# Supplementary material
Source: HighWire-hosted journal article supplement (https://dmd.aspetjournals.org/highwire/filestream/65890/field_highwire_adjunct_files/1/DMD20479_Trend_analysis.xls)
Supplement: DMD20479_Trend_analysis.xls [file DMD20479_Trend_analysis.xls]

## Sheet: Obach_Lombardo_Waters_SI
SUPPORTING INFORMATION TREND ANALYSIS OF A DATABASE OF INTRAVENOUS PHARMACOKINETIC PARAMETERS IN HUMANS FOR 670 DRUG COMPOUNDS R. Scott Obach, Franco Lombardo, Nigel J. Waters Complete set of compound names, CAS numbers, pharmacokinetic data, full references and comment from authors.
#	Name	CAS #	VDss (L/kg)	CL (mL/min/kg)	fu	MRT (h)	t1/2 (h)	Reference	Comments
1	Abacavir	136470-78-5	0.84	13	0.5	1.1	1	Chittick GE, Gillotin C, McDowell JA, Lou Y, Edwards KD, Prince WT, and Stein DS. (1999) Abacavir: absolute bioavailability, bioequivalence of three oral formulations, and effect of food. Pharmacotherapy 19: 932-942. Ziagen Product Label.
2	Abanoquil	90402-40-7	6.3	14	NF	7.6	5.9	Schafers RF, Elliott HL, Meredith PA, Miller SHK, and Reid JL (1991) Studies with abanoquil (UK-52,046) a novel quinoline α1-adrenoceptor antagonist: II. Duration of action, pharmacokinetics and concentration-effect relationships in normotensive subjects. Br. J. Clin. Pharmacol. 32: 605-610.
3	Acarbose	56180-94-0	0.32	2.2	NF	2.4	2.7	Putter J, Keup U, Krause HP, Muller L, and Weber H (1982) Pharmacokinetics of acarbose. Int. Congr. Ser. 594: 38-48.
4	Acebutolol	37517-30-9	1.7	10	0.74	2.8	3.5	Kaye CM, Kumana CR, Leighton M, Hamer J, and Turner P (1976) Observations on the pharmacokinetics of acebutolol. Clin. Pharmacol. Ther. 19: 416-420. Meffin PJ, Winkle RA, Peters FA, and Harrison DC (1977) Acebutolol disposition after intravenous administration. Clin. Pharmacol. Ther. 22: 557-567. Roux A, Flouvat B, Chau NP, Letac B, and Lucsko M (1980) Pharmacokinetics of acebutalol after intrave…	Vss calculated from digitized plots from Kaye, et al, and from reported microconstants from Roux, et al.
5	Acecainide (N-acetylprocainamide)	32795-44-1	1.9	4	0.9	7.9	6.4	Coyle JD, Boudoulas H, and Lima JJ (1991) Acecainide pharmacokinetics in normal subjects of known acetylator phenotype. Biopharm. Drug Dispos. 12: 599-612. Connolly SJ and Kates RE (1982) Clinical pharmacokinetics of N-acetylprocainamide. Clin. Pharmacokinet. 7: 206-220.
6	Acetaminophen	103-90-2	1	5	0.52	3.3	2.5	Rowlins MD, Henderson DB, Hijab AR (1977) Pharmacokinetics of paracetamol (acetaminophen) after intravenous and oral administration. Eur. J. Clin. Pharmacol. 11: 283-286. Kurz H, Mauser-Ganshorn A, and Stickel HH (1977) Differences in the binding of drugs to plasma proteins from newborn and adult man. I. Eur. J. Clin. Pharmacol. 11: 463-467.	VDss calculated from micro rate constants provided in Rowlins et al.
7	Acetazolamide	59-66-5	0.37	0.65	0.04	9.5	13	Chapron DJ, Sweeney KR, Feig PU, and Kramer PA (1985) Influence of advanced age on the disposition of acetazolamide. Br. J. Clin. Pharmacol. 19: 363-371.	VDss and t1/2 were calculated from C vs t data obtained by digitization of plots included in the reference.
8	Acetylcysteine, N-	616-91-1	0.55	3.1	0.17	3	5.5	Prescott LF, Donovan JW, Jarvie DR, and Proudfoot AT (1989) The disposition and kinetics of intravenous N-acetylcysteine in patients with paracetamol overdosage. Eur. J. Clin. Pharmacol. 37: 501-506. Acetadote Product Label.
9	Acetylmethadol, L-	1477-40-3	8.3	5.4	0.2	26	18	Walsh SL, Johnson RE, Cone EJ, and Bigelow GE (1998) Intravenous and oral l-.alpha.-acetylmethadol: pharmacodynamics and pharmacokinetics in humans. J. Pharmacol. Exp. Ther. 285: 71-82. Toro-Goyco E, Martin BR, and Harris LS (1980) Binding of 1-alpha-acetylmethadol and its metabolites to blood constituents. Biochem. Pharmacol. 29: 1897-1902.
10	Acetylsalicylic Acid	50-78-2	0.22	12	0.68	0.3	0.26	Aarons L, Hopkins K, Rowland M, Brossel S, and Thiercelin JF (1989) Route of administration and sex differences in the pharmacokinetics of aspirin, administered as its lysine salt. Pharm. Res. 6: 660-666. Lee S, Johnson D, Klein J, and Eppler J (1995) Protein binding of acetylsalicylic acid and salicylic acid in porcine and human serum. Vet. Human Toxicol. 37: 224-225
11	Acivicin	42228-92-2	0.5	0.69	NF	12	9.9	McGovern JP, Pratt EA, Belt RJ, Taylor SA, Benjamin RS, Ardalan B, and Ohnuma T (1985) Pharmacokinetic and biochemical studies on acivicin in phase I clinical trials. Canc. Res. 45: 4460-4463.	VDss was calculated from C vs t data obtained by digitization of a plot for one subjected that was included in the reference. Plasma concentrations were determined by bioassay.
12	Acyclovir	59277-89-3	0.71	4.7	0.85	2.5	2.5	De Miranda P and Blum MR (1983) Pharmacokinetics of acyclovir after intravenous and oral administration. J. Antimic. Chemother. 12(Suppl B): 29-37.
13	Adefovir	106941-25-7	0.42	3.7	0.96	1.9	1.6	Cundy KC, Barditch-Crovo P, Walker RE, Collier AC, Ebeling D, Toole J, and Jaffe HS. (1995) Clinical pharmacokinetics of adefovir in human immunodeficiency virus type 1-infected patients. Antimic. Ag. Chemother. 39: 2401-2405. Hepsera Product Label.
14	Adinazolam	37115-32-5	0.98	6.2	0.31	2.6	2.1	Fleishaker JC, Friedman H, and Pollock SR (1991) Extent and variability of the first-pass elimination of adinazolam mesylate in healthy male volunteers. Pharm. Res. 8: 162-167.
15	Albuterol (salbutamol)	18559-94-9	1.9	7.8	0.92	4.1	2.4	Boulton DW and Fawcett JP (1996) Enantioselective disposition of salbutamol in man following oral and intravenous administration. Br. J. Clin. Pharmacol. 1996, 41, 35-40. Morgan DJ, Paull JD, Richmond BH, Wilson-Evered E, and Ziccone SP (1986) Pharmacokinetics of intravenous and oral salbutamol and its sulphate conjugate. Br. J. Clin. Pharmacol. 22: 587-593.	Data for enantiomers were averaged.
16	Alcuronium	23214-96-2	0.32	1.3	NF	4.1	3.6	Walker J, Shanks CA, and Triggs EJ (1980) Clinical pharmacokinetics of alcuronium chloride in man. Eur. J. Clin. Pharmacol. 17: 449-457.
17	Alfentanil	71195-58-9	0.45	3.9	0.086	1.9	1.6	Bower S and Hull CJ (1982) Comparative pharmacokinetics of fentanyl and alfentanil. Br. J. Anaesth. 54: 871-877. McDonnell CG, Malkan D, Van Pelt FD, and Shorten GD (2003) Elimination of alfentanil delivered by infusion is not altered by the chronic administration of atorvastatin. Eur. J. Anaesth. 20: 662-667. Meuldermans WEG, Hurkmans RMA, and Heykants JJP (1982) Plasma protein binding and distr…
18	Alfuzosin	81403-80-7	1.5	5.9	NF	4.2	4.8	Guinebault P, Colafranceschi C, Bianchetti G, Thenot JP, Maillard D, Thiercelin JF, Larribaud J, and Morselli PL (1984) Absolute bioavailability of alfluzocine, a new alpha1 postsynaptic receptor antagonist, after oral and intravenous administration. Biopharm. Pharmacokinet. 2nd European Congress 2: 578-583.	VDss calculated from C vs t data obtained by digitization of the plots included in the reference.
19	Alizapride	59338-93-1	1.6	6.6	NF	4	2.8	Houin G, Barre J, and Tillement JP (1984) Absolute intramuscular, oral, and rectal bioavailability of alizapride. J. Pharm. Sci. 73: 1450-1453.	VDss calculated from C vs t data obtained by digitization of the plots included in the reference.
20	Allopurinol	315-30-0	0.58	11	0.97	0.88	0.8	Breithaupt H and Tittel M (1982) Kinetics of allopurinol after sinlge intravenous and oral doses. Eur. J. Clin. Pharmacol. 22: 77-84. Elion GB, Kovensky A, Hitchings GH, Metz E, and Rundles RW (1966) Metabolic studies of allopurinol, an inhibitor of xanthine oxidase. Biochem. Pharmacol. 15: 863-889.
21	Almotriptan	154323-57-6	2.2	8.9	0.6	4.2	3.4	Gras J, Llenas J, Jansat JM, Jáuregui J, Cabarrocas X, Palacios JM (2002) Almotriptan, a New Anti-Migraine Agent: A Review CNS Drug Rev. 8: 217-234. Jansat, JM, Costa J, Salva P, Fernandez FJ, and Martinez-Tobed A (2002) Absolute bioavailability, pharmacokinetics, and urinary excretion of the novel antimigraine agent almotriptan in healthy male volunteers. J. Clin. Pharmacol. 42: 1303-1310.	VDss calculated from MRT and CL reported in Jansat, et al.
22	Alosetron	122852-42-0	1.1	8.7	0.18	2.1	1.6	Kock KM, Palmer JL, Noordin N, Tomlinson JJ, and Baidoo C (2002) Sex and age differences in the pharmacokinetics of alosetron. Br. J. Clin. Pharmacol. 53: 238-242. Lotronex Product Label
23	Alprazolam	28981-97-7	0.8	0.74	0.29	18	12	Smith RB, Kroboth PD, Vanderligt JT, Phillips JP, and Juhl RP (1984) Pharmacokinetics and pharmacodynamics of alprazolam after oral and IV administration. Psychopharmacology 84: 452-456. Greenblatt DJ and Wright CE (1993) Clinical pharmacokinetics of alprazolam. Therapeutic implications. Clin. pharmacokinet. 24: 453-471.	VDss obtained from C vs t data obtained by digitization of the plot provided in the reference.
24	Alprenolol	13655-52-2	3.2	15	0.18	3.6	2.5	Bodin NO, Borg KO, Johansson R, Obianwu H, Svensson R (1974) The absorption, distribution, and excretion of alprenolol in man, dog, and rat. Acta Pharmacol. Toxicol. 35: 261-269. Imamura H, Komori T, Ismail A, Suenaga A, and Otagiri M (2002) Stereoselective protein binding of alprenolol in the renal diseased state. Chirality 14: 599-603.	VDss and CL calculated from C vs t data obtained by digitization of the plot provided in the reference.
25	Amantadine	768-94-5	6.6	4.8	0.33	23	16	Aoki FY and Sitar DS (1988) Clinical pharmacokinetics of amantadine hydrochloride. Clin. Pharmacokinet. 14: 35-51.
26	Amdinocillin	32887-01-7	0.37	6.3	NF	1	1.1	Patel IH, Bornemann LD, Brocks VM, Fang LS, Tolkoff-Rubin NE, and Rubin RH (1985) Pharmacokinetics of intravenous amdinocillin in healthy subjects and patients with renal insufficiency. Antimic. Ag. Chemother. 28: 46-50.	VDss obtained from C vs t data obtained by digitization of the plot provided in the reference.
27	Amikacin	37517-28-5	0.16	1.1	0.88	2.4	2.4	Lanao JM, Dominguez-Gil A, Tabernero JM, and De Castro S (1979) Pharmacokinetics of amikacin (BB-K8) in patients with normal or impaired renal function. Int. J. Clin. Pharmacol. Biopharm. 17: 171-175. Clarke JT, Libke RD, Regamey C, and Kirby WMM (1974) Comparative pharmacokinetics of amikacin and kanamycin. Clin. Pharmacol. Ther. 15: 610-616. Brunnemann SR and Segal JR (1991) Amikacin serum prot…	CL calculated from reported compartmental model parameters. Protein binding data averaged from two papers.
28	Aminocamptothecin, 9-	91421-43-1	2.2	6.5	0.003	5.6	7	Herben VM, van Gijn R, Schellens JH, Schot M, Lieverst J, Hillebrand MJ, Schoemaker NE, Porro MG, Beijnen JH, and ten Bokkel Huinink WW (1999) Phase I and pharmacokinetic study of a daily times 5 short intravenous infusion schedule of 9-aminocamptothecin in a colloidal dispersion formulation in patients with advanced solid tumors. J. Clin. Oncol.17: 1906-1914. Masubuchi N, May RD, and Atsumi R (2…
29	Aminohexanoic acid, 6-	60-32-2	0.39	2.5	0.92	2.6	4.9	Frederiksen MC, Bowsher DJ, Ruo TI, Henthorn TK, Ts'ao CH, Green D, and Atkinson AJ (1984) Kinetics of epsilon-aminocaproic acid distribution, elimination, and antifibrinolytic effects in normal subjects. Clin. Pharmacol. Ther. 35: 387-393. McNicol GP, Fletcher AP, Alkjaersig N, and Sherry S (1962) The absorption, distribution, and excretion of e-aminocaproic acid following oral or intravenous ad…
30	Aminosalicylic acid, 5-	89-57-6	0.33	9.3	0.39	0.59	0.61	Bondesen S, Hegnhoj J, Larsen F, Hansen H, Hansen CP, and Rasmussen SN (1991) Pharmacokinetics of 5-aminosalicylic acid in man following administration of intravenous bolus and per os slow-release formulation. Digest. Dis. Sci. 12: 1735-1740. Way EL, Smith PK, Howie DL, Weiss R, and Swanson R (1948) The absorption, distribution, excretion, and fate of para-aminosalicylic acid. J. Pharmacol. Exp. …	VDss and t1/2 calculated from data obtained by digitization of C vs t plots provided in the references.
31	Amiodarone	1951-25-3	60	1.9	0.0002	620	820	Ujhelyi MR, Klamerus KJ, Vadiei K, O'Rangers E, Izard M, Neefe DL, Zimmerman JJ, and Chow MSS (1996) Disposition of intravenous amiodarone in subjects with normal and impaired renal function. J. Clin. Pharmacol. 36: 122-130. Veronese ME, McLean S, and Hendriks R (1988) Plasma protein binding of amiodarone in a patient population: measurement by erythrocyte partitioning and a novel glass-binding m…
32	Amitriptyline	50-48-6	8.7	6.1	0.07	24	17	Jorgensen A and Hansen V (1976) Pharmacokinetics of amitriptyline infused intravenously in man. Eur. J. Clin. Pharmacol. 10: 337-341. Nyberg G and Maartensson E (1984) Determination of free fractions of tricyclic antidepressants. Naunyn-Sch Arch. Pharmacol. 327: 260-265.
33	Amlodipine	88150-42-9	17	7	0.005	40	34	Faulkner JK, McGibney D, Chasseaud LF, Perry JL, and Taylor IW (1986) The pharmacokinetics of amlodipine in healthy volunteers after single intravenous and oral doses and after 14 repeated oral doses given once daily. Br. J. Clin. Pharmacol. 22: 21-25. Kirsten R, Nelson K, Kirsten D, and Heintz B (1998) Clinical pharmacokinetics of vasodilators. Part I. Clin. Pharmacokinet. 34: 457-482.	VDss calculated from C vs t data obtained by digitization of the plot in Faulkner et al.
34	Amoxicillin	26787-78-0	0.25	3.3	0.85	1.3	1.1	Arancibia A, Guttmann J, Gonzalez G, and Gonzalez C (1980) Absorption and disposition kinetics of amoxicillin in normal human subjects. Antimic. Ag. Chemother. 17: 199-202. Bergan T (1984) Pharmacokinetics of beta-lactam antibiotics. Scand. J. Infect. Dis. 42(Suppl): 83-98.
35	Amphetamine	300-62-9	6.1	9.7	0.8	10	7.3	Angagard E, Gunne LM, Jonsson LE and Niklasson F (1970) Pharmacokinetics and clinical studies on amphetamine dependent subjects. Eur. J. Clin. Pharmacol. 3: 3-11. Busto U, Bendayan R, and Sellers EM (1989) Clinical pharmacokinetics of non-opiate abused drugs. Clin. Pharmacokinet. 16: 1-26. De la Torre R, Farre M, Navarro M, Pacifici R, Zuccaro P, and Pichini S (2004) Clinical pharmacokinetics of …	PK reported as monoexponential decline so reported VD was used as VDss. CL calculated from VD and t1/2.
36	Ampicillin	69-53-4	0.22	2.8	0.85	1.3	1.4	Blum RA, Kohli RK, Harrison NJ, and Schentag JJ (1989) Pharmacokinetics of ampicillin (2.0 grams) and sulbactam (1.0 gram) coadministered to subjects with normal and abnormal renal function and with end-stage renal disease on hemodialysis. Antimic. Ag. Chemother. 33: 1470-1476. Bergan T (1984) Pharmacokinetics of beta-lactam antibiotics. Scand. J. Infect. Dis. 42(Suppl): 83-98.
37	Amrinone	60719-84-8	1.3	8.9	0.89	2.4	2	Hamilton RA, Kowalsky SF, Wright EM, Cernak P, Benziger DP, Stroshane RM, and Edelson J (1986) Effect of the acetylator phenotype on amrinone pharmacokinetics. Clin. Pharmacol. Ther. 40: 615-619. Koprda V, Trnovec T, and Landmann H (1986) The binding of amrinone to plasma proteins. Pharmazie 41: 300-301.	CL value from rapid acetylators only.
38	Amsacrine	51264-14-3	1.6	4.3	0.029	6.2	4.7	Jurlina JL, Varcoe AR, and Paxton JW (1985) Pharmacokinetics of amsacrine in patients receiving combined chemotherapy for treatment of acute myelogenous leukemia. Canc. Chemother. Pharmacol. 14: 21-25. Paxton JW, Kim SN, and Whitfield LR (1990) Pharmacokinetic and toxicity scaling of the antitumor agents amsacrine and CI-921, a new analogue, in mice, rats, rabbits, dogs, and humans. Cancer Res. 5…	VDss reported in Paxton, et al, and cites Jurlina, et al., references which has only Vdbeta at 1.7 L/kg. Used value from Paxton report.
39	Amsalog	80841-47-0	0.3	2.6	0.0011	1.9	2.4	Paxton JW, Hardy JR, Evans PC, Harvey VJ, and Baguley BC (1988) The clinical pharmacokinetics of N-5-dimethyl-9-[(2-methoxy-4-methyl-sulfonylamino)phenylamino]-4-acridinecarboxamide (CI-921) in a phase 1 trial. Canc. Chemother. Pharmacol. 22: 235-240. Fyfe D, Prce C, Langley RE, Pagonis C, Houghton J, Osborne L, Woll PJ, Gardner C, Baguley BC, and Carmichael J (2001) A phase I trial of amsalog (C…
40	Anhydrovinblastine	38390-45-3	12	12	NF	17	18	Ramnath N, Schwartz GN, Smith P, Bong D, Kanter P, Berdzik J, and Creaven PJ (2003) Phase I and pharmacokinetic study of anhydrovinblastine every three weeks in patients with refractory solid tumors. Canc. Chemother. Pharmacol. 51: 227-230.	VDss was calculated from C vs t data obtained by digitization of the plots provided in the reference. Median values for CL and t1/2 were reported.
41	Anidulafungin	166663-25-8	0.57	0.21	0.16	45	40	Dowell JA, Schranz J, Baruch A, and Foster G (2005) Safety and pharmacokinetics of coadministered voriconazole and anidulafungin. J. Clin. Pharmacol. 45: 1373-1382. Eraxis Product Label.
42	Antipyrine	60-80-0	0.77	0.64	0.93	20	12	Andreasen PB and Vesell ES (1974) Comparison of plasma levels of antipyrine, tolbutamide, and warfarin after oral and intravenous administration. Clin. Pharmacol. Ther. 16: 1059-1065. Danhof M, vanZuilen A, Boeijinga JK, and Breimer DD (1982) Studies of the different metabolic pathways of antipyrine in man. Eur. J. Clin. Pharmacol. 21: 433-441. Lee KJ, Mower R, Hollenbeck T, Castelo J, Johnson N,…	Danhof reference not included for VDss (would require digitization); Andreason reference used a one-compartment model so VDc = VDss.
43	Aprepitant	170729-80-3	0.94	1	0.05	16	13	Majumdar AK, Howard L, Goldberg, MR, Hickey L, Constanzer M, Rothenberg PL, Crumley TM, Panebianco D, Bradstreet TE, Bergman AJ, Waldman SA, Greenberg HE, Butler K, Knops A, De Lepeleire I, Michiels N, and Petty KJ (2006) Pharmacokinetics of aprepitant after single and multiple oral doses in healthy volunteers. J. Clin. Pharmacol. 46: 291-300. Emend Product Label.
44	Argatroban	74863-84-6	0.17	5	NF	0.57	0.4	Hauptmann, J. (2002) Pharmacokinetics of an emerging new class of anticoagulant/antithrombotic drugs A review of small-molecule thrombin inhibitors. Eur J Clin Pharmacol 57: 751-758.
45	Aripiprazole	129722-12-9	4.9	0.83	0.01	98	75	Abilify Product Label.	CL value in FDA documents on-line.
46	Artesunate	88495-63-0	15	1070	0.25	0.32	0.22	Newton PN, Barnes KI, Smith PJ, Evans AC, Chierakul, W, Ruangveerayuth R, and WhiteNJ (2006) The pharmacokinetics of intravenous artesunate in adults with severe falciparum malaria. Eur. J. Clin. Pharmacol. 62: 1003-1009. Li Q, Xie LH, Haeberle A, Zhang J, and Weina P (2006) The evaluation of radiolabeled artesunate on tissue distribution in rats and protein binding in humans. Am. J. Trop. Med. H…
47	Atenolol	29122-68-7	0.95	2.5	0.94	6.3	6.1	Mason WD, Winer N, Kochak G, Cohen I, and Bell R (1979) Kinetics and absolute bioavailability of atenolol. Clin. Pharmacol. Ther. 25: 408-415. Henry JA and Mitchell SN (1981) Effect of pH on human plasma protein binding of a series of .beta.-adrenoceptor antagonists. Br. J. Clin. Pharmacol. 11: 119P-120P.	VDss calculated from reported micro constants.
48	Atomoxetine	83015-26-3	0.85	9.3	0.02	1.5	5.2	Strattera Product Label	CYP2D6 EM data MRT is calculated as VD/CL; CL was calculated as CLpo/F (F=63%)
49	Atovaquone	95233-18-4	0.6	0.15	0.001	67	63	Mepron Product Label
50	Atracurium	64228-79-1	0.1	5.7	0.52	0.29	0.31	Cameron M, Donati F, and Varin F (1995) In vitro plasma protein binding of neuromuscular blocking agents in different subpopulations of patients. Anesth. Analg. 81: 1019-1025. deBros FM, Lai A, Scott R, deBros J, Batson AG, Goudsouzian N, Ali HH, Cosimi AB, and Savarese JJ (1986) Pharmacokinetics and pharmacodynamics of atracurium during isoflurane anesthesia in normal and anephric patients. Anes…	VDss calculated from estimated C vs t data from Cameron, et al, and from reprted microconstants from Ward, et al.
51	Atropine	51-55-8	3.3	7.6	0.61	7.2	4.1	Adams RG, Verma P, Jackson AJ, and Miller RL (1982) Plasma pharmacokinetics of intravenously administered atropine in normal human subjects. J. Clin. Pharmacol. 22: 477-481. Kurz H, Mauser-Ganshorn A, and Stickel HH (1977) Differences in the binding of drugs to plasma proteins from newborn and adult man. I. Eur. J. Clin. Pharmacol. 11: 463-467.
52	Azacitidine	320-67-2	0.47	35	NF	0.22	0.36	Marcucci G, Silverman L, Eller M, Lintz L, and Beach CL (2005) Bioavailability of azacitidine subcutaneous versus intravenous in patients with the myelodysplastic syndromes. J. Clin. Pharmacol. 45: 597-602.	VDss was calculated using C vs t data obtained by digitization of the plot provided in the reference.
53	Azapropazone	13539-59-8	0.12	0.14	0.004	14	17	Gikalov I, Kaufmann R, and Schuster O (1982) Humanpharmakokinetik verschiedener i.v. dosen von azapropazon (HPLC-bestimmung). Arzn. Forsch. 32: 423-426.	VDss was calculated from C vs t data provided in the reference.
54	Azelastine	58581-89-8	15	9	0.17	27	22	Weliky I, Howard JR, and Wichmann JK (1990) Absolute bioavailability and pharmacokinetics of azelastine. Pharm. Res. 7: S-247. Estelle F, Simons R, and Simons KJ (1999) Clinical pharmacology of new histamine H1 receptor antagonists. Clin. Pharmacokinet. 36: 329-352.
55	Azimilide	149908-53-2	13	2.4	0.06	100	79	Corey AE, Agnew JR, Valentine SN, Nesbitt JD, Wagner DL, Powell JH, and Thompson GA (1999) Azimilide pharmacokinetics following intravenous and oral administration of a solution and capsule formulation. J. Clin. Pharmacol. 39: 1272-1276.
56	Azithromycin	83905-01-5	33	10	0.88	57	69	Luke DR, Foulds G, Cohen SF, and Levy B (1996) Safety, toleration, and pharmacokinetics of intravenous azithromycin. Antimic. Ag. Chemother. 40: 2577-2581. Foulds G, Shepard RM, and Johnson RB (1990) The pharmacokinetics of azithromycin in human serum and tissues. J. Antimic. Chemother. 25(Suppl. A): 73-82.	Protein binding is concentration dependent; cited value measured at concentrations observed after IV dosing.
57	Azlocillin	37091-66-0	0.26	2.5	0.65	1.7	1.2	Haen E, Remien J, Richter E, Frank U, and Adam D (1985) Uber die bedeutung der applikationsgeschwindigkeit fur die pharmakokinetischen parameter von azlocillin und mexlocillin. Arz. Forsch. 35: 864-868. Bergan T (1984) Pharmacokinetics of beta-lactam antibiotics. Scand. J. Infect. Dis. 42(Suppl): 83-98.	Pharmacokinetic parameters were calculated from C vs t data provided in the reference.
58	Aztreonam	78110-38-0	0.18	1.5	0.4	2.1	1.5	Burgess DS, Summers KK, and HardinTC (1999) Pharmacokinetics and pharmacodynamics of aztreonam administered by continuous intravenous infusion. Clin. Ther. 21: 1882-1889. Swabb EA, Sugerman A, Frantz M, Platt TB, and Stern M (1983) Renal handling of the monobactam azthreonam in healthy subjects. Clin. Pharmacol. Ther. 33: 609-614.
59	Bambuterol	81732-65-2	1.6	18	NF	1.4	2.6	Nyberg L, Rosenborg J, Weibull E, Jonsson S, Kennedy BM, and Nilsson M (1998) Pharmacokinetics of bambuterol in healthy subjects. Br. J. Clin. Pharmacol. 45: 471-478.
60	BB 83698	325795-25-3	1.1	3.1	NF	5.9	9.4	Ramanathan-Girish S, McColm J, Clements JM, Taupin P, Barrowcliffe S, Hevizi J, Safrin S, Moore C, Patou G, Moser H, Gadd A, Hoch U, Jiang V, Lofland D, and Johnson KW (2004) Pharmacokinetics in animals and humans of a first-in-class peptide deformylase inhibitor. Antimic. Ag. Chemother. 48: 4835-4842.
61	Beclomethasone dipropionate	5534-09-8	0.29	36	0.13	0.1	0.5	Daley-Yates PT, Price AC, Sisson JR, Pereira A, and Dallow N (2001) Beclomethasone dipropionate: absolute bioavailability, pharmacokinetics and metabolism following intravenous, oral, intranasal and inhaled administration in man. Br. J.. Clin. Pharmacol. 51: 400-409. Beconase AQ Product Label
62	Benperidol	2062-84-2	3.8	8.3	NF	7.5	5.8	Seiler W, Wetzel H, Hillert A, Schoellnhammer G, Langer M, Barlage U, and Hiemke C (1994) Pharmacokinetics and bioavailability of benperidol in schizophrenic patients after intravenous and two different kinds of oral application. Psychopharmacology 116: 457-463.
63	Betamethasone	378-44-9	1.3	2.8	0.36	7.9	5.6	Petersen MC, Nation RL, McBride WG, Ashley JJ, and Moore RG (1983) Pharmacokinetics of betamethasone in healthy adults after intravenous administration. Eur. J. Clin. Pharmacol. 25: 643-650.	VDss was calculated using C vs t data obtained by digitization of the plot provided in the reference.
64	Betamipron	3440-28-6	0.28	9.2	0.17	0.51	0.59	Saito A (1991) Pharmacokinetics of panipenem/betamipron. Chemotherapy (Tokyo) 39(Suppl. 3): 227-235. Kurihara A, Naganuma H, Hisaoka M, Tokiwa H, and Kawahara Y (1992) Prediction of human pharmacokinetics of panipenem-betamipron, a new carbapenem, from animal data. Antimic. Ag. Chemother. 36: 1810-1816.	VDss calculated from C vs t data provided in the reference.
65	Betaxolol	63659-18-7	4.8	3.4	0.4	24	17	Ludden TM, Boyle DA, Gieseker D, Kennedy GT, Crawford MH, Ludden LK, and Clementi WA (1988) Absolute bioavailability and dose proportionality of betaxolol in normal healthy subjects. J. Pharm. Sci. 77: 779-783. Henry JA and Mitchell SN (1981) Effect of pH on human plasma protein binding of a series of .beta.-adrenoceptor antagonists. Br. J. Clin. Pharmacol. 11: 119P-120P.
66	Bevantolol	59170-23-9	0.67	5.5	0.015	2	1.9	McNeil JJ, Drummer OH, Anderson AIE, and Louis WJ (1986) Pharmacokinetics and concentration-effect relationships of bevantolol (CI-775) in normal volunteers. J. Cardiovasc. Pharmacol. 8: 1201-1207. Ichikawa M, Haruki S, Esumi Y, Takaichi M, Seki H, and Shiina M (1992) Metabolic fate of bevantolol hydrochloride. Absorption, distribution and excretion in rats and dogs after single oral administrati…	VDss calculated from reported microconstants.
67	Biapenem	120410-24-4	0.2	2.5	0.92	1.3	1.1	Shiba K, Maezawa H, Yoshida M, Sakai O, and Saito A (1994) Basic and clinical studies of biapenem. Chemotherapy 42(Suppl. 4): 322-329. Yamashita N, Kawashima K, Nomura K, Takeuchi H, Hikida M, and Naruke T (1994) Pharmacokinetics of biapenem in laboratory animals. Chemotherapy 42(Suppl. 4): 243-250.
68	Bilobalide	33570-04-6	2.5	10	NF	4	3.2	Fourtillian JB, Brisson AM, Girault J, Ingrand I, Decourt JP, Drieu K, Jouenne P, and Biber A (1995) Proprietes pharmaccinetiques du bilobalide et des ginkgolides A et B chez le sujet sain apres administrations intraveineuses et orales d'extrait de Ginkgo biolba (EGb 761). Therapie 50: 137-144.
69	Biperiden	514-65-8	12	12	0.097	17	24	Grimaldi R, Perucca E, Ruberto G, Gelmi C, Trimarchi F, Hollmann M, and Crema A (1986) Pharmacokinetic and pharmacodynamic studies following the intravenous and oral administration of the antiparkinsonian drug biperiden to normal subjects. Eur. J. Clin. Pharmacol. 29: 735-737. Nakashima E, Yokogawa K, Ichimura F, Kurata K, Kido H, Yamaguchi N, and Yamana T (1987) A physiologically based pharmacok…
70	Bisaramil	89194-77-4	9	17	NF	8.8	8.6	Gemesi L, Kapas M, Matos L (1993) Pharmacokinetic study of bisaramil in man. Acta Pharm. Hungarica 63: 327-333.	VDss calculated from reported C vs t data table.
71	Bisoprolol	66722-44-9	2.4	3.7	0.66	11	10	Horikiri Y, Suzuki T, and Mizobe M (1998) Pharmacokinetics and Metabolism of Bisoprolol Enantiomers in Humans. J. Pharm. Sci. 87: 289-294. Leopold G, Pabst J, Ungethuem W, and Buehring KU (1986) Basic pharmacokinetics of bisoprolol, a new highly beta1-selective adrenoceptor antagonist. J. Clin. Pharmacol. 26: 616-621.	VDss calculated from C vs t data obtained by digitization of the plot provided by Leopold et al.
72	BMS-214662	195987-41-8	0.84	9.6	NF	1.4	1.6	Ryan DP, Eder JP, Puchlaski T, Seiden MV, Lynch TJ, Fuchs CS, Amrein PC, Sonnichsen D, Supko JG, and Clark JW (2004) Phase I clinical trial of the farnesyltransferase inhibitor BMS-214662 given as a 1 hour intravenous infusion in patients with advanced solid tumors. Clin. Canc. Res. 10: 2222-2230.
73	Bortezomib	179324-69-7	10	19	0.17	8.8	18	Papandreou CN, Daliani D, Nix D, Yang H, Madden T, Wang X, Pien CS, Millikan RE, Tu SM, Pagliaro L, Kim J, Adams J, Elliott P, Esseltine D, Petrusich A, Dieringer P, Perez C, and Logothetis CJ (2004) Phase I trial of the proteasome inhibitor bortezomib in patients with advanced solid tumors with observations in androgen-independent prostate cancer. J. Clin. Oncol. 22: 2108-2121. Velcade Product L…
74	Bosentan	147536-97-8	0.29	2.1	0.037	2.3	4.1	Weber C, Schmitt R, Birnboeck H, Hopfgartner G, Eggers H, Meyer J, Van Marle S, Viischer HW, and Jonkman JHG (1999) Multiple-dose pharmacokinetics, safety, and tolerability of bosentan, an endothelin receptor antagonist, in healthy male volunteers. J. Clin. Pharmacol. 39: 703-714. Weber C, Schmitt R, Birnboeck H, Hopfgartner G, Van Marle SP, Peeters PAM, Jonkman JHG, and Jones CR (1996) Pharmacok…
75	Bromazepam	1812-30-2	0.85	0.51	0.48	28	21	Raaflaub VJ and Speiser-Courvoisier J (1974) Zur pharmakokinetik von bromazepam beim menschen. Arz. Forsch. 24: 1841-1844. Lucek RW and Coutinho CB (1976) The role of substituents in the hydrophobic binding of the 1,4-benzodiazepines by human plasma proteins. Molec. Pharmacol. 12: 612-619.	Parameters calculated from C vs t data provided in the reference.
76	Bromfenac	91714-94-2	0.11	1.3	0.0011	1.5	2.6	Gumbhir-Shah K, Cevallos WH, DeCleene SA, Halstenson CE, and Korth-Bradley JM (1997) Absolute bioavailability of bromfenac in humans. Ann. Pharmacother. 31: 395-399.
77	Bromopride	4093-35-0	3.1	13	0.6	4	2.9	Brodie RR, Chasseaud LF, Darragh A, Lambe RF, Rooney L, and Taylor T (1986) Pharmacokinetics and bioavailability of the anti-emetic agent bromopride. Biopharm. Drug Dispos. 7: 215-222.	VDss was calculated using C vs t data provided in the reference.
78	Brotizolam	57801-81-7	0.75	2	0.092	6	4.8	Jochemsen R, Wesselman JGJ, Hermans J, Van Boxtel CJ, and Breimer DD (1983) Pharmacokinetics of brotizolam in healthy subjects following intravenous and oral administration. Br. J. Clin. Pharmacol. 16(Suppl. 2): 285-290. Jochemsen R, Joeres RP, Wesselman JG, Richter E, and Breimer DD (1983) Pharmacokinetics of oral brotizolam in patients with liver cirrhosis. Br. J. Clin. Pharmacol. 16(Suppl 2): …	VDss was calculated using data obtained by digitization of the C vs t plot provided in the reference.
79	Budesonide	51333-22-3	3.9	20	0.13	3.2	2.8	Ryrfeldt A, Andersson P, Edsbacker S, Tonnesson M, Davies D, and Pauwels R (1982) Pharmacokinetics and metabolism of budesonide, a selective glucocorticoid. Eur. J. Resp. Dis. 63: 86-95. Entocort EC Product Label.	VDss was calculated using data obtained by digitization of the C vs t plot provided in the reference.
80	Buflomedil	55837-25-7	1.3	5.6	0.4	3.9	3.3	Gundert-Remy U, Weber E, Lam G, Chiou WL, Mann W, and Aynilian GH (1981) The clinical pharmacokinetics of buflomedil in normal subjects after intravenous and oral administration. Eur. J.Clin. Pharmacol. 20: 459-63. Rey E, D'Athis P, Richard MO, Fillastre JP, and Olive G (1984) Pharmacokinetics of buflomedil after intravenous administration in patients with chronic renal failure. Int. J. Clin. Pha…
81	Bufuralol	54340-62-4	1.7	8.9	0.19	3.18352	2.3	Dayer P, Balant L, Kupfer A, Striberni R, and Leemann T (1985) Effect of oxidative polymorphism (debrisoquine/sparteine type) on hepatic first-pass metabolism of bufuralol. Eur. J. Clin. Pharmacol. 28: 317-320. Foti RS and Fisher MB (2004) Impact of incubation conditions on bufuralol human clearance predictions: Enzyme lability and nonspecific binding. Drug Metab. Dispos. 32: 295-304.	CYP2D6 extensive metabolizers only. VDss calculated from C vs t data obtained by digitization of the plots included in the reference.
82	Bumetanide	28395-03-1	0.16	2.5	0.031	1.1	1.2	Pentikainen PJ, Pasternack A, Lampainen E, Neuvonen PJ, and Penttila A (1985) Bumetanide kinetics in renal failure. Clin. Pharmacol. Ther. 37: 582-528. Lau HSH, Hyneck ML, Berardi RR, Swartz RD, and Smith DE (1986) Kinetics, dynamics, and bioavailability of bumetanide in healthy subjects and patients with chronic renal failure. Clin. Pharmacol. Ther. 39: 635-645. Cook JA, Smith DE, Cornish LA, Ta…	Data combined from three references.
83	Bunazosin	80755-51-7	0.72	4.8	0.06	2.5	2	Morishita N, Tomono Y, Hasegawa J, and Heuer HJ (1993) Single dose crossover study to evaluate the absolute bioavailability of a sustained-release formulation of bunazosin (E1015) in healthy male volunteers. Drug Invest. 6: 5-9. Yamato C, Takahashi T, Tadano K, Kinoshita K, and Fujita T (1985) The metabolic fate of bunazosin hydrochloride (2). Studies on the transfer to fetus and milk, plasma pro…
84	Bupivacaine	38396-39-3	0.84	4.3	0.056	3.3	3.1	Burm AGL, Van der Meer AD, Van Kleef JW, Zeijlmans PWM, and Groen K (1994) Pharmacokinetics of the enantiomers of bupivacaine following intravenous administration of the racemate. Br. J. Clin. Pharmacol. 38: 125-129.	Values for enantiomers were averaged.
85	Buprenorphine	52485-79-7	4.9	19	0.04	4.9	3.2	Kuhlman JJ, Lalani S, Magluilo, J, Levine B, Darwin WD, Johnson RE, and Cone EJ (1996) Human pharmacokinetics of intravenous, sublingual and buccal buprenorphine. J. Anal. Toxicol. 20: 369-378. Elkader A and Sproule B (2005) Buprenorphine: clinical pharmacokinetics in the treatment of opioid dependence. Clin. pharmacokinet. 44: 661-680.
86	Busulphan	55-98-1	0.55	2.4	1	3.8	3.4	Hassan M, Nilsson C, Hassan Z, Gungor T, Aschan J, Winiarski J, Hentschke P, Ringden O, Eber S, Seger R, and Ljungman P (2002) A phase II trial of liposomal busulphan as an intravenous myeloablative agent prior to stem cell transplantation: 500 mg/m(2) as a optimal total dose for conditioning. Bone Marrow Transplantation 30: 833-841. Ehrsson H and Hassan M (1984) Binding of busulfan to plasma pro…
87	Butorphanol	42408-82-2	12	41	0.17	5.3	4.8	Vachharajani NN, Shyu WC, Garnett WR, Morgenthien EA and Barbhaiya RH (1996) The absolute bioavailability and pharmacokinetics of butorphanol nasal spray in patients with hepatic impairment. Clin. Pharmacol. Ther. 60: 283-294. Gaver RC, Vasiljev M, Wong H, Monkovic I, Swigor JE, Van Harken DR, and Smyth RD (1980) Disposition of parenteral butorphanol in man. Drug Metab. Dispos. 8: 230-235.
88	Caffeine	58-08-2	0.63	1.4	0.64	7.5	4.9	Blanchard J and Sawers SJA (1983) Comparative pharmacokinetics of caffeine in young and elderly men. J. Pharmacokinet. Biopharm. 11: 109-126.	VDss was calculated from C vs t data obtained by digitization of the plot included in the reference.
89	Captopril	62571-86-2	0.75	12	0.73	1	2	Duchin KL, Singhvi SM, Willard DA, Migdalof BH, McKinstry DM (1982) Captopril kinetics. Clin. Pharmacol. Ther. 31: 452-458. Creasy WA, Morrison RA, Singhvi SM, and Willard DA (1988) Pharmacokinetics of intravenous captopril in healthy men. Eur. J. Clin. Pharmacol. 35: 367-370.	Combined data from Creasy and Duchin papers. Note that protein binding also has S-S bond component.
90	Carbenicillin	4697-36-3	0.17	1.9	0.52	1.5	1.1	Libke RD, Clarke JT, Ralph ED, Luthy RP, and Kirby WMM (1975) Ticarcillin vs carbenicillin: clinical pharmacokinetics. Clin. Pharmacol. Ther. 17: 441-446. Bergan T (1984) Pharmacokinetics of beta-lactam antibiotics. Scand. J. Infect. Dis. 42(Suppl): 83-98.
91	Carboplatin	41575-94-4	0.26	1.5	1	3	2	Elferink F, van der Vijgh WJ, Klein I, Vermorken JB, Gall HE, and Pinedo HM (1987) Pharmacokinetics of carboplatin after i.v. administration. Cancer Treatment Rep. 71: 1231-1237. Gaver RC, George AM, and Deeb G (1987) In vitro stability, plasma protein binding and blood cell partitioning of 14C-carboplatin. Cancer Chemother. Pharmacol. 20: 271-276.	Used 1.6 m2 = 60 kg since the study was done in all females.
92	Carmustine (BCNU)	154-93-8	1.2	78	0.23	0.26	0.37	Henner WD, Peters WP, Eder JP, Antman K, Schnipper L, and Frei E (1986) Pharmacokinetics and immediate effects of high-dose carmustine in man. Canc. Treatm. Rep. 70: 877-880.	Used VD as VDss because PK was first order.
93	Carumonam	87638-04-8	0.18	1.5	0.72	2	1.6	Weidekamm E, Kronenberger D, Portmann R, Stoeckel K, Egger HJ, and Dubach UC (1985) Single dose pharmacokinetics and absolute bioavailability of the new monocyclic .beta.-lactam carumonam (Ro 17-2301, AMA-1080). Recent Adv. Chemother., Proc. 14th Int. Congr. Chemother. (Antimicrobial Sect. 2), 1335-1336. Kita Y, Fugono T, and Imada A (1987) Pharmacokinetics of carumonam in experimental animals. C…	Ro 172301, AMA-1080.
94	Carvedilol	72956-09-3	1.3	7.8	0.02	2.8	2.4	Neugebauer G, Akpan W, Mollendorff E, Neubert P, and Reiff K (1987) Pharmacokinetics and disposition of carvedilol in humans. J. Cardiovasc. Pharmacol. 10(Suppl 11): S85-S88. Coreg Product Label.
95	Caspofungin	162808-62-0	0.13	0.14	0.035	15	27	Stone JA, Xu X, Winchell GA, Deutsch PJ, Pearson PG, Migoya EM, Mistry GC, Xi L, Miller A, Sandhu P, Singh R, deLuna F, Dilzer SC, Lasseter KC (2004) Disposition of caspofungin: role of distribution in determining pharmacokinetics in plasma. Antimic. Ag. Chemother. 48: 815-823.	VDss was calculated from rate micro-contants provided in the reference.
96	CB 10-277	7203-91-0	0.25	1.3	NF	3	2.5	Foster BJ, Newell DR, Carmichael J, Harris AL, Gumbrell LA, Jones M, Goodard PM, and Calvert AH (1993) Preclinical, phase I and pharmacokinetic studies with the dimethyl phenyltriazene CB10-277. Br. J. Canc. 67: 362-368.	Parameters were calculated using C vs t data obtained by digitzation of the plot provided in the reference.
97	Cefadroxil	50370-12-2	0.23	2.5	0.39	1.5	1.1	Marino EL, Dominguez-Gil A, and Muriel C (1982) Influence of dosage form and administration route on the pharmacokinetic parameters of cefadroxil. Int. J. Clin. Pharmacol. Ther. Toxicol. 20: 73-77. Aratani H, Kono S, Tateishi H, Negita S, and Yamanaka Y (1980) Pharmacological studies on cefadroxil. II. Pharmacokinetics. Chemotherapy 28(Suppl. 2): 75-82.
98	Cefamandole	34444-01-4	0.16	3.6	0.25	0.75	0.75	Brogard JM, Kopferschmitt J, Spach MO, Grudet O, and Lavillaureix J (1979) Cefamandole pharmacokinetics and dosage adjustments in relation to renal function. J. Clin. Pharmacol. 19: 366-377. Leroy A, Fillastre JP, Oksenhendler G, and Humbert G (1977) Pharmacokinetics of cefamandole in normal subjects and in uraemic patients. Drugs Exptl. Clin. Res. 3: 51-59. Bergan T (1984) Pharmacokinetics of be…	VDss and CL calculated from two-compartment terms listed in Brogard, et al. and from a digitized plot in Leroy, et al..
99	Cefatrizine	51627-14-6	0.22	3.3	0.4	1.1	1.2	Pfeffer M, Gaver RC, and Ximenez J (1983) Human intravenous pharmacokinetics and absolute oral bioavailability of cefatrizine. Antimicr. Ag. Chemother. 24: 915-920. Bergan T (1984) Pharmacokinetics of beta-lactam antibiotics. Scand. J. Infect. Dis. 42(Suppl): 83-98.	Analysis done by bioassay.
100	Cefazolin	25953-19-9	0.12	0.89	0.18	2.2	1.7	Chanson P, Joly V, Contrepois A, Garaud JJ, Bauchet J, Mohler J, Nguyen PC, and Carbon C (1987) Alteration of gentamicin and cefazolin kinetics with control of the hypothyroid state in humans. Antimic. Agents Chemother. 31: 645-637. Decroix MO, Zini R, Chaumeil JC, and Tillement JP (1988) Cefazolin serum protein binding and its inhibition by bilirubin, fatty acids and other drugs. Biochem. Pharma…	VDss assumed to be equal to reported VD in Chanson, et al., because 1st order kinetic model.
101	Cefcanel	41952-52-7	0.13	2.6	NF	0.83	1	Edwall B, Arvidsson A, Lake-Bakaar D, Lanbeck-Vallen K, and Yisak W (1993) Disposition of oral [14C]cefcanel daloxate hydrochloride in healthy male subjects. Drug Metab. Dispos. 21: 171-177.
102	Cefepime	88040-23-7	0.28	2.2	0.78	2.1	1.9	Kalman D, Barriere SL, Johnson BL (1992) Pharmacokinetic disposition and bactericidal activities of cefepime, ceftazidime, and cefoperazone in serum and blister fluid. Antimicrob. Agents Chemother. 36: 453-457. Barbhaiya RH, Forgue ST, Gleason CR, Knupp CA, Pittman KA, Weidler DJ, Movahhed H, Tenney J, and Martin RR (1992) Pharmacokinetics of cefepime after single and multiple intravenous adminis…
103	Cefetamet	65052-63-3	0.28	1.9	0.78	2.5	2.1	Koup JR, Dubach UC, Brandt R, Wyss R, and Stoeckel K (1988) Pharmacokinetics of cefetamet (Ro 15-8074) and cefetamet pivoxil (Ro 15-8075) after intravenous and oral doses in humans. Antimic. Ag. Chemother. 32: 573-579.	Ro 15-8074.
104	Cefixime	79350-37-1	0.24	1	0.31	3.9	3.2	Faulkner RD, Fernandez P, Lawrence G, Sia LL, Falkowski AJ, Weiss AI, Yacobi A, and Silber BM (1988) Absolute bioavailability of cefixime in man. J. Clin. Pharmacol. 28: 700-706.
105	Cefmetazole	56796-20-4	0.13	1.5	0.15	1.5	1.5	Ko H, Cathcart SK, Griffith DL, Peters GR, and Adams WJ (1989) Pharmacokinetics of intravenously administered cefmetazole and cefoxitin and effects of probenecid on cefmetazole elimination. Antimicr. Agents Chemother. 33: 356-361. Tan JS, Salstrom SJ, Signs SA, Hoffman HE, and File TM (1989) Pharmacokinetics of intravenous cefmetazole with emphasis on comparison between predicted theoretical leve…
106	Cefodizime	69739-16-8	0.054	0.61	0.18	1.5	4.2	Bryskier A, Procyk T, Tremblay D, Lenfant B, and Fourtillan JB (1990) The pharmacokinetics of cefodizime following intravenous and intramuscular administration of a single dose of 1.0 g. J. Antimic. Chemother. 26(Suppl C): 59-63. Scaglione F, Demartini G, Arcidiacono MM, Dugnani S, and Fraschini F (1997) Serum protein binding and extravascular diffusion of cefodizime and ceftriaxone. An in vivo s…	VDss calculated from C vs t data provided in the reference.
107	Cefoperazone	62893-19-0	0.17	1.3	0.07	2.2	1.8	Kalman D, Barriere SL, Johnson BL (1992) Pharmacokinetic disposition and bactericidal activities of cefepime, ceftazidime, and cefoperazone in serum and blister fluid. Antimicrob. Agents Chemother. 36: 453-457.
108	Ceforanide	60925-61-3	0.17	0.66	0.19	4.3	3	Pfeffer M, Gaver RC, and Van Harken DR (1980) Human pharmacokinetics of a new broad-spectrum parenteral cephalosporin antibiotic, ceforanide. J. Pharm. Sci. 69: 398-403.
109	Cefotaxime	63527-52-6	0.19	2.7	0.6	1.2	1.2	Wise R, Baker S, and Livingston R (1980) Comparison of cefotaxime and moxalactam pharmacokinetics and tissue levels. Antimic. Ag. Chemother. 18: 369-371. Esmieu F, Guilbert J, Rosenkilde HC, Ho I, LeGo A (1980) Pharmacokinetics of cefotaxime in normal human volunteers. J. Antimic. Chemother. 6(suppl A): 83-92.	VDss calculated from C vs t data provided in the reference..
110	Cefotetan	69712-56-7	0.13	0.42	0.15	5.2	4.5	Zimmerman J, Cohen A, and Thyrum P (1989) Absolute bioavailability and noncompartmental analysis of intravenous and intramuscular Cefotan (cefotetan) in normal volunteers. J. Clin. Pharmacol. 29: 151-157. Carver PL, Nightingale CH, and Quintiliani R (1989) Pharmacokinetics and pharmacodynamics of total and unbound cefoxitin and cefotetan in healthy volunteers. J. Antimic. Chemother. 23: 99-106.
111	Cefoxitin	35607-66-0	0.17	3.6	0.73	0.79	0.81	Ko H, Cathcart SK, Griffith DL, Peters GR, and Adams WJ (1989) Pharmacokinetics of intravenously administered cefmetazole and cefoxitin and effects of probenecid on cefmetazole elimination. Antimicr. Agents Chemother. 33: 356-361.
112	Cefpirome	84957-29-9	0.24	1.9	0.9	2.1	1.7	Nakayama I, Akieda Y, Yamaji E, Nitta Y, Ohishi M, Katagiri K, Imamura N, and Takase K (1992) Single- and multiple-dose pharmacokinetics of intravenous cefpirome (HR810) to healthy volunteers, J. Clin. Pharmacol. 32: 256-266. Tabata S, Shimura T, Maeda T, Hayashi S, Kobayashi I, and Saito A (1991) Protein binding of cefpirome sulfate in man and animals and its displacing effect on bilirubin bound…
113	Cefprozil	92665-29-7	0.21	2.9	0.59	1.2	1.2	Shyu WC, Shah VR, Campbell DA, Wilber RB, Pittman KA, and Barbhaiya RH (1992) Oral absolute bioavailability and intravenous dose-proportionality of cefprozil in humans. J. Clin. Pharm. 32: 798-803. Shyu WC, Shukla UA, Shah VR, Papp EA, and Barbhaiya RH (1991) Simultaneous high-performance liquid chromatographic analysis of cefprozil diastereomers in a pharmacokinetic study. Pharm. Res. 8: 992-996.	Racemate data
114	Ceftazidime	72558-82-8	0.31	2.4	0.79	2.2	1.8	Kalman D, Barriere SL, Johnson BL (1992) Pharmacokinetic disposition and bactericidal activities of cefepime, ceftazidime, and cefoperazone in serum and blister fluid. Antimicrob. Agents Chemother. 36: 453-457. Wise R, Armstrong GC, Brown RM, and Andrews JM (1981) The pharmacokinetics and tissue penetration of ceftazidime and cefamandole in healthy volunteers. J. Antimic. Chemother. 8(SupplB): 27…	VDss calculated for Wise et al from C vs t data provided in the reference. Plasma analysis done by bioassay.
115	Ceftizoxime	68401-81-0	0.2	2.1	0.72	1.6	1.5	Yamasaku F and Suzuki Y (1983) Pharmacokinetics of cefotaxime, ceftizoxime and cefmenoxime in healthy volunteers after i.v. constant infusion. Chemotherapy 31: 842-850. Peterson LR, Gerding DN, Van Etta, LL, Eckfeldt JH, and Larson TA (1982) Pharmacokinetics, protein binding, and extravascular distribution of ceftizoxime in normal subjects. Antimic. Agents Chemother. 22: 878-881.	VDss calculated from C vs t data provided in the reference.
116	Ceftobiprole	209467-52-7	0.27	1.5	0.62	3	3.3	Schmitt-Hoffmann A, Roos B, Schleimer M, Sauer J, Man A, Nashed N, Brown T, Perez A, Weidekamm E, and Kovacs P (2004) Single dose pharmacokinetics and study of a novel broad-spectrum cephalosporin (BAL5788) in healthy volunteers. Anitmic. Ag. Chemother. 48: 2570-2575. Hebeisen P, Heinze-Krauss I, Angehrn P, Hohl P, Page MGP, Then RL (2001) In Vitro and In Vivo Properties of Ro 63-9141, a Novel Br…	Administered as a prodrg BAL-5788.
117	Ceftriaxone	73384-59-5	0.085	0.26	0.052	5.4	8.6	McNamara PJ, Gibaldi M, and Stoekel K (1983) Volume of distribution terms for a drug (ceftriaxone) exhibiting concentration-dependent protein binding II. Physiological significance. Eur. J. Clin. Pharmacol. 25: 407-412. Martin C, Ragni J, Lokiec F, Guillen JC, Auge A, Pecking M, and Gouin F (1992) Pharmacokinetics and tissue penetration of a single dose of ceftriaxone (1,000 milligrams intravenou…	Protein binding is concentration dependent; value is the average between doses of 150-3000 mg.
118	Cefuroxime	55268-75-2	0.15	2.2	0.12-0.60	1.1	1.1	Gower PE and Dash CH (1977) The pharmacokinetics of cefuroxime after intravenous injection. Eur. J. Clin. Pharmacol. 12: 221-227. Benson JM, Boudinot FD, Pennell AT, Cunningham FE, and DiPiro JT (1993) In vitro protein binding of cefonicid and cefuroxime in adult and neonatal sera. Antimic. Agents Chemother. 37: 1343-1347.	VDss calculated from reported micro rate constants. Concentration dependent protein binding.
119	Cephalexin	15686-71-2	0.21	3.9	0.85	0.89	0.57	Kirby WMM and De Maine JB (1971) Pharmacokinetics of the cephalosporins in healthy volunteers and uremic patients. Postgrad. Med. J. Suppl. 47(Cephalosporin Antibiotics): 41-46.	Pharamacokinetic parameters calculated from C vs t data obtained by digitization of plots included in the reference.
120	Cephaloridine	50-59-9	0.46	3.3	0.8	2.3	1.5	Brogard JM, Brandt C, Dorner M, and Dammron A (1976) Adjustment of cephaloridine (Keflodin). Dosage according to its pharmacokinetics. Chemotherapy 22: 1-11. Bergan T (1984) Pharmacokinetics of beta-lactam antibiotics. Scand. J. Infect. Dis. 42(Suppl): 83-98.	VDss calculated from digitized C vs t plot provided in the report.
121	Cephalothin	153-61-7	0.07	1.8	0.22	0.65	0.95	Bergan T (1977) Comparatve pharmacokinetics of cefazolin, cephalothin, cephacetril, and cephapirine after intravenous administration. Chemother. 23: 389-404. Kuroyama M, Kumano K, Motohashi S, Kimura T, Murase S, and Tomonaga F (1992) Protein binding of 14 cephems in healthy subjects and patients with chronic renal failure. Chemotherapy 40: 898-908.
122	Cephapirin	21593-23-7	0.13	2.7	0.55	0.8	1.2	Bergan T (1977) Comparatve pharmacokinetics of cefazolin, cephalothin, cephacetril, and cephapirine after intravenous administration. Chemother. 23: 389-404.
123	Cephradine	38821-53-3	0.21	3.3	0.95	1.1	0.85	Rattie ES, Bernardo PD, and Ravin LJ (1976) Pharmacokinetic interpretation of cephradine levels in serum after intravenous and extravascular administration in humans. Antimic. Ag. Chemother. 10: 283-287. Bergan T (1984) Pharmacokinetics of beta-lactam antibiotics. Scand. J. Infect. Dis. 42(Suppl): 83-98.	VDss estimated from C vs t data obtained by digitzation of plots provided in the reference.
124	Cerivastatin	145599-86-6	0.33	2.9	0.01	1.8	1.8	Muck W, Ritter W, Ochmann K, Unger S, Ahr G, Wingender W, and Kuhlmann J (1997) Absolute and relative bioavailability of the HMG-CoA reductase inhibitor cerivastatin. Int. J. Clin. Pharmacol. Ther. 35: 255-260. Baycol Product Label.
125	Cetrorelix	120287-85-6	0.39	1.2	0.14	5.4	12	Pechstein B, Nagaraja NV, Hermann R, Romeis P, Locher M, and Derendorf H (2000) Pharmacokinetic-pharmacodynamic modeling of testosterone and luteinizing hormone suppression by cetrorelix in healthy volunteers. J. Clin. Pharmacol. 40: 266-274. Cetrotide Product Label.	VDss calculated from reported micro rate constants.
126	Chlorambucil	305-03-3	0.26	2.8	0.01	1.5	1.1	Newell DR, Calvert AH, Harrap KR, and McElwain TJ (1983) Studies on the pharmacokinetics of chlorambucil and prednimustine in man. Br. J. Clin. Pharmacol. 15: 253-258. Leukeran Product Label.	VDss calculated from C vs t data obtained by digitization of plots provided in the reference for two subjects administered a 10 mg dose.
127	Chloramphenicol	56-75-7	0.94	2.4	0.34	6.5	4.6	Narang APS, Datta DV, Nath N, and Mathur VS (1981) Pharmacokinetic study of chloramphenicol in patients with liver disease. Eur. J. Clin. Pharmacol. 20: 479-483. Kurz H, Mauser-Ganshorn A, and Stickel HH (1977) Differences in the binding of drugs to plasma proteins from newborn and adult man. I. Eur. J. Clin. Pharmacol. 11: 463-467.	One compartment pharmacokinetics, so VDc = VDss.
128	Chlorazepate	23887-31-2	0.2	1.1	NF	3	2.4	Bertler A, Lindgren S, Magnusson JO, and Malmgren H (1983) Pharmacokinetics of chlorazepate after intravenous and intramuscular administration. Psychopharmacol. 80: 236-239.	VDss calculated from digitized C vs t plot provided in the report.
129	Chlordiazepoxide	58-25-3	0.25	0.37	0.056	11	8.3	Desmond PV, Patwardhan RV, Schenker S, and Hoyumpa AM (1980) Short-term ethanol administration impairs the elimination of chlordiazepoxide (Librium) in man. Eur. J. Clin. Pharmacol. 18: 275-278. Boxenbaum HG, Geitner KA, Dixon WR, Spiegel HE, Symington J, Christian R, Moore JD, Weissman L, and Kaplan SA (1977) Pharmacokinetic and biopharmaceutic profile of chlordiazepoxide HCl in healthy subjects…
130	Chlormethiazole	533-45-9	6.6	33	0.36	3.3	4.5	Neuvonen PJ, Pentikainen PJ, Jostell KG, and Syvalahti E (1981) Effect of ethanol on the pharmacokinetics of chlormethiazole in humans. Int. J. Clin. Pharmacol. Ther. Toxicol. 19: 552-560. Jostell KG, Agurell S, Allgen LG, Kuylenstierna B, Lindgren JE, Aberg G, and Osterlot G (1978) Pharmacokinetics of clomethiazole in healthy adults. Acta Pharmacol. Toxicol. 43: 180-189. Moore RG, Triggs EJ, Sha…	VDss calculated from reported micro rate constants in the references by Moore, et al., and Jostell, et al.
131	Chlorophenylpiperazine, m-	51639-49-7	2.5	6.1	NF	7	4.7	Feuchtl A, Bagli M, Stephan R, Frahnert C, Kolsch H, Kuhn KU, and Rao ML (2004) Pharmacokinetics of m-chlorophenylpiperazine after intravenous and oral administration in healthy male volunteers: implications for the pharmacodynamic profile. Pharmacopsychiatry 37: 180-188.
132	Chloroquine	54-05-7	140	4.1	0.43	740	570	White NJ (1985) Clinical pharmacokinetics of antimalaria drugs. Clin. Pharmacokinet. 10: 187-215. Aderounmu AF, Salako LA, Lindstroem B, Walker O, and Ekman L (1986) Comparison of the pharmacokinetics of chloroquine after single intravenous and intramuscular administration in healthy Africans. Br. J. Clin. Pharmacol. 22: 559-564.
133	Chlorpheniramine	132-22-9	3.3	2.5	0.7	22	22	Huang SM, Athanikar NK, Sridhar K, Huang YC, and Chiou WL (1982) Pharmacokinetics of chlorpheniramine after intravenous and oral administration in normal adults. Eur. J. Clin. Pharmacol. 22: 359-365. Hiep BT, Gimenez F, Khanh V, Hung NK, Thuillier A, Farinotti R, and Fernandez C (1999) Binding of chlorpheniramine enantiomers to human plasma proteins. Chirality 11: 501-504.
134	Chlorpromazine	50-53-3	10	16	0.056	10	11	Yeung PKF, Hubbard JW, Korchinski ED, and Midha KK (1993) Pharmacokinetics of chlorpromazine and key metabolites. Eur. J. Clin.Pharmacol. 45: 563-569. Koytchev R, Alken RG, Kirkov V, Neshev G, Vagaday M, and Kunter U (1994) Absolute bioverfugbarkeit von chlorpromazin, promazin, und promethazin. Arz. Forsch. 44: 121-125. Curry SH (1970) Plasma protein binding of chlorpromazine. J. Pharm. Pharmacol…	VDss was calculated from C vs t data obtained by digitization of the plot included in the reference. Protein binding value cited is at a concentration observed in the pharmacokinetic study.
135	Chlorpropamide	94-20-2	0.19	0.045	0.03	70	46	Huupponen R and Lammintausta R (1981) Chlorpropamide bioavailability and pharmacokinetics. Int. J. Clin. Pharmacol. Ther. Toxicol. 19: 331-333.	VDss was calculated from C vs t data obtained by digitization of the plot included in the reference.
136	Chlortetracycline	57-62-5	0.9	2	0.52	7.4	7	Kunin CM, Darnbush AC, and Finland M (1959) Distribution and excretion of four tetracycline analogs in normal young men. J. Clin. Invest. 38: 1950-1963.	Parameters were calculated from C vs t data obtained by digitization of the plot included in the reference.
137	Chlorthalidone	77-36-1	3.9	1.5	0.24	43	36	Fleuren HLJ, Thien TA, Verwey-van Wissen CPW, and von Rossum JM (1979) Absolute bioavailability of chlorthalidone in man: a cross over study after intravenous and oral administration. Eur. J. Clin. Pharmacol. 15: 35-50. Dieterle W, Wagner J, and Faigle JW (1976) Binding of chlorthalidone (Hygroton) to blood components in man. Eur. J. Clin. Pharmacol. 10: 37-42.
138	Cibenzoline	53267-01-9	4.1	8.6	0.5	7.8	7.3	Cifenline. Aronoff G, Brier M, Mayer ML, Barbalas M, Aogaichi K, Sloan R, Brazzell R, and Massarella J (1991) Bioavailability and kinetics of cibenzoline in patients with normal and impaired renal function. J. Clin. Pharmacol. 31: 38-44. Reidenberg MM, Lorenzo BJ, Drayer DE, Kluger J, Nestor T, Regnier JC, Kowal BA, and Bekersky I (1988) A nonradioactive iothalamate method for measuring glomerula…
139	Cicaprost	94079-80-8	0.08	3.8	NF	0.35	1.1	Hildebrand M, Staks T, Schutt A, and Matthes H (1989) Pharmacokinetics of 3H-cicaprost in healthy volunteers. Prostaglandins 37: 259-273.	VDss was calculated from MRT from a paper cited in the reference.
140	Cidofovir	113852-37-2	0.49	2.5	1	3.3	2.6	Cundy KC, Petty BG, Flaherty J, Fisher PE, Polis MA, Wachsman M, Lietman PS, Lalezari JP, Hitchcock MJM, and Jaffe HS (1995) Clinical pharmacokinetics of cidofovir in human immunodeficiency virus-infected patients. Antimic. AgentsChemother. 39: 1274-1282.
141	Cilastatin	82009-34-5	0.15	2.3	0.6	1.1	0.86	Saito A (1991) Pharmacokinetics of panipenem/betamipron. Chemotherapy 39(Suppl. 3): 227-235. Primaxin IV Product Label.	VDss calculated from C vs t data provided in the reference.
142	Cilomilast	153259-65-5	0.23	0.5	0.006	8.5	7.9	Zussman BD, Davie CC, Kelly J, Murdoch RD, Clark DJ, Schofield JP, Walls C, Birrell C, Webber D, Quinlan J, Ritchie SY, and Carr A (2001) Bioavailability of the oral selective phosphodiesterase 4 inhibitor cilomilast. Pharmacother. 21: 653-660. Down G, Siederer S, Lim S, and Daley-Yates P (2006) Clinical pharmacology of cilomilast. Clin. Pharmacokinet. 45: 217-233.
143	Cimetidine	51481-61-9	1.2	8.1	0.78	2.5	2.2	Arancibia A, Schindler I, Paccot E, Ruiz I, Gonzalez G, Mella F, and Thambo S (1985) Pharmacicinetique de la cimetidine apres administration d'une dose unique par voie intraveineuse rapide et d'une autre par voie orale. Therapie 40: 87-92. Bauer LA, Wareing-Tran C, Edwards WAD, Raisys V, Ferreri L, Jack R, Dellinger EP, and Simonowitz D (1985) Cimetidine clearance in the obese. Clin. Pharmacol. T…
144	Ciprofloxacin	85721-33-1	2.1	8.3	0.7	4.2	3.8	Bergogne-Berezin E (2002) Clinical role of protein binding of quinolones. Clin. Pharmacokinet 41: 741-750. Jaehde U, Soergel F, Reiter A, Sigl G, Naber KG, and Schunack W (1995) Effect of probenecid on the distribution and elimination of ciprofloxacin in humans. Clin. Pharmacol. Ther. 58: 532-541. Lettieri JT, Rogge MC, Kaiser L, Echols RM, and Heller AH (1992) Pharmacokinetic profiles of ciprofl…
145	Cisatracurium	96946-41-7	0.14	5.4	0.62	0.43	0.42	Bergeron LB, Bevan DR, Berrill A,Kahwaji R, and Varin F (2001) Concentration–Effect Relationship of Cisatracurium at Three Different Dose Levels in the Anesthetized Patient. Anesthesiology 95: 314-323. Roy JJ and Varin F (2004) Physicochemical properties of neuromuscular blocking agents and their impact on the pharmacokinetic-pharmacodynamic relationship. Br. J. Anaesth. 93: 241-248.
146	Citalopram	59729-33-8	12	4.3	0.2	47	33	Joffe P, Larsen FS, Pedersen V, Ring-Larsen H, Aaes-Jorgensen T, and Sidhu J (1998) Single-dose pharmacokinetics of citalopram in patients with moderate renal insufficiency or hepatic cirrhosis compared with healthy subjects. Eur. J. Clin. Pharmacol. 54: 237-242. Celexa Product Label.	VDss calculated from C vs t data obtained by digitization of the plot provided in the reference.
147	Cladribine	4291-63-8	7.7	14	0.79	9.2	16	Saven A, Cheung WK, Smith L, Moyer M, Johannsen T, Rose E, Gollard R, Kosty M, Miller WE, and Piro LD (1996) Pharmacokinetic study of oral and bolus intravenous 2-chlorodeoxyadenosine in patients with malignancy. J. Clin. Oncol. 14: 978-983. Albertioni F, Herngren L, Juliusson G, and Liliemark J (1994) Protein binding of 2-chloro 2'-deoxyadenosine (cladribine) in healthy subjects and in patients …
148	Clarithromycin	81103-11-9	1.5	7.3	0.23	3.4	2.8	Chu SY, Deaton R, and Cavanaugh J (1992) Absolute bioavailability of clarithromycin after oral administration in humans. Antimic. Ag. Chemother. 36: 1147-1150. Kuroyama M, Motohashi S, Kumano K, and Yago K (1996) Protein binding of clarithromycin in patients with chronic renal failure. Jap. J. Antibiotics 49: 256-263. Davey PG (1991) The pharmacokinetics of clarithromycin and its 14-OH metabolite…	VDss calculated from C vs t sata obtained by digitization of the plot provided in the reference
149	Clavulanic Acd	58001-44-8	0.22	3.1	0.91	1	0.9	Davies BE, Boon R, Horton R, Reubi FC, and Descoeudres CE (1988) Pharmacokinetics of amoxycillin and clavulanic acid in haemodialysis patients following intravenous administration of Augmentin. Br. J. Clin. Pharmacol. 26: 385-390. de la Pena A and Derendorf H (1999) Pharmacokinetic properties of beta-lactamase inhibitors. Int. J. Clin. Pharmacol. Ther. 37: 63-75.
150	Clevidipine	167221-71-8	0.58	142	0.0038	0.07	0.3	Ericsson H, Fakt C, Hoglund L, Jolin-Mellgard A, Nordlander M, Sunzel M, and Regardh CG (1999) Pharmacokinetics and pharmacodynamics of clevidipine in healthy volunteers after intravenous infusion. Eur. J. Clin. Pharmacol. 55: 61-67. Ericsson H, Tholander B, and Regardh CG (1999) In vitro hydrolysis rate and protein binding of clevidipine, a new ultrashort-acting calcium antagonist metabolized by…	Data for the enantiomers are averaged.
151	Clinafloxacin	105956-97-6	1.9	4.7	0.96	6.7	5.4	Randinitis EJ, Brodfuehrer JI, Eiseman I, and Vassos AB (2001) Pharmacokinetics of clinafloxacin after single and multiple doses. Antimic. Agents Chemother. 45: 2529-2535. Wise R, Ashby JP, and Andrews JM (1988) In vitro activity of PD 127,391, an enhanced-spectrum quinoline. Antimic. Agents Chemother. 32: 1251-1256.
152	Clindamycin	18323-44-9	0.79	4.5	0.06	2.9	2.1	Gatti G, Flaherty J, Bubp J, White J, Borin M, and Gambertoglio J (1993) Comparative study of bioavailabilities and pharmacokinetics of clindamycin in healthy volunteers and patients with AIDS. Antimic. Agents Chemother. 37: 1137-1143. Gordon RC, Regamey C, and Kirby WMM (1973) Serum protein binding of erythromycin, lincomycin, and clindamycin. J. Pharm. Sci. 62: 1074-1077.
153	Clomipramine	303-49-1	13	8.2	0.029	26	26	Ollagnier M, Pellet J, Gay JP, Lang F, Ouvry MC, and Blanchon Y (1984) Pharmacocinetique d'une dose unique de clomipramine, en intraveneuse, chez le voluntaire sain. Therapie 39: 237-245. Nyberg G and Maartensson E (1984) Determination of free fractions of tricyclic antidepressants. Naunyn-Sch. Arch. Pharmacol. 327: 260-265.	Pharmacokinetic parameters were calculated from C vs t provided in the reference.
154	Clonazepam	1622-61-3	2.9	0.88	0.15	55	38	Crevoisier C, Delisle MC, Joseph I, and Foletti G (2003) Comparative single-dose pharmacokinetics of clonazepam following intravenous, intramuscular and oral administration to healthy volunteers. Eur. Neurol. 49: 173-177. Lucek RW and Coutinho CB. (1976) The role of substituents in the hydrophobic binding of the 1,4-benzodiazepines by human plasma proteins. Molec. Pharmacol. 12: 612-19.	VDss calculated using C vs t data obtained by digitization of the plot included in the reference.
155	Clonidine	4205-90-7	3.3	4	0.56	14	7.6	Vanholder R, Van Landschoot N, De Smet R, Schoots A, and Ringoir S (1988) Drug protein binding in chronic renal failure: evaluation of nine drugs. Kidney Int. 33: 996-1004. Frisk-Holmberg M, Paalzow L, and Edlund PO (1981) Clonidine kinetics in man-evidence for dose dependency and changed pharmacokinetics during chronic therapy. Br. J. Clin. Pharmacol. 12: 653-658.	Used 1.27 mg/kg dose level data from Frisk-Holmberg et al. VDss calculated from reported exponential fit parameters.
156	Clozapine	5786-21-0	1.6	2.5	0.055	11	10	Cheng YF, Lundberg T, Bondesson U, Lindstrom L, and Gabrielsson J (1988) Clinical pharmacokinetics of clozapine in chronic schizophrenic patients. Eur. J. Clin. Pharmacol. 34: 445-449. Schaber G, Stevens I, Gaertner HJ, Dietz K, and Breyer-Pfaff U (1998) Pharmacokinetics of clozapine and its metabolites in psychiatric patients: plasma protein binding and renal clearance. Br. J. Clin. Pharmacol. 4…
157	Cocaethylene	529-38-4	1.6	13	0.64	2	1.5	Perez-Reyes M, Jeffcoat AR, Myers M, Sihler K, and Cook CE (1994) Comparison in humans of the potency and pharmacokinetics of intravenously injected cocaethylene and cocaine. Psychopharmacol. 116: 428-432. Bailey DN (1997) Effect of drugs and cocaine metabolites on cocaine and cocaethylene binding to uman serum in vitro. Ther. Drug Monit. 19: 427-430.	Parameters were calculated from C vs t data obtained by digitization of plots in the reference.
158	Cocaine	50-36-2	2	32	0.12	1	0.76	Chow MJ, Ambre JJ, Ruo TI, Atkinson AJ, Bowsher DJ, and Fischman MW (1985) Kinetics of cocaine distribution, elimination, and chronotropic effects. Clin. Pharmacol. Ther. 38: 318-324. Javaid JI, Musa MN, Fischman M, Schuster CR, and Davis JM (1983) Kinetics of cocaine in humans after intravenous and intranasal administration. Biopharm. Drug Dispos. 4: 9-18. Edwards DJ and Bowles SK (1988) Protein…	Paper by Javaid, et al. reported one compartment kinetics so VDss = C0/Dose.
159	Codeine	76-57-3	3.5	15	0.7	3.9	4	Guay DRP, Awni WM, Findlay JWA, Halstenson CE, Abraham PA, Opsahl JA, Jones EC, and Matzke GR (1988) Pharmacokinetics and pharmacodynamics of codeine in end-stage renal disease. Clin. Pharmacol. Ther. 43: 63-71. Mohammed SS, Christopher MM, Mehta P, Kedar A, Gross S, and Derendorf H (1993) Increased erythrocyte and protein binding of codeine in patients with sickle cell disease. J. Pharm. Sci. 82…
160	Colchicine	64-86-8	6.1	2.1	0.61	49	58	Ferron GM, Rochdi M, Jusko WJ, and Scherrmann JM (1996) Oral absorption characteristics and pharmacokinetics of colchicine in healthy volunteers after single and multiple doses. J. Clin. Pharmacol. 36: 874-883. Sabouraud A, Chappey O, Dupin T, and Scherrmann JM (1994) Binding of colchicine and thiocolchicoside to human serum proteins and blood cells. Int. J. Clin. Pharmacol. Ther. 32: 429-432.
161	Conivaptan	210101-16-9	0.76	3	0.01	4.2	6.7	Vaprisol Product Label	VDss was calculated using C vs t data obtained by digitization of the plot provided in the product label.
162	Cotinine	486-56-6	1.1	0.89	NF	21	17	Scherer G, Jarczyk L, Heller WD, Biber A, Neurath GB, and Adlkofer F (1988) Pharmacokinetics of nicotine, cotinine, and 3'-hydroxycotinine in cigarette smokers. Klin. Wochenschr. 66(Supp 11): 5-11. Curvall M, Elwin CE, Kazemi-Vala E, Warholm C, and Enzell CR (1990) The pharmacokinetics of cotinine in plasma and saliva from non-smoking healthy volunteers. Eur. J. Clin. Pharmacol. 38: 281-287.	VDss calculated from C vs t data obtained by digitization of the plots provided in the references.
163	Cyclophosphamide	50-18-0	0.73	1.1	0.87	11	8	Juma FD, Rogers HJ, and Trounce JR (1979) Pharmacokinetics of cyclophosphamide and alkylating activity in man after intravenous and oral administration. Br. J. Clin. Pharmacol. 8: 209-217. Juma FD, Rogers HJ, and Trounce JR (1979) The kinetics of salivary elimination of cyclophosphamide in man. Br. J. Clin. Pharmacol. 8: 455-458.	VDss calculated from microconstants reported in the reference.
164	Cyclosporine	59865-13-3	3.3	7.5	0.068	7.3	7.3	Legg B, Gupta SK, Rowland M, Johnson RWG, and Solomon LR (1988) Cyclosporin: pharmacokinetics and detailed studies of plasma and erythrocyte binding during intravenous and oral administration. Eur. J. Clin. Pharmacol. 34: 451-460. Min DI, Lee M, Ku YM, and Flanigan M (2000) Gender-dependent racial difference in disposition of cyclosporine among healthy African American and white volunteers. Clin.…	Reported whole blood parameters converted to plasma parameters using a blood/plasma ratio of 1.3.
165	Dacarbazine	4342-03-4	1.2	2.6	1	7.8	6.2	Loo TL, Housholder GE, Gerulath AH, Saunders PH, and Farquhar D (1976) Mechanism of action and pharmacology studies with DITC (NSC-45388) Canc. Treatment Rep. 60: 149-152. DITC-DOME Product Label	Parameters calculated from C vs t data obtained by digitization of a plot provided in the reference.
166	Dalbavancin	171500-79-1	0.14	0.01	0.02	230	170	Leighton A, Gottlieb AB, Dorr MB, Jabes D, Mosconi G, VanSaders C, Mroszczak EJ, Campbell KCM, and Kelly E (2004) Tolerability, pharmacokinetics, and serum bactericidal activity of intravenous dalbavancin in healthy volunteers. Antimic. Agents Chemother. 48: 940-945. Jabés D, Candiani G, Romanó G, Brunati C, Riva S, and Cavaleri M (2004) Efficacy of Dalbavancin against Methicillin-Resistant Staph…
167	Dalfopristin	112362-50-2	0.39	16	0.82	0.41	0.74	Chevalier P, Rey J, Pasquier O, Rouzier-Panis R, Harding N, and Montay G (2001) Multiple-dose pharmacokinetics and safety of two regimens of quinupristine/dalfopristin (Synercid) in healthy volunteers. J. Clin. Pharmacol. 41: 404-414. Bergeron M and Montay G (1997) The pharmacokinetics of quinupristin/dalfopristin in laboratory animals and in humans. J. Antimic. Chemother. 39(Supp. A): 129-138. B…
168	Dantrolene	7261-97-4	0.37	0.43	NF	14	10	Podranski T, Boullion T, Schumacher PM, Taguchi A, Sessler DI, and Kurz A (2005) Compartmental pharmacokinetics of dantrolene in adults: do malignant hyperthermia association dosing guidelines work? Anesth. Analg. 101: 1695-1699.
169	Dapsone	80-08-0	0.83	0.48	0.25	29	22	Pieters FAMJ and Zuidema J (1987) The absolute bioavailability of dapsone in dogs and humans. Int. J. Clin. Pharmacol. Ther. Toxicol. 25: 396-400. Biggs JT and Levy L (1971) Binding of dapsone and monacetyldapsone by human plasma proteins. Proc. Soc. Exp. Biol. Med. 137: 692-695.	VDss calculated from C vs t data obtained by digitization of plot provided in the reference.
170	Daptomycin	103060-53-3	0.088	0.16	0.083	9.2	8.1	Dvorchik BH, Brazier D, DeBruin MF, and Arbeit RD (2003) Daptomycin pharmacokinetics and safety following administration of escalating doses once daily to healthy subjects. Antimic. Agents Chemother. 47: 1318-1323. Woodworth JR, Nyhart EH, Brier GL, Wolny JD, and Black HR (1992) Single dose pharmacokinetics and antibacterial activity of daptomycin, a new lipopeptide antibiotic, in healthy volunte…	VDss calculated from C vs t data obtained by digitization of plot provided in the Benvenuto, et al. references.
171	Darifenacin	133099-04-4	2.6	12	0.02	3.6	3.6	Skerjanec A (2006) The clinical pharmacokinetics of darifenacin. Clin. Pharmacokinet. 45: 325-350. Enablex Product Label.	Pharmacokinetic parameters were calculated from C vs t data obtained by digitization of the plot provided in the reference.
172	Decitabine	2353-33-5	4.6	130	1	0.59	0.58	van Groeningen CJ, Leyva A, O'Brien AMP, Gall HE, and Pinedo HM (1986) Phase I and pharmacokinetic study of 5-aza-2'-deoxycytidine (NSC 127716) in cancer patients. Cancer Res. 46: 4831-4836. Dacogen Product Label.
173	Delorazepam (Chlordesmethyldiazepam)	2894-67-9	2.2	0.17	0.051	220	200	Bareggi SR, Pirola R, Potvin P, and Devis G (1995) Effects of liver disease on the pharmacokinetics of intravenous and oral chlordesmethyldiazepam. Eur. J. Clin. Pharmacol. 48: 265-268. Sennesael J, Verbeelen D, Vanhaelst L, Pirola R, and Bareggi SR (1991) Pharmacokinetics of intravenous and oral chlordesmethyldiazepam in patients on regular haemodialysis. Eur. J. Clin. Pharmacol. 41:65-68. Lucek…	Parameters were determined from C vs t data obtained by digitization of the C vs t plots for normal subjects provided in the references and averaged (N=2).
174	Demethylchlortetracycline	127-33-3	1.3	1.1	0.59	17	12	Kunin, CM, Darnbush AC, and Finland M (1959) Distribution and excretion of four tetracycline analogs in normal young men. J. Clin. Invest. 38: 1950-63.	Calculated from digitized plots
175	Denaverine	3579-62-2	7.1	5.7	NF	21	34	Staab A, Schug BS, Larsimont V, Elze M, Thummler D, Mutschler E, and Blume H (2003) Pharmacokinetics and bioavailability of denaverine hydrochloride in healthy subjects following intravenous, oral, and rectal single doses. Eur. J. Pharm. Sci. 18: 121-128.
176	Desacetylpaclitaxel, 4-; 4-methyl carbonate	172481-83-3	6.9	8.6	NF	13	31	du Bois A, Jung B, Loehr A, Schaller-Kranz T, Cohen M, Frickhofen N (2006) A phase I and pharmacokinetic study of novel taxane BMS-188797 and cisplatin in patients with advanced solid tumours. Br. J. Cancer. 94: 79-84.
177	Desipramine	50-47-5	15	11	0.16	23	22	Ciraulo DA, Barnhill JG, and Jaffe JH (1988) Clinical pharmacokinetics of imipramine and desipramine in alcoholics and normal volunteers. Clin. Pharmacol. Ther. 43: 509-518. Brosen K and Gram LF (1988) First-pass metabolism of imipramine and desipramine: impact of the sparteine oxidation phenotype. Clin. Pharmacol. Ther. 43: 400-406. Nyberg G and Maartensson E (1984) Determination of free fractio…	VDss calculated from C vs t data obtained by digitization of plots provided in the references. Data from CYP2D6 poor metabolizers not included.
178	Desmethyldiazepam	1088-11-5	0.45	0.12	0.03	63	46	Klotz U, Antonin KH, Brugel H, and Bieck PR (1977) Disposition of diazepam and its major metabolite desmethyldiazepam in patients with liver disease. Clin. Pharmacol. Ther. 21: 430-436. Lucek RW and Coutinho CB. (1976) The role of substituents in the hydrophobic binding of the 1,4-benzodiazepines by human plasma proteins. Molec. Pharmacol. 12: 612-619.
179	Desmopressin	16679-58-6	0.3	1.4	NF	3.6	3	Rembratt A, Graugaard-Jensen C, Senderovitz T, Norgaard, JP, and Djurhuus JC (2004) Pharmacokinetics and pharmacodynamics of desmopressin administered orally versus intravenously at daytime versus night-time in healthy men aged 55-70 years. Eur. J. Clin. Pharmacol. 60: 397-402.
180	Dexamethasone	50-02-2	0.94	3.3	0.32	4.74747	3.7	Rose JQ, Yurchak AM, Meikle AW, and Jusko WJ (1981) Effect of smoking on prednisone, prednisolone, and dexamethasone pharmacokinetics. J. Pharmacokinet. Biopharm. 9: 1-14. Tsuei SE, Moore RG, Ashley JJ, and McBride WG (1979) Disposition of synthetic glucocorticoids. I. Pharmacokinetics of dexamethasone in healthy adults. J. Pharmacokinet. Biopharm. 7: 249-264.
181	Dexfenfluramine	3239-44-9	11	11	0.66	18	14	Cheymol G, Weissenburger J., Poirier JM, Gellee C. (1995) The pharmacokinetics of dexfenfluramine in obese and non-obese subjects. Br. J. Clin. Pharmacol. 39: 684-687. De la Torre R, Farre M, Navarro M, Pacifici R, Zuccaro P, and Pichini S (2004) Clinical pharmacokinetics of amfetamine and related substances: monitoring in conventional and non-conventional matrices. Clin. Pharmacokinet. 43: 157-1…
182	Dexloxiglumide	119817-90-2	0.18	3.7	0.024	0.79	1.2	Webber C, Roth A, Persiani S, Peard AJ, Makovec F, Kapil RP, John BA, Holding JD, D'Amato M, Cybulski, ZR, Chasseaud LF, and Rovati LC (2003) Pharmacokinetics and metabolism of the cholecystokinin antagonist dexloxiglumide in male human subjects. Xenobiotica 33: 625-641.	Protein binding data for 1 ug/mL concentration is included.
183	Dexmedetomidine	145108-58-3	1.6	11	0.06	2.5	2.2	Anttila A, Penttila J, Helminen A, Vuorilehto L, and Scheinin H (2003) Bioavailability of dexmedetomidine after extravascular doses in healthy subjects. Br. J. Clin. Pharmacol. 56: 691-693. Precedex Product Label.
184	Dexniguldipine	120054-86-6	8.4	9.3	NF	15	22	Goedhals L, Bezwoda WR, Abratt RP, Rathgeb F, Goebel KJ, and Wurst W (1995) Bioavailability and pharmacokinetic characteristics of dexniguldipine-HCl, a new anticancer drug. Int. J. Clin. Pharmacol. Ther. 33: 664-669.	VDss calculated from C vs t data obtained by digitization of plots provided in the reference.
185	Dexrazoxane	24584-09-6	0.55	3.1	1	3	2.5	Rosing H, Ten Bokkel Huinink WW, Van Gijn R, Rombouts RFM, Bult A, and Beijnen JH (1999) Comparative open, randomized, cross-over bioequivalence study of two intravenous dexrazoxane formulations (Cardioxane and ICRF-187) in patients with advanced breast cancer, treated with 5-fluorouracil-doxorubicin-cyclophosphamide (FDC). Eur. J. Drug Metab. Pharmacokinet. 24: 69-77. Zinecard Product Label.
186	DHA Paclitaxel	199796-52-6	0.068	0.025	0.0038	45	60	Sparreboom A, Wolff AC, Verweij J, Zabelina Y, van Zomeren DM, McIntire GL, Swindell CS, Donehower RC, and Baker SD (2003) Disposition of docosahaenoic acid-paclitaxel, a novel taxane, in blood: in vitro and clinical pharmacokinetic studies. Clin. Cancer Res. 9: 151-159.	Pharmacokinetic paremeters were calculated from C vs t data obtained by digitization of the plot provided in the reference.
187	Diatrizoic Acid (Amidotrizoate)	117-96-4	0.26	1.7	1	2.6	1.8	Feldman S, Hayman LA, and Hulse M (1984) Pharmacokinetics of low- and high-dose intravenous diatrizoate contrast media administration. Invest. Radiol. 19: 54-57. Back SE, Krutzen E, and Nilsson-Ehle P (1988) Contrast media as markers for glomerular filtration: a pharmacokinetic comparison of four agents. Scand. J. Clin. Lab Invest. 48: 247-253.
188	Diazepam	439-14-5	1	0.38	0.023	44	42	Klotz U, Avant GR, Hoyumpa A, Schenker S, and Wilkinson (1975) The effects of age and liver disease on the disposition and elimination of diazepam in adult man. J. Clin. Invest. 55: 347-359. Andersson T, Andren K, Cederberg C, Edvardsson G, Heggelund A, and Lundborg P (1990) Effect of omeprazole and cimetidine on plasma diazepam levels. Eur. J. Clin. Pharmacol. 39: 51-54. Herman RJ and Wilkinson …
189	Diazoxide	364-98-7	0.21	0.06	0.06	58	48	Oglivie RI, Nadeau JH, and Sitar DS (1982) Diazoxide concentration-response relation in hypertension. Hypertension 4: 167-173. Kirsten R, Nelson K, Kirsten D, and Heintz B (!988) Clinical pharmacokinetics of vasodilators. Part I. Clin. Pharmacokinet. 34: 457-482.
190	Dibekacin	34493-98-6	0.13	0.8	NF	2.7	2.4	Arancibia A, Chavez J, Ibarra R, Ruiz I, Icarte A, Thambo S, and Chavez H (1987) Disposition kinetics of dibekacin in normal subjects and in patients with renal failure. Int. J. Clin. Pharmacol, Ther. Toxicol. 25: 38-43. Goto M, Sugiyama M, and Ishizaki T (1980) Pharmacokinetic studies with dibekacin, a new aminoglycoside, after intravenous and intramuscular administration to human volunteers. An…	Plasma concentrations measured with a bioassay.
191	Dichloroacetic Acid	79-43-6	0.19	5.3	NF	0.6	0.65	Jia M, Coats B, Chadha M, Frentzen B, Perez-Rodriguez J, Chadik PA, Yost RA, Henderson GN, and Stacpoole PW (2006) Human Kinetics of Orally and Intravenously Administered Low-Dose 1,2-13C-Dichloroacetate. J. Clin. Pharmacol. 46: 1449-1459.
192	Diclofenac	15307-86-5	0.22	3.5	0.005	1	1.4	Willis JV, Kendall MJ, Flinn RM, Thornhill DP, and Welling PG (1979) The pharmacokinetics of diclofenac sodium following intravenous and oral administration. Eur. J. Clin. Pharmacol. 16: 405-410. Leucuta SE, Rus V, Bolosiu H, Mocan A, Polinicencu C, and Bojita M (1996) Farmacocinetica diclofenacului sodic administrat in doza unica pe cale intravenosa si orala sub forma de solutie injectabilia exp…	VDss calculated using micro rate constants and exponential fit parameters reported in the references.
193	Dicloxacillin	3116-76-5	0.11	2	0.033	0.92	0.88	Dittert LW, Griffen WO, LaPiana JC, Shainfeld FJ, and Doluisio JT (1969) Pharmacokinetic interpretation of penicillin levels in serum and urine after intravenous administration. Antimic. Agents Chemother. 42-48. Roder BL, Frimodt-Moller, Espersen F, and Rasumussen SN (1995) Dicloxacillin and flucloxacillin: pharmacokinetics, protein binding and serum bacteriocidal titers in healthy subjects after…	VDss calculated using micro rate constants reported in the reference by Dittert, et al. Concentrations determined using a bioassay.
194	Didanosine	69655-05-6	0.77	11	0.95	1.2	1.4	Knupp CA, Shyu WC, Dolin R, Valentine FT, McLaren C, Martin RR, Pittman KA, and Barbhaiya RH (1991) Pharmacokinetics of didanosine in patients with acquired immunodeficiency syndrome or acquired immunodeficiency syndrome-related complex. Clin. Pharmacol. Ther. 49: 523-535. Videx Product Label.
195	Diflunisal	22494-42-4	0.097	0.1	0.0016	14	10	Nuernberg B and Brune K (1989) Buffering the stomach content enhances the absorption of diflunisal in man. Biopharm. Drug Dispos. 10: 377-387. Lin JH (1989) Species differences in protein binding of diflunisal. Drug Metab. Dispos. 17: 221-223.	Parameters calculated from a digitized C vs t plot provided in the report. Note: N=1
196	Digitoxin	71-63-6	0.44	0.043	0.066	170	180	Ochs HR, Grube E, Greenblatt DJ, Arendt R, and Bodem G (1981) Pharmacokinetics and pharmacodynamics of intravenous digoxin and digitoxin. Klin. Wochenschr. 59: 889-897. Kurz H, Mauser-Ganshorn A, and Stickel HH (1977) Differences in the binding of drugs to plasma proteins from newborn and adult man. I. Eur. J. Clin. Pharmacol. 11: 463-467.	VDss calculated using C vs t data obtained from digitization of a plot reported in the reference.
197	Digoxin	20830-75-5	4.1	1.7	0.7	40	38	Cusack B, Kelly J, O'Malley K, Noel J, Lavan J, and Horgan J (1979) Digoxin in the elderly: pharmacokinetic consequences of old age. Clin. Pharmacol. Ther. 25: 772-776. Ohnhaus EE, Spring P, and Dettli L (1972) Protein binding of digoxin in human serum. Eur. J. Clin. Pharmacol. 5: 34-36.	VDss calculated using C vs t data obtained from digitization of a plot reported in the reference.
198	Dihydroquinidine	1435-55-8	2.8	4.2	0.22	11	5.7	Ueda CT, Williamson BJ, and Dzindzio BS (1976) Disposition kinetics of dihydroquinidine following quinidine administration. Res. Comm. Chem. Path. Pharmacol. 14: 215-225. Leroyer R, Varoquaux O, Guillebastres R, Jarreau C, Normand JP, Jaillon P, Advenier C, and Pays M (1986) Study on protein binding of 3-(R)- and 3-(S)-hydroxy derivatives of quinidine and dihydroquinidine. Therapie 41: 159-162.
199	Dilevalol	75659-07-3	4.8	29	NF	2.8	3.3	Neubeck M, Becker C, Henke D, Roesch W, Spahn-Langguth H, and Mutschler E. (1993) Pharmacokinetics of dilevalol and its conjugates in man: assay method for plasma, blood, urine and bile samples and preliminary pharmacokinetic studies. Arz. Forsch. 43: 953-957.
200	Diltiazem	42399-41-7	4.1	13	0.18	5.3	5.6	Hoglund P and Nilsson LG (1988) Physiological disposition of intravenously administered 14C-labeled diltiazem in healthy volunteers. Ther. Drug Monit. 10: 401-409. Kolle EU, Ochs HR, and Vollmer KO (1983) Pharmacokinetic model of diltiazem. Arz. Forsch. 33: 972-977. Kirsten R, Nelson K, Kirsten D, and Heintz B (!988) Clinical pharmacokinetics of vasodilators. Part I. Clin. Pharmacokinet. 34: 457-…	Different values reported for terminal phase half-life in the Hoglund and Nillson vs the Kolle et al reports.
201	Diphenhydramine	58-73-1	6.5	9.8	0.19	11	9.3	Meredith CG, Christian CD, Johnson RF, Madhavan SV, and Schenker S (1984) Diphenhydramine disposition in chronic liver disease. Clin. Pharmacol. Ther. 35: 474-479. Spector R, Choudhury AK, Chiang CK, Goldberg MJ, and Ghoneim MM (1980) Diphenhydramine in Orientals and Caucasians. Clin. Pharmacol. Ther. 28: 229-234.
202	Diprafenone	81447-80-5	1.2	11	0.017	1.9	1.5	Trenk D, Wagner F, Sachs W, and Jaehnchen E (1989) Pharmacokinetic characterization of the antiarrhythmic drug diprafenone in man. Eur. J. Clin. Pharmacol. 37: 313-316.
203	Diprophylline	479-18-5	0.42	4.8	NF	1.5	1.7	Zuidema J and Merkus FWHM (1981) Pharmacokinetics and pharmacodynamics of diprophylline. Pharm. Weekbl. 3: 1320-221.	VDss was calculated using C vs t data obtained by digitization of the plot provided in the reference.
204	Disopyramide	3737-09-5	0.52	0.9	0.16	9.6	7	Lima JJ, Haughey DB, and Leier CV (1984) Disopyramide pharmacokinetics and bioavailability following the simultaneous administration of disopyramide and 14C-disopyramide. J. Pharmacokinet. Biopharm. 12: 289-313.
205	Docetaxel	114977-28-5	2.1	14	0.04	2.5	11	Rosing H, Lustig V, van Warmerdam LJC, Huizing MT, ten Bokkel Huinink WW, Schellens JHM, Rodenhuis S, Bult A, and Beijnen JH (2000) Pharmacokinetics and metabolism of docetaxel administered as a 1-h intravenous infusion. Cancer Chemother. Pharmacol. 45: 213-218. Minami H, Kawada K, Sasaki Y, Igarashi T, Saeki T, Tahara M, Itoh K, and Fujii H (2006) Pharmacokinetics and pharmacodynamics of protein…
206	Dofetilide	115256-11-6	3.3	5.2	0.36	11	8.1	Gemmill JD, Howie CA, Meredith PA, Kelman AW, Rasmussen HS, Hillis WS, and Elliott HL (1991) A dose ranging study of UK-68,798, a novel class III anti-arrhythmic agent, in normal volunteers. Br. J. Clin. Phaemacol. 32: 429-432. Smith DA, Rasmussen HS, Stopher DA, and Walker DK (1992) Pharmacokinetics and metabolism of dofetilide in mouse, rat, dog and man. Xenobiotica 22: 709-719.
207	Dolasetron	115956-12-2	2	180	NF	0.19	0.13	Dimmit DC, Choo YS, Martin LA, Arumugham T, Hahne WF, and Weir SJ (1999) Intravenous pharmacokinetcs and absolute oral bioavailability of dolasetron in healthyl volunteers: part 1. Biopharm. Drug Disp. 20, 29-39.	Pharmacokinetic parameters were calculated from C vs t data obtained by digitization of the plot provided in the reference.
208	Domperidone	57808-66-9	3.4	9.5	0.082	6	7.5	Heykants J, Hendriks R, Meuldermans W, Michiels M, Scheygrond H, and Reyntjens H (1981) On the pharmacokinetics of domperidone in animals and man. IV. The pharmacokinetics of intravenous domperidone and its bioavailability in man following intramuscular, oral and rectal administration. Eur. J. Drug Metab. Pharmacokinet. 6: 61-70.	VD calculated from micro rate constants reported in the paper by Heykants, et al.
209	Doxacurium	133814-18-3	0.22	2.7	0.53	1.4	1.7	Cook DR, Freeman JA, Lai AA, Robertson KA, Kang Y, Stiller RL, Aggarwal S, Abou-Donia MM, and Welch RM (1991) Pharmacokinetics and pharmacodynamics of doxacurium in normal patients and in those with hepatic or renal failure. Anesth. Analg. 72: 145-150. Roy JJ and Varin F (2004) Physicochemical properties of neuromuscular blocking agents and their impact on the pharmacokinetic-pharmacodynamic rela…
210	Doxapram	309-29-5	1.2	5.3	NF	3.7	4.1	Robson RH and Prescott LF (1979) A pharmacokinetic study of doxapram in patients and volunteers. Br. J. Clin. Pharmacol. 7: 81-87.	VDss calculated from digitized from plot reported
211	Doxazosin	74191-85-8	1.3	1.6	0.017	14	10	Meredith PA, Elliott HL, Kelman AW, and Reid JL (1985) Application of pharmacokinetic-pharmacodynamic modelling for the comparison of quinazoline alpha-adrenoreceptor agonists in normotensive volunteers. J. Cardiovasc. Pharmacol. 7: 532-537. Vincent J, Meredith PA, Elliott HL, and Reid JL (1986) The pharmacokinetics of doxazosin in elderly normotensives. Br. J. Clin. Pharmacol. 21: 521-524. Kaye …
212	Doxepin	1668-19-5	12	14	0.2	15	15	Yan JH, Hubbard JW, McKay G, Korchinski ED, Midha KK (2002) Absolute bioavailability and stereoselective pharmacokinetics of doxepin. Xenobiotica 32: 615-623. Virtanen R, Iisalo E, and Irjala K (1982) Protein binding of doxepin and desmethyldoxepin. Acta Pharmacol. Toxicol. 51: 159-164.	Z- and E isomer data were averaged.
213	Doxifluridine	3094-09-5	0.28	11	0.61	0.46	0.35	Schaaf LJ, Dobbs BR, Edwards IR, and Perrier DG (1988) The pharmacokinetics of doxifluridine and 5-fluorouracil after single intravenous infusions of doxifluridine to patients with colorectal cancer. Eur. J. Clin. Pharmacol. 34: 439-443. Meynial D, Lopez A, Malet-Martino MC, Hoffmann JS, and Martino R (1988) Application of fluorine-19 nuclear magnetic resonance to the determination of plasma-prot…	Concentration dependent; fu data cited is for the lowest concentration.
214	Doxorubicin	23214-92-8	22	15	0.28	24	32	Carmaggi CM, Comparsi R, Strocchi E, Testoni F, Angelli B, and Pannuti F (1988) Epirubicin and doxorubicin comparative metabolism and pharmacokinetics. Canc. Chemother. Pharmacol. 21: 221-228. Piscitelli SC, Rodvold KA, Rushing DA, and Tewksbury DA (1993) Pharmacokinetics and pharmacodynamics of doxorubicin in patients with small cell lung cancer. Clin. Pharmacol. Ther. 53: 555-561. Eksborg S, Eh…
215	Doxycycline	564-25-0	0.69	0.46	0.12	25	14	Nguyen VX, Nix DE, Gillikin S, and Schentag JJ (1989) Effect of oral antacid administration on the pharmacokinetics of intravenous doxycycline. Antimic. Agents Chemother. 33: 434-436. Houin G, Brunner F, Nebout T, Cherfaoui M, Lagrue G, and Tillement JP (1983) The effects of chronic renal insufficiency on the pharmacokinetics of doxycycline in man. Br. J. Clin. Pharmacol. 16: 245-252. Raghuram TC…
216	DP-b 99	222315-88-0	1.1	14	NF	1.3	3.5	Rosenberg G, Angel I, and Kozak A (2005) Clinical pharmacology of DP-b99 in healthy volunteers: First administration to humans. Br. J. Clin. Pharmacol. 60: 7-16.
217	Drotaverine	14009-24-6	1.9	3.5	0.12	9	9.3	Bojali OO, Onyeji CO, Ogundani AO, Olugbade TA, and Ogunbona FA (1996) Pharmacokinetics and bioavailability of drotaverine in humans. Eur. J. Drug Metab. Pharmacokinet. 21: 217-221. Vargay Z, Deutsch T, Szatmari I, Szuts T, Varkonyi P, Kerpel-Fronius S, and Eckhardt S (1984) The fate of drtoaverine-acephyllinate in rat and man II. Human pharmacokinetics of drotaverine-14C-acephyllinate. Eur. J. D…	VDss calculated from C vs t data obtained by digitization of the data provided in the reference.
218	Edrophonium	312-48-1	1.1	9.6	NF	1.9	1.8	Morris RB, Cronnelly R, Miller RD, Stanski DR, and Fahey MR (1981) Pharmacokinetics of edrophonium and neostigmine when antagonizing d-tubocurarine neuromuscular blockade in man. Anesthesiol. 54: 399-402.
219	Eletriptan	143322-58-1	1.6	5.3	0.15	5	4.2	Milton AK, Scott NR, Allen MJ, Abel S, Jenkins VC, James GC, Rance DJ, and Eve MD (2002) Pharmacokinetics, pharmacodynamics, and safety of the 5-HT1B/1D agonist eletriptan following intravenous and oral administration. J. Clin. Pharmacol. 42: 528-539. Relpax Product Label.	VDss was calculated from C vs t data obtained by digitization of the plot (0.102 mg/kg dose only) included in the reference.
220	Eltanolone	128-20-1	2	22	0.01	1.5	4.7	Dale O, Hynne H, Parivar K, Johansson E, and Widman M (1999) Pharmacokinetics of etanolone in male and female patients following intravenous bolus injection. Acta Anaesthesiol. Scand. 43: 415-420.
221	Enalaprilat	76420-72-9	0.38	1.6	0.62	4	39	Hockings N, Ajayi AA, and Reid JL (1986) Age and the pharmacokinetics of angiotensin converting enzyme inhibitors enalapril and enalaprilat. Br. J. Clin. Pharmacol. 21: 341-348. Mujais SK, Quintanilla A, Zahid M, Koch K, Shaw W, and Gibson T (1992) Renal handling of enalaprilat. Am. J. Kidney Dis. 19: 121-125.
222	Encainide	66778-36-7	2.2	13	0.26	2.8	2.6	Wensing G, Monig H, Ohnhaus EE, and Hoensch HP (1991) Pharmacokinetics of encainide in patients with cirrhosis. Cardiovasc. Drugs Ther. 5: 733-740. C Funck-Brentano, J Turgeon, RL Woosley, and DM Roden (1989) Effect of low dose quinidine on encainide pharmacokinetics and pharmacodynamics. Influence of genetic polymorphism. Journal of Pharmacology and Experimental Therapeutics 249: 134-42. Jaillon…	EM data only from Funck-Bretano, et al. and Wensing et al. reports.
223	Endralazine	39715-02-1	2.2	13	NF	2.7	5.6	Reece PA, Cozamanis I, and Zacest R (1983) Endralazine - a new hydralazine-like antihypertensive with high systemic bioavailability. Eur. J. Clin. Pharmacol. 25: 553-556.
224	Eniporide	176644-21-6	1.1	8.2	NF	2.3	2.2	Kovar A, Peters T, Beier N, and Derendorf H (2001) Pharmacokinetic/pharmacodynamic evaluation of the NHE inhibitor Eniporide. J. Clin. Pharmacol. 41: 139-148.
225	Enoxacin	74011-58-8	2	5.4	0.8	6.2	5.1	Nix DE, Lebsack ME, Chapelsky M, Sedman AJ, Busch J, and Norman A (1993) Effect of oral antacids on disposition of intravenous enoxacin. Antimic. Agents Chemother. 37: 775-777. Wise R, Lister D, McNulty CAM, Griggs D, and Andrews JM (1986) The comparative pharmacokinetics and tissue penetration of four quinolones including intravenously administered enoxacin. Infection 14: S196-S202. Bergogne-Ber…
226	Enprofylline	41078-02-8	0.63	4	0.55	2.6	1.8	Lunell E, Borga O, and Alarsson R (1984) Pharmacokinetics of enprofylline in patients with impaired renal function after a single intravenous dose. Eur. J. Clin. Pharmacol. 26: 87-93. Kraan J, Borgstrom L, Koeter GH, Laseur M, Jonkman JHG, and deNoord OE (1988) Creation of four consecutive intantaneous steady-state plasma concentration plateaus of theophylline and enprofylline by repeated infusio…
227	Entacapone	130929-57-6	0.27	12	0.02	0.38	2.4	Heikkinen H, Saraheimo M, Antila S, Ottoila P, and Pentikainen PJ (2001) Pharmacokinetics of entacapone, a peripherally acting catechol-O-methyltransferase inhibitor, in man. A study using a stable isotope technique. Eur. J. Clin. Pharmacol. 56: 821-826. Najib J (2001) Entacapone: a catechol-O-methyltransferase inhibitor for the adjunctive treatment of parkinson's disease. Clin. Ther. 23: 802-832.
228	Epirubicin	56420-45-2	45	20	0.25	38	36	Carmaggi CM, Comparsi R, Strocchi E, Testoni F, Angelli B, and Pannuti F (1988) Epirubicin and doxorubicin comparative metabolism and pharmacokinetics. Canc. Chemother. Pharmacol. 21: 221-228. Carmaggi CM, Strocchi E, Martoni A, Angelelli B, Comparsi R, anmd Pannuti F (1985) Epirubicin plasma and blood pharmacokinetics after single i.v. bolus in advanced cancer patients. Drugs Exptl. Clin. Res. 1…
229	Epristeride	119169-78-7	0.54	0.33	0.03	27	27	Benincosa LJ, Audet PR, Lundberg D, Zariffa N, and Jorkasky DK (1996) Pharmacokinetics and absolute bioavailability of epristeride in healthy male subjects. Biopharm, Drug Dispos. 17: 249-258. Li JT, Zheng Z, and Jin J (2000) Pharmacokinetics of epristeride in healthy male volunteers. Zhongguo Linchuang Yaolixue Zazhi 16: 424-428.
230	Eprosartan	133040-01-4	0.17	1.9	0.017	1.5	2.1	Tenero D, Martin D, Ilson B, Jushchyshyn J, Boike S, Lundberg D, Zariffa N, Boyle D, Jorkasky D (1998) Pharmacokinetics of intravenously and orally administered eprosartan in healthy males: absolute bioavailability and effect of food. Biopharm. Drug Dispos. 19: 351-356. Kovacs SJ, Tenero DM, Martin DE, Ilson BE, and Jorkasky DK (1999) Pharmacokinetics and protein binding of eprosartan in hemodial…
231	Eptifibatide	188627-80-7	0.17	1.2	0.75	2.4	4.2	Gretler D, Guerciolini R, and Williams PJ (2004) Pharmacokinetic and pharmacodynamic properties of eptifibatide in subjects with normal or impaired renal function. Clin. Ther. 26: 390-398. Integrilin Product Label.
232	Ergotamine	113-15-5	3.6	15	0.02	4	2.1	Ibraheem JJ, Paalzow L, and Tfelt-Hansen P (1985) Linear pharmacokinetics of intravenous ergotamine tartrate. Eur. J. Clin. Pharmacol. 29: 61-66.	VDss calculated from compartmental parameters provided in the reference.
233	Eritoran	185955-34-4	0.048	0.013	NF	62	51	Wong YN, Rossignol D, Rose JR, Kao R, Carter A, and Lynn M (2003) Safety, pharmacokinetics, and pharmacodynamics of E5564, a lipid A antagonist, during an ascending single-dose clinical study. J. Clin. Pharmacol. 43: 735-742. Rossignol DP, Wasan KM, Choo E Yau E, Wong N, Rose J, Moran J, and Lynn M (2003) Safety, pharmacokinetics, pharmacodynamics, and plasma lipoprotein distribution of eritoran …	Protein binding driven by lipoproteins--not reported directly
234	Ertapenem	153832-46-3	0.12	0.45	0.1	4.4	3.8	Majumdar AK, Musson DG, Birk KL, Kitchen CJ, Holland S, McCrea J, Mistry G, Hesney M, Xi L, Li SX, Haesen R, Blum RA, Lins RL, Greenberg H, Waldman S, Deutsch P, and Rogers JD (2002) Pharmacokinetics of ertapenem in healthy young volunteers. Antimic. Agents Chemother. 46: 3506-3511.	Protein binding non-linear over the concentration range studied in vivo; median value used.
235	Erythromycin	114-07-8	0.95	5.6	0.1	2.8	2	Welling PG and Craig WA (1978) Pharmacokinetics of intravenous erythromycin. J. Pharm. Sci. 67: 1057-1059.	Plasma concentrations determined using a bioassay.
236	Esmolol	81147-92-4	1.2	290	0.59	0.07	0.15	Sum CY, Yacobi A, Kartzinel R, Stampfli H, Davis CS, and Lai CM (1983) Kinetics of esmolol, an ultra-short-acting beta blocker, and of its major metabolite. Clin. Pharmacol. Ther. 34: 427-434. Okamura M, Kumagai M, Murasaki Y, Ohkura T, Miyamoto Y, Kawai Y, Tamura T, Takariki Y, and Tomisawa H (2001) Stereoselective pharmacokinetics of esmolol enantiomers. Yakubutsu Dotai 16: 427-435.
237	Estradiol	50-28-2	1.2	30	0.016	0.7	1.7	Kuhnz W, Gansau C, and Mahler M (1993) Pharmacokinetics of estradiol, free and total estrone, in young women following single intravenous and oral administration of 17beta estradiol. Arz. Forsch. 43: 966-973. Bruning PF and Bonfrer JMG (1986) Free fatty acid concentrations correlated with the available fraction of estradiol in human plasma. Cancer Res. 46: 2606-2609.
238	Estramustine phosphate	4891-15-0	0.12	0.94	NF	2.1	2.4	Hudes G, Haas N, Yeslow G, Gillon T, Gunnarsson PO, Ellman M, Nordle O, Eriksson B, Miller L, Cisar L, Kopreski M, Viaro D, and Hartley-Asp B (2002) Phase I clinical and pharmacologic trial of intravenous estramustine phosphate. J. Clin. Oncol. 20: 1115-1127. Gunnarsson PO, Andersson SB, Johansson SA, Nilsson T, and Plym-Forshell G (1984) Pharmacokinetics of estramustine phosphate (Estracyt) in p…	Compartmental model parameters from Gunnarsson, et al. were used in the calculation of VDss.
239	Ethacrynic Acid	58-54-8	0.26	8.72857	NF	0.5	0.5	Lacreta FP, Brennan JM, Nash SL, Comis RL, Tew KD, and O'Dwyer P (1994) Pharmacokinetics and bioavailability study of ethacrynic acid as a modulator of drug resistance in patients with cancer. J. Pharmacol. Exp. Ther. 270: 1186-1191.
240	Ethambutol	74-55-5	1.7	10	0.18	2.7	3.1	Lee CS Brater DC, Gambertoglio JG, and Benet LZ (1980) Disposition kinetics of ethambutol in man. J. Pharmacokinet. Biopharm. 8: 335-346. Holdiness MR (1984) Clinical pharmacokinetics of the antituberculosis drugs. Clin. Pharmacokinet. 9: 511-544.
241	Ethinylestradiol	57-63-6	4.3	7	0.014	11	9.7	Kuhnz W, Humpel M, Biere H, and Gross D (1996) Influence of repeated oral doses of ethinyloestradiol on the metabolic disposition of [13C2]-ethinyloestradiol in young women. Eur. J. Clin. Pharmacol. 50: 231-235. Kuhnz W, Pfeffer M, and Al-Yacoub G (1990) Protein binding of the contraceptive steroids gestodene, 3-keto-desogestrel and ethinylestradiol in human serum. J. Ster. Biochem. 35: 313-318. …
242	Ethinylestradiol-17-Sulfate	75803-36-0	0.61	1.3	NF	7.8	9.3	Goldzieber JW, Mileikowsky G, Newburger J, Dorantes A, and Stavchansky SA (1988) Human pharmacokinetics of ethinyl estradiol 3-sulfate and 17-sulfate. Steroids 51: 63-79.	VDss calculated from reported micro-constants.
243	Ethinylestradiol-3-Sulfate	24560-70-1	2.3	4.7	0.011	8.2	8.4	Goldzieber JW, Mileikowsky G, Newburger J, Dorantes A, and Stavchansky SA (1988) Human pharmacokinetics of ethinyl estradiol 3-sulfate and 17-sulfate. Steroids 51: 63-79. Reed MJ and Fotherby K (1980) Interaction of ethinyloestradiol sulphate with plasma proteins. J. Steroid Biochem. 13: 495-497.	VDss calculated from reported micro-constants.
244	Etilefrine	709-55-7	2.1	14	0.77	2.5	2.2	Hengstmann JH, Weyand U, and Dengler HJ (1975) The physiological disposition of etilefrine in man. Eur. J. Clin. Pharmacol. 9: 179-187.	VDss calculated from reported micro-constants.
245	Etomidate	33125-97-2	2.7	13	0.23	2.9	3.5	Van hamme MJ, Ghoneim MM, and Ambre JJ (1978) Pharmacokinetics of etomidate, a new intravenous anesthetic. Anesthesiology 49: 274-277. de Ruiter G, Popescu DT, deBoer AG, Smeekens JB, Breimer DD (1981) Pharmacokinetics of etomidate in surgical patients. Arch. Int. Pharmacodynam. Ther. 249: 180-188. Meuldermans WEG and Heykants JJP (1976) The plasma protein binding and distribution of etomidate in…	Microconstant values from Van Hamme, et al., were used to estimate VDss. Data were combined with deRuyter et al.
246	Etoposide	33419-42-0	0.18	0.5	0.12	6	5.7	Pfluger KH, Schmidt L, Merkel M, Jungelas H, and Havemann K (1987) Drug monitoring of etoposide (VP16-213). Canc. Chemother. Pharmacol. 20: 59-66. Kaul S, Igwemezie LN, Stewart DJ, Fields SZ, Kosty M, Levithan N, Bukowski R, Gandara D, Goss G, et al. (1995) Pharmacokinetics and bioequivalence of etoposide following intravenous administration of etoposide phosphate and etoposide in patients with s…
247	Etoricoxib	202409-33-4	1.5	0.79	0.081	32	26	Rodrigues AD, Halpin RA, Geer LA, Cui D, Woolf EJ, Matthews CZ, Gottesdiener KM, Larson PJ, Lasseter KC, and Agrawal NGB (2003) Absorption, metabolism, and excretion of etoricoxib, a potent and selective cyclooxygenase-2 inhibitor, in healthy male volunteers. Drug Metab. Dispos. 31: 224-232. Agrawal NGB, Rose MJ, Matthews CZ, Woolf EJ, Porras AG, Geer LA, Larson PJ, Cote J, Dilzer SC, Lasseter KC…
248	Exatecan (acid)	276680-63-8	0.44	0.96	NF	7.6	6.7	Royce ME, Rowinsky EK, Hoff PM, Coyle J, DeJager R, Pazdur R, and Saltz LB (2004) A phase II study of intravenous exatecan mesylate (DX-8951f) administered daily for five days every three weeks to patiets with metastatic adenocarcinoma of the colon or rectum. Invest. New Drugs 22: 53-61.	PK data are for ring-opened acid form
249	Famotidine	76824-35-6	1.2	6.6	0.84	3	2.8	Yeh KC, Chremos AN, Lin JH, Constanzer ML, Kanovsky SM, Hucker HB, Antonello J, Vlasses P, Ryan JR, and Williams RL (1987) Single-dose pharmacokinetics and bioavailability of famotidine in man. Results of multicenter collaborative studies. Biopharm. Drug Dispos. 8: 549-560.	VDss calculated from C vs t data obtained by digitization of the plots provided in the reference.
250	Felodipine	72509-76-3	4.4	11	0.0036	6.7	10	Edgar B, Regardh CG, Johnsson G, Johansson L, Lundborg P, Lofberg I, and Ronn O (1985) Felodipine kinetics in healthy men. Clin. Pharmacol. Ther. 38: 305-211.	VDss calculated from compartmental parameters provided in the reference by Edgar, et al., 1985.
251	Fenoterol	13392-18-2	1.2	29	0.53	0.69	0.87	Warnke K, Hildebrandt R, Gunther K, Langen U, and Gundert-Remy U (1992) The pharmacokinetics of the beta2-adrenoreceptor agonist fenoterol in healthy women. Eur. J. Clin. Pharmacol. 43: 663-665. Heel RC, Brigden RN, Speight TM, and Avery GS (1978) Fenoterol: a review of its pharmacological properties and therapeutic efficacy in asthma. Drugs 15: 3-32.	Study subjects all women, so a body weight of 55 kg was assumed.
252	Fenoximone	77671-31-9	1.8	29	0.3	1	1	Alken RG, Belz GG, Haegele KD, Meinicke T, and Schechter PJ (1984) Kinetics of fenoximone, a new cardiotonic, in healthy subjects. Clin. Pharmacol. Ther. 36: 209-216. Hook RH, Boxenbaum H, Thompson GA, and Okerholm RA (1988) Human serum and plasma protein binding of enoximone and its sulfoxide metabolite. J. Pharm. Sci. 77: 1012-1017.
253	Fenspiride	5053-06-5	3	2.6	NF	19	14	Montes B, Catalan M, Roces A, Jeanniot JP, and Honorato JM (1993) Single-dose pharmacokinetics of fenspiride hydrochloride: phase I clinical trial. Eur. J. Clin. Pharmacol. 45: 169-172.	VDss calculated from C vs t data included in the reference.
254	Fentanyl	437-38-7	0.89	4.7	0.16	3.2	3	Fung DL and Eisele JH (1980) Fentanyl pharmacokinetics in awake volunteers. J. Clin. Pharmacol. 20: 652-658. Schleimer R, Benjamani E, Eisele J, and Henderson G (1977) Pharmacokinetics of fentanyl as determined by radioimmunoassay. Clin. Pharmacol. Ther. 23: 188-194. Meuldermans WEG, Hurkmans RMA, and Heykants JJP (1982) Plasma protein binding and distribution of fentanyl, sufentanil, alfentanil …
255	Finasteride	98319-26-7	1.1	2.4	0.095	7.6	6	Steiner JF (1996) Clinical pharmacokinetics and pharmacodynamics of finasteride. Clin. Pharmacokinet. 30: 16-27. Carlin JR, Hoglund P, Eriksson LO, Christofalo P, Gregoire SL, Taylor AM, and Andersson KE (1992) Disposition and pharmacokinetics of [14C]finasteride after oral administration in humans. Drug Metab. Dispos. 20: 148-155
256	Flavopiridol	146426-40-6	1.5	6.1	0.06	4	5.2	Zhai S Sausville EA, Senderowicz AM, Ando Y, Headlee D, Messmann RA, Arbuck S, Murgo AJ, Melillo G, Fuse E, and Figg WD (2003) Clinical pharmacology and pharmacogenetics of flavopiridol 1-h i.v. infusion in patients with refractory neoplasms. Anti-Cancer Drugs. 14: 125-135. Rudek MA, Bauer KS, Lush RM, Stinson SF, Senderowicz AM, Headlee DJ, Arbuck SG, Cox MC, Murgo AJ, Sausville EA, and Figg WD …
257	Flecainide	54143-55-4	6.1	4.9	0.52	21	12	Wang T, Siddoway LA, Thompson KA, Conard GJ, Bergstrand RH, Kvam D, Roden DM, and Woosley RL (1988) The development and testing of intravenous dosing regimens: application to flecainide for teh suppression of ventricular arrhythmias. Clin. Pharmacol. Ther. 43: 499-508. Tjandra-Maga TB, Verbesselt R, Van Hecken A, Mullie A, and DeSchepper PJ (1986) Flecainide: single and multiple oral dose kinetic…	VDss from the reference by Wang, et al, was calculated using the compartmental parameters reported in the reference.
258	Fleroxacin	79660-72-3	1.6	2.4	0.73	11	8.6	Weidekamm E, Portmann R, Suter K, Partos C, Dell D, and Lucker PW (1987) Single- and multiple-dose pharmacokinetics of fleroxacin, a trifluorinated quinolone, in humans. Antimic. Ag. Chemother. 31: 1909-1914. Bergogne-Berezin E (2002) Clinical role of protein binding of quinolones. Clin. Pharmacokinet. 41: 741-750.
259	Flucloxacillin	5250-39-5	0.19	2.4	0.043	1.3	1.4	Adam D, Koeppe P, and Heilmann (1983) Pharmacokinetics of amoxicillin and flucloxacillin following the simultaneous intravenous administration of 4 g and 1 g respectively. Infection 11: 150-154. Bergan T, Engeset A, Olszewski W, Oestby N, and Solberg R (1986) Extravascular penetration of highly protein-bound flucloxacillin. Antimic. Agents Chemother. 30: 729-732. Roder BL, Frimodt-Moller, Esperse…
260	Fluconazole	86386-73-4	0.75	0.31	0.89	40	30	Foulds G, Wajszczuk C, Weidler DJ, Garg DJ, and Gibson P (1988) Steady state parenteral kinetics of fluconazole in man. Ann. N.Y. Acad. Sci. 544: 427-30. Humphrey MJ, Jevons S, and Tarbit MH (1985) Pharmacokinetic evaluation of UK-49,858, a metabolically stable triazole antifungal drug, in animals and humans. Animic. Agents Chemother. 28: 648-653.
261	Flucytosine	2022-85-7	0.68	2	1	5.7	4.2	Cutler RE, Blair AD, and Kelly MR (1978) Flucytosine kinetics in subjects with normal and impaired renal function. Clin. Pharmacol. Ther. 24; 333-342. Lee KJ, Mower R, Hollenbeck T, Castelo J, Johnson N, Gordon P, Sinko PJ, Holme K, and Lee YH (2003) Modulation of nonspecific binding in ultrafiltration protein binding studies. Pharm. Res. 20: 1015-1021.
262	Fludarabine	21679-14-1	2.2	3.2	0.76	12	11	Kuo GM, Boumpas DT, Illei GG, Yarboro C, Pucino F, and Burstein AH (2001) Fludarabine pharmacokinetics after subcutaneous and intravenous administration in patients with lupus nephritis. Pharmacother. 21: 528-533. Knebel W, David JC, Sanders WD, Fessler B, Yarboro C, Pucino F, and Boumpas DT (1998) The pharmacokinetics and pharmacodynamics of fludarabine in rheumatoid arthritis. Pharmacotherapy 1…	Data from Kuo, et al were digitized prior to calculation of VDss. Micro rate constants from Knebel were used to calculated VDss.
263	Flumazenil	78755-81-4	0.8	16	0.58	1	0.78	Janssen U, Walker S, Maier K, von Gaisberg U, and Klotz U (1989) Flumazenil disposition and elimination in cirrhosis. Clin. Pharmacol. Ther. 46: 317-323. Pomier-Layrargues G, Giguere JF, Lavoie J, Willems B, and Butterworth RF (1989) Pharmacokinetics of benzodiazepine antagonist RO 15-1788 in cirrhotic patients with moderate or severe liver dysfunction. Hepatology 10: 969-972. Klotz U, Ziegler G,…
264	Flunitrazepam	1622-62-4	1.9	1.4	0.17	23	25	Kangas L, Kanto J, and Pakkanen A (1982) A pharmacokinetic and pharmacodynamic study of flunitrazepam. Int. J. Clin. Pharmacol. Ther. Toxicol. 20: 585-588. Lucek RW and Coutinho CB (!976) The role of substituents in the hydrophobic binding of the 1,4-benzodiazepines by human plasma proteins. Molec. Pharmacol. 12: 612-619.	VDss calculated from C vs t data obtained by digitization of the plot included in the reference.
265	Fluorescein	2321-07-5	0.14	1.3	0.11	1.8	1.6	Larsen M, Loft S, Hommel E, and Lund-Andersen H (1988) Fluorescein and fluorescein glucuronide in plasma after intravenous injection of fluorescein. Acta Opthamol. 66: 427-432.	Pharmacokinetic parameters were calculated from C vs t data obtained by digitization of the plot provided in the reference.
266	Fluorouracil, 5-	51-21-8	0.23	26	0.64	0.15	0.12	Port RE, Daniel B, Ding RW, and Herrmann R (1991) Relative importance of dose, body surface area, sex, and age for 5-flurouracil clearance. Oncology 48: 277-281. Schaaf LJ, Dobbs BR, Edwards IR, and Perrier DG (1987) Nonlinear pharmacokinetic characteristics of 5-fluorouracil (5-FU) in colorectal cancer patients. Eur. J. Clin. Pharmacol. 32: 411-418. Esposito M, Rosso R, and Santi L (1974) Plasma…	5-FU shows dose dependent kinetics; low dose data cited.
267	Flupirtine	56995-20-1	1.1	1.6	0.15	11	8.5	Hlavica VP and Niebch G (1985) Untersuchungen zur pharmakokinetik und biotransformation des analgetikums flupirtin beim menschen. Arz. Forsch. 35: 67-74.	VDss calculated from C vs t data obtained by digitization of the plots in the reference.
268	Fluticasone propionate	80474-14-2	3.6	17	0.1	3.9	6	Brutsche MH, Brutsche IC, Munavvar M, Langley SJ, Masterson CM, Daley-Yates PT, Brown R, Custovic A., and Woodcock A (2000) Comparison of pharmacokinetics and systemic effects of inhaled fluticasone propionate in patients with asthma and healthy volunteers: a randomised crossover study. Lancet 356: 556-561. Mackie AE, Ventresca GP, Fuller RW, and Bye A (1996) Pharmacokinetics of intravenous fluti…
269	Fluvastatin	93957-54-1	0.42	16	0.0079	0.44	0.7	Tse F L; Jaffe J M; Troendle A Pharmacokinetics of fluvastatin after single and multiple doses in normal volunteers. Journal of clinical pharmacology (1992), 32(7), 630-8. Tse FLS, Nickerson DF, and Yardley WS (1993) Binding of fluvastatin to blood cells and plasma proteins. J. Pharm. Sci. 82: 942-947.
270	Folinic acid	58-05-9	0.25	5.8	0.087	0.8	1.3	Greiner PO, Zittoun J, Marquet J, and Cheron JM (1989) Pharmacokinetics of (-)-folinic acid after oral and intravenous administration of the racemate. Br. J. Clin. Pharmacol. 28: 289-295. Christophidis N, Louis WJ, Lucas I, Moon W, and Vajda FJ (1981) Renal clearance of methotrexate in man during high-dose oral and intravenous infusion therapy. Cancer Chemother Pharmacol. 6: 59-64.	Data from (-) enantiomer used.
271	Foscarnet	4428-95-9	0.5	2.1	0.85	4	4.7	Aweeka FT, Gambertoglio JG, Kramer F, van der Horst C, Polsky B, Jayewardene A, Lizak P, Emrick L, Tong W, and Jacobson MA (1995) Foscarnet and ganciclovir pharmacokinetics during concomitant or alternating maintenance therapy for AIDS-related cytomegalovirus retinitis. Clin. Pharmacol. Ther. 57: 403-412. Sjovall J, Bergdahl S, Movin G, Ogenstad S, and Saarimaki M (1989) Pharmacokinetics of fosca…	Long terminal phase t1/2 of 88 h reported in Sjovall with a 3-compartment model.
272	Fosfluconazole	194798-83-9	0.15	1.3	0.042	2	2.1	Sobue S, Tan K, Layton G, Leclerc V, and Weil A (2004) The effects of renal impairment on the pharmacokinetics and safety of fosfluconazole and fluconazole following a single intravenous bolus injection of fosfluconazole. Br. J. Clin. Pharmacol. 57: 773-784.
273	Fosfomycin	23155-02-4	0.32	2	1	2.7	1.9	Goto M, Sugiyama M, Nakajima S, and Yamashina H (1981) Fosfomycin kinetics after intravenous and oral administration to human volunteers. Antimic. Agents Chemother. 20: 393-397. Potel G, Meignier M, Baron D, Reynaud A, Touze MD, and Cortieu AL (1989) Pharmacokinetics of fosfomycin in normal and burn patients. Effect of probenecid. Drugs Exptl. Clin. Res. 15: 177-184. Kestle DG and Kirby WMM (1970…
274	Fosinoprilat	95399-71-6	0.13	0.32	0.006	6.8	9.4	Kostis JB, Garland WT, Delaney C, Norton J, and Liao WC (1995) Fosinopril: pharmacokinetics and pharmacodynamics in congestive heart failure. Clin. Pharmacol. Ther. 58: 660-665
275	Fostriecin	87810-56-8	0.086	1.2	NF	1.2	1.5	de Jong RS, Mulder NH, Uges DRA, Sleijfer DT, Hoppener FJP, Groen HJM, Willemse PHB, van der Graaf WTA, and de Vries EGE (1999) Phase I and pharmacokinetic study of the topoisomerase II catalytic inhibitor fostriecin. Br. J. Cancer 79: 882-887.
276	Frovatriptan	158747-02-5	3.6	2.5	0.85	22	24	Buchan P, Keywood C, Wade A, and Ward C (2002) Clinical pharmacokinetics of frovatriptan. Headache 42(Suppl 2): s54-s62.
277	Furosemide	54-31-9	0.12	1.6	0.012	1.3	2.5	Smith DE, Lin ET, and Benet LZ (1980) Absorption and disposition of furosemide in healthy volunteers, measured with a metabolite-specific assay. Drug Metab. Dispos. 8: 337-342. Hammerlund MM, Paalzow LK, and Odlind B (1984) Pharmacokinetics of furosemide in man after intravenous and oral administration. Application of moment analysis. Eur. J. Clin. Pharmacol. 26: 197-207
278	Gabapentin	60142-96-3	0.71	1.7	0.97	7	5.3	Vollmer KO, Anhut H, Thomann P, Wagner F, and Jahnchen D (1989) Pharmacokinetic model and absolute bioavailability of the new anticonvulsant gabapentin. Adv. Epileptol. 17: 209-211. Neurontin Product Label.
279	Gadoversetamide	131069-91-5	0.16	1.2	1	2.2	1.7	OptiMARK Product Label.
280	Galanthamine	357-70-0	2.3	5.6	0.83	6.8	5.3	Westra P, van Thiel MJS, Vermeer GA, Soeterbroek AM, Scaf AH, and Claessens HA (1986) Pharmacokinetics of galanthamine (a long-acting anticholinesterase drug) in anaesthetized patients. Br. J. Anaesth. 58: 1303-1307. Bickel U, Thomsen T, Weber W, Fischer JP, Bachus R, Nitz M, and Kewitz H (1991) Pharmacokinetics of galanthamine in humans and corresponding cholinesterase inhibition. Clin. Pharmaco…
281	Ganciclovir	82410-32-0	1	4.6	0.99	3.7	3.7	Anderson RD, Griffy KG, Jung D, Dorr A, Hulse JD, and Smith RB (1995) Ganciclovir absolute bioavailability and steady-state pharmacokinetics after oral administration of two 3000 mg/d dosing regimens in human immunodeficiency virus and cytomegalovirus seropositive patients. Clin. Ther. 17: 425-432. Aweeka FT, Gambertoglio JG, Kramer F, van der Horst C, Polsky B, Jayewardene A, Lizak P, Emrick L, …
282	Gatifloxacin	112811-59-3	1.7	2.8	0.8	11	10	Gajjar DA, LaCreta FP, Uderman HD, Kollia GD, Duncan G, Birkhofer MJ, and Grasela DM (2000) A dose-escalation study of the safety, tolerability, and pharmacokinetics of intravenous gatifloxacin in healthy adult men. Pharmacotherapy 20: 49S-58S. Perry C, Balfour J, and Lamb H (1999) Gatifloxacin. Drugs 58: 683-698.
283	Gefitinib	184475-35-2	23	12	0.089	32	34	Swaisland, HC, Smith RP, Laight A, Kerr DJ, Ranson M, Wilder-Smith CH, and Duvauchelle T (2005) Single-dose clinical pharmacokinetics studies of gefitinib. Clin. Pharmacokinet. 44: 1165-1177. McKillop D, Hutchison M, Partridge EA, Bushby N, Cooper CMF, Clarkson-Jones JA, Herron W, and Swaisland HC (2004) Metabolic disposition of gefitinib, an epidermal growth factor receptor tyrosine kinase inhib…
284	Gemcitabine	95058-81-4	1.5	32	1	0.81	1	Paitnik A, Eckhardt SG, Izbicka E, Tolcher AA, Hammond LA, Takimoto CH, Schwartz G, McCreery H, Goetz A, Mori M, terada K, Gentner L, Rybak ME, Richards H, Zhang S, and Rowinsky EK (2003) A phase I pharmacokinetic, and biological study of the farnesyltransferase inhibitor tipifarnib in combination with gemcitabine in patients with advanced malignancies. Clin. Canc. Res. 9: 4761-4771. Gemzar Produ…	Parameters calculated from data obtained by digitization of the plot provided in the reference.
285	Genaconazole	120924-80-3	0.62	0.19	NF	54	49	Mojavrian P, Radwanski E, Affirme MB, Cayen MN, and Lin CC (1994) Pharmacokinetics of the triazole antifungal agent geneconazole in healthy men after oral and intravenous administration. Antimic. Agents Chemother. 38: 2758-2762.	VDss calculated from digitized plots.
286	Gentamicin	1403-66-3	0.33	1	1	5.5	4.7	Bertino JS, Booker LA, Franck P, and Rybicki B (1991) Gentamicin pharmacokinetics in patients with malignancies. Antimic. Agents Chemother. 35: 1501-1503. Gordon RC, Regamey C, and Kirby WMM (1972) Serum protein binding of the aminoglycoside antibiotics. Antimic. Agents Chemother. 2: 214-216.
287	Gestodene	60282-87-3	0.46	0.8	0.023	9.6	10	Tauber U, Tack JW, and Matthes H (1989) Single dose phakmacokinetics of gestodene in women after intravenous and oral administration. Contraception 40: 461-476. Kuhnz W, Pfeffer M,and Al-Yacoub G (1990) Protein binding of the contraceptive steroids gestodene, 3-keto-desogestrel and ethinylestradiol in human serum. J. Steroid Biochem. 35: 313-318. Gui LQ and Humpel M (1990) Serum protein binding c…	VDss deteremined from Cvs t data obtained by digitization of plots in Tauber, 1989. Protein binding very different in two reports: 0.006 in Kuhnz et al vs 0.04 in Gui and Humpel; value entered is the average.
288	Ginkgolide A	15291-75-5	0.62	2.3	NF	4.6	3.8	Fourtillian JB, Brisson AM, Girault J, Ingrand I, Decourt JP, Drieu K, Jouenne P, and Biber A (1995) Proprietes pharmaccinetiques du bilobalide et des ginkgolides A et B chez le sujet sain apres administrations intraveineuses et orales d'extrait de Ginkgo biolba (EGb 761). Therapie 50: 137-144.
289	Ginkgolide B	15291-77-7	0.91	2.3	NF	6.6	5.2	Fourtillian JB, Brisson AM, Girault J, Ingrand I, Decourt JP, Drieu K, Jouenne P, and Biber A (1995) Proprietes pharmaccinetiques du bilobalide et des ginkgolides A et B chez le sujet sain apres administrations intraveineuses et orales d'extrait de Ginkgo biolba (EGb 761). Therapie 50: 137-144.
290	Glimepiride	93479-97-1	0.19	0.5	0.005	6.3	9.95	Badian M, Korn A, Lehr KH, Malerczyk V, and Waldhaust W (1994) Absolute bioavailability of glimepiride (Amaryl) after oral administration. Drug Metab. Drug Inter. 11: 331-339. Amaryl Product Label.	Parameters calculated from C vs t data digitized from a plot provided in the reference. Data reported in the table in the reference did not correspond to data obtained from the plot.
291	Glipizide	29094-61-9	0.16	0.56	0.02	4.8	3.3	Pentikainen PJ, Neuvonen PJ, and Penttila A (1983) Pharmacokinetics and pharmacodynamics of glipizide in health volunteers. Int. J. Clin. Pharmacol. Ther. Toxicol. 21: 98-107. Fuccella LM, Tamassia V, and Valzelli G (1973) Metabolism and kinetics of the hypoglycemic agent glipizide in man--comparison with glibenclamide. J. Clin. Pharmacol. New Drugs 13: 68-75.
292	Glyburide	10238-21-8	0.08	0.82	0.021	1.6	2.2	Jonsson A, Chan JCN, Rydberg T, Vaaler S, Hallengren B, Cockram CS, Critchley JAJH, and Melander A (2000) Pharmacodynamics and pharmacokinetics of intravenous glibenclamide in Caucasian and Chinese patients with type-2 diabetes. Eur. J. Clin. Pharmacol. 55: 721-727. Spraul M, Streeck A, Nieradzik M, and Berger M (1989) Uniform elimination pattern for glibenclamide in healthy caucasian males. Arz.…
293	Granisetron	109889-09-0	3.7	9.1	0.35	6.7	5.2	Allen A, Asgill CC, Pierce DM, Upward J, and Zussman BD (1994) Pharmacokinetics and tolerability of ascending intravenous doses of granisetron, a novel 5-HT3 antagonist, in healthy human subjects. Eur. J. Clin. Pharmacol. 46: 159-162. Kytril Product Label.	VDss calculated from CL and MRT provided in Allen, et al., 1994.
294	Guanfacine	29110-47-2	5.6	4.5	0.28	22	15	Carchman SH, Crowe JT, and Wright GJ (1987) The bioavailability and pharmacokinetics of guanfacine after oral and intravenous administration to healthy volunteers. J. Clin. Pharmacol. 27: 762-767.	CL and VDss were calculated from C vs t data obtained by digitization of the plot provided in the reference.
295	Haloperidol	52-86-8	17	7.8	0.08	36	35	Holley FO, Magliozzi JR, Stanski DR, Lombrozo L, and Hollister LE (1983) Haloperidol kinetics after oral and intravenous administration. Clin. Pharmacol. Ther. 33: 477-484. Chang WH, Lam YWF, Jann MW, and Chen H (1992) Pharmacokinetics of haloperidol and reduced haloperidol in Chinese schizophrenic patients after intravenous and oral administration of haloperidol. Psychopharmacology 106: 517-522.…
296	Hexobarbital	56-29-1	1.1	3.4	0.53	5.4	4.9	Breimer DD, Honhoff C, Zilly W, Richter E, and van Rossum JM (1975) Pharmacokinetics of hexabarbital in man after intravenous infusion. J. Pharmacokinet. Biopharm. 3: 1-11. Zilly W, Breimer DD, and Richter E (1975) Induction of drug metabolism in man after rifampicin treatment measured by increased hexobarbital and tolbutamide clearance. Eur. J. Clin. Pharmacol. 9: 219-227. Zilly W, Breimer DD, a…
297	Hydralazine	86-54-4	1.5	85	0.12	0.29	0.96	Ludden TM, Shepherd AMM, McNay JL, and Lin MS (1983) Effect of intravenous dose on hydralazine kinetics after administration. Clin. Pharmacol. Ther. 34: 148-152. Kirsten R, Nelson K, Kirsten D, and Heintz B (1998) Clinical pharmacokinetics of vasodilators. Part I. Clin. Pharmacokinet. 34: 457-482.	From Ludden, et al., used 1.02 umol/kg dose group. Blood values corrected to plasma using B/P=1.68.
298	Hydrocortisone	50-23-7	0.38	5.7	0.2	1.9	1.6	Derendorf H, Moellmann H, Barth J, Mollman C, Tunn S, and Krieg M (1991) Pharmacokinetics and oral bioavailability of hydrocortisone. J. Clin. Pharmacol. 31: 473-476. Toothaker RD and Welling PG (1982) Effect of dose size on the pharmacokinetics of intravenous hydrocortisone during endogenous hydrocortisone suppression. J. Pharmacokinet. Biopharm. 10: 147-156. Mager DE and Jusko WJ (2002) Quantit…
299	Hydroflumethazide	135-09-1	2.2	9.7	NF	3.8	5.2	Broers O and Jacobsen S (1979) Distribution and elimination of hydroflumethiazide in man. Eur. J. Clin. Pharmacol. 16: 125-131.	VDss calculated from reported micro constants. CL calculated from Vdbeta and t1/2
300	Hydromorphone	466-99-9	4.3	28	0.86	2.6	2.3	Dilaudid-HP Product Label
301	Hydroxychloroquine	118-42-3	700	11	0.57	1300	850	Tett SE, Cutler DJ, Day RO, and Brown KF (1988) A dose-ranging study of the pharmacokinetics of hydroxychloroquine following intravenous administration to healthy volunteers. Br, J. Clin. Pharmacol. 26: 303-313. Brocks DR, Skeith KJ, Johnston C, Emamibafrani J, Davis P, Russell AS, and Jamali F (1994) Hematologic disposition of hydroxychloroquine enantiomers. J. Clin. Pharmacol. 34: 1088-1097.
302	Hydroxycotinine, 3'-	34834-67-8	0.85	1.8	NF	7.9	5.9	Scherer G, Jarczyk L, Heller WD, Biber A, Neurath GB, and Adlkofer F (1988) Pharmacokinetics of nicotine, cotinine, and 3'-hydroxycotinine in cigarette smokers. Klin. Wochenschr. 66(Supp 11): 5-11.	VDss calculated from C vs t data obtained by digitization of the plot provided in the reference.
303	Hydroxydihydroquinidine, 3(S)-	85405-59-0	6.8	12	0.47	9.4	6.7	Jaillon P, Poirier JM, Lecocq B, Jarreau C, Pays M, Richard MO, and Cheymol G (1986) Pharmacokinetics of hydroxy-3(S)-dihydroquinidine in healthy volunteers after intravenous and oral administration. Eur. J. Drug Metab. Pharmacokinet. 11: 233-238. Leroyer R, Varoquaux O, Guillebastres R, Jarreau C, Normand JP, Jaillon P, Advenier C, and Pays M (1986) Study on protein binding of 3-(R)- and 3-(S)-h…
304	Hydroxyimipramine, 2-	303-70-8	6.6	9.2	0.36	12	10	Ciraulo DA, Barnhill JG, Jaffe JH, Ciraulo AM, and Tarmey MF (1990) Intravenous pharmacokinetics of 2-hydroxyimipramine in alcoholics and normal controls. J. Studies Alcohol 51: 366-372.	VDss calclated from C vs t data obtained by digitization of the plot included in the reference.
305	Hydroxystaurosporine, 7-	112953-11-4	0.15	0.0037	0.0022	680	790	Fuse E, Tanii H, Kurata N, Kobayashi H, Shimada Y, Tamura T, Sasaki Y, Tanigawara Y, Lush RD, Headlee D, Figg WD, Arbuck SG, Senderowicz AM, Sausville EA, Akinaga S, Kuwabara T, and Kobayashi S (1998) Unpredicted clinical pharmacology of UCN-01 caused by specific binding to human alpha1-acid glycoprotein. Canc. Res. 58: 3248-3253. Dees EC, Baker SD, O'Reilly S, Rudek MA, Davidson SB, Aylesworth C…	Used data from 95 mg/m2 group.
306	Hydroxyurea	127-07-1	0.52	1.5	1	4.8	3.4	Rodriguez GI, Kuhn JG, Weiss GR, Hilsenbeck SG, Eckardt JR, Thurman A, Rinaldi DA, Hodges S, Von Hoff DD, Rowinsky EK (1998) A bioavailability and pharmacokinetic study of oral and intravenous hydroxyurea. Blood 91:1533-1541
307	Hypericin	548-04-9	0.25	0.13	NF	32	42	Kerb R, Brockmuller J, Staffeldt B, Ploch M, and Roots I (1996) Single dose and steady-state pharmacokinetics of hypericin and pseudohypericin. Antimic. Agents Chemother. 40: 2087-2093.	Data from two subjects with very high variability.
308	Ibandronic Acid (Ibandronate)	114084-78-5	0.55	1.8	0.15	5.1	14	Barrett J, Worth E, Bauss F, and Epstein S (2004) Ibandronate: a clinical pharmacological and pharmacokinetic update. J. Clin. Pharmacol. 44: 951-965	Pharmacokinetic parameters were calculated from C vs t data obtained by digitization of the plot provided in the reference.
309	Ibuprofen	15687-27-1	0.15	0.82	0.006	3	1.6	Martin W, Koselowske G, Toberich H, Kerkmann T, Mangold B, and Augustin J (1990) Pharmacokinetics and absolute bioavailability of ibuprofen after oral administration of ibuprofen lysine in man. Biopharm. Drug Dispos. 11: 265-278. Lee KJ, Mower R, Hollenbeck T, Castelo J, Johnson N, Gordon P, Sinko PJ, Holme K, and Lee YH (2003) Modulation of nonspecific binding in ultrafiltration protein binding …
310	Ibutilide	122647-31-8	12	26	0.6	7.7	7	Jungbluth GL, Della-Coletta ASA, and VanderLugt JT (1991) Evaluation of the pharmacokinetics and pharmacodynamics of ibutilide fumarate and its enantiomers in healthy male volunteers. Pharm. Res. 8: S-249. Howard PA (1999) Ibutilide: an antiarrythmic agent for the treatment of atrial fibrillation or flutter. Ann Pharmacother. 33: 38-47.
311	Idarubicin	58957-92-9	38	24	0.076	26	16	Robert J (1993) Clinical pharmacokinetics of idarubicin. Clin. Pharmacokinet. 24: 275-288. Kessel M, Gieseler F, and Woodcock BG (1999) Influence of serum protein on the uptake and retention of idarubicin by sensitive and multidrug resistant human leukemic cells. Eur. J. Clin. Pharmacol. 55: 369-373.	Compendium of intravenous data with median values.
312	Idazoxan	79944-58-4	3.3	10	NF	5.5	4.2	Muir NC, Lloyd-Jones JG, Nichols JD, and Clifford JM (1986) The pharmacokinetics after intravenous and oral administration in man of the alpha2-adrenoreceptor antagonist idazoxan (RX781094). Eur. J. Clin. Pharmacol. 29: 743-745.	VDss calculated from digitized plots.
313	Ifetroban	143443-90-7	4.4	6.4	NF	11	22	Dockens RC, Santone KS, Mitroka JG, Morrison RA, Jemal M, Greene DS, and Barbhaiya RH (2000) Disposition of radiolabeled ifetroban in rats, dogs, monkeys, and humans. Drug Metab. Dispos. 28: 973-980.
314	Ifosfamide	3778-73-2	0.62	1.1	1	9.4	6.6	Corlett SA, Parker D, and Chrystyn H (1995) Pharmacokinetics of ifosfamide and its enantiomers following a single 1 h intravenous infusion of the racemate in patients with small cell lung carcinoma. Br. J. Clin. Pharmacol. 39: 452-455.
315	Iloprost	78919-13-8	0.37	16	0.4	0.39	0.57	Krause W and Krais T (1986) Pharmacokinetics and pharmacodynamics of the prostacyclin analogue iloproset in man. Eur. J. Clin. Pharmacol. 30: 61-68. Hildebrand M (1997) Pharmacokinetics and tolerablity of oral iloprost in thromboangitis obliterans patients. Eur. J. Clin. Pharmacol. 53: 51-56. Ventavis Product Label.	VDss calculated from digitized plots. VDss and CL data are the average of the two reports; t1/2 data are only from Hildebrandt.
316	Imatinib	152459-95-5	3.9	3.3	0.05	20	22	Peng B, Dutreix C, Mehring G, Hayes MJ, Ben-Am M, Sieberling M, Pokorny R, Capdeville R, and Lloyd P (2004) Absolute bioavailability of imatinib (Glivec) orally versus intravenous infusion. J. Clin. Pharmacol. 44: 158-162. Gleevec Product Label.	VDss calculated from C vs t data obtained by digitization of the plot provided in the reference.
317	Imipenem	64221-86-9	0.24	3	0.86	1.3	0.95	Saito A (1991) Pharmacokinetics of panipenem/betamipron. Chemotherapy 39(Suppl. 3): 227-235. Bergan T (1984) Pharmacokinetics of beta-lactam antibiotics. Scand. J. Infect. Dis. 42(Suppl): 83-98.	VDss calculated from C vs t data provided in the reference.
318	Imipramine	50-49-7	12	13	0.075	15	16	Brosen K and Gram LF (1988) First-pass metabolism of imipramine and desipramine: impact of the sparteine oxidation phenotype. Clin. Pharmacol. Ther. 43: 400-406. Nyberg G and Maartensson E (1984) Determination of free fractions of tricyclic antidepressants. Naunyn-Sch. Arch. Pharmacol. 327: 260-265. Danon A and Chen Z (1979) Binding of imipramine to plasma proteins: effect of hyperlipoproteinemia…	VDss was calculatd using C vs t data obtained from plots provided in the reference.
319	Imipramine N-oxide	6829-98-7	1.9	12	NF	2.6	1.8	Nagy A and Hansen T (1978) The kinetics of imipramine N-oxide in man. Acta Pharmacol. Toxicol. 42: 58-67.	VDss obtained from C vs t data obtained by digitization of the plot provided in the reference.
320	Indinavir	150378-17-9	0.82	18	0.36	0.76	1	Yeh KC, Stone JA, Carides AD, Rolan P, Woolf E, and Ju WD (1999) Simultaneous investigation of indinavir nonlinear pharmacokinetics and bioavailability in healthy volunteers using stable isotope labeling technique: study design and model-independent data analysis. J. Pharm. Sci. 88: 568-573. Boffito M, Hoggard PG, Reynolds HE, Bonora S, Meaden ER, Sinicco A, Di Perri G, and Back DJ (2002) The unb…	VDss and t1/2 were calculated from data obtained by digitization of C vs t plots (group C) provided in the report.
321	Indocyanine Green	3599-32-4	0.035	6.8	0.05	0.086	0.065	Vanakoski J, Idanpaan-Heikkila JJ, and Seppala T (1996) Exposure to high environmental temperature in the sauna does not change plasma indocyanine green (ICG) clearance in healthy subjects. Pharmacol. Toxicol. 78: 94-98. IC-Green Product Label.
322	Indomethacin	53-86-1	0.096	1.3	0.01	1.2	1.4	Yeh KC, Berger ET, Breault GO, and Lei BE (1982) Effect of sustained release on the pharmacokinetic profile of indomethacin in man. Biopharm. Drug Dispos. 3: 219-230. Indocin Product Label.	CL and half-life were calculated from C vs t data included in the reference. VDss was calculated using micro rate constants provided.
323	Indoramin	26844-12-2	4.9	20	0.15	4.1	4.3	Norbury HM, Franklin RA, Marrott PK, and Warrington SJ (1983) Pharmacokinetics of intravenous indoramin in middle aged male and female volunteers. Eur. J. Clin. Pharmacol. 25: 243-246.	Cited fu value at lowest concentration which was relevant to the plasma concentrations. VDss calclated from digitized plot.
324	Intoplicine	125974-72-3	11	18	NF	11	19	Abigerges D, Armand JP, Chabot GG, Bruno R, Bissery MC, Bayssas M, Klink-Alakl M, Clavel M, and Catimel G (1996) Phase I and pharmacology study of intoplicine (RP 60475; NSC 645008), a novel topoisomerase I and II inhibitor, in cancer patients. Anti-Cancer Drugs 7: 166-174
325	Iohexol	66108-95-0	0.16	2	1	1.3	1.5	Back SE, Krutzen E, and Nilsson-Ehle P (1988) Contrast media as markers for glomerular filtration: a pharmacokinetic comparison of four agents. Scand. J. Clin. Lab Invest. 48: 247-253.	VDss calculated from C vs t data obtained by digitization of the plot provided in the reference.
326	Iopamidol	60166-93-0	0.28	1.9	1	2.5	2.1	McKinstry DN, Rommel AJ, and Sugerman AA (1984) Pharmacokinetics, metabolism, and excretion of iopamidol in healthy subjects. Invest. Radiol. 19: s171-s174.
327	Iopromide	73334-07-3	0.22	1.4	0.99	2.6	2.6	Krause W, Schuhmann-Giampieri G, Staks T, and Kaufmann J (1994) Dose proportionality of iopromide pharmacokinetics and tolerability after IV injection in healthy volunteers. Eur. J. Clin. Pharmacol. 46: 339-343. Ultravist Product Label
328	Iothalamic acid (Iothalamate)	2276-90-6	0.17	2.4	0.98	1.2	1.3	Back SE, Krutzen E, and Nilsson-Ehle P (1988) Contrast media as markers for glomerular filtration: a pharmacokinetic comparison of four agents. Scand. J. Clin. Lab Invest. 48: 247-253. Bollerup AC, Hesse B, and Steiness E (1975) Renal handling of iodamide and diatrizoate. Evidence of active tubular secretion of iodamide. Eur. J. Clin. Pharmacol. 9: 63-67.	VDss calculated from C vs t data obtained by digitization of the plot provided in the reference.
329	Irbesartan	138402-11-6	0.94	2.3	0.1	6.8	14	Vachharajani NN, Shyu WC, Chando TJ, Everett DW, Greene DS, Barbhaiya RH (1998) Oral bioavailabiity and disposition characteristics of irbesartan, an angiotensin antagonist, in healthy volunteers. J. Clin. Pharmacol. 38: 702-707. Avalide Product Label.
330	Irinotecan	97682-44-5	3.5	7	0.51	8.3	9	Xie R, Mathijssen RHJ, Sparreboom A, Verweij J, and Karlsson MO (2002) Clinical pharmacokinetics of irinotecan and its metabolites in relation with diarrhea. Clin. Pharmacol. Ther. 72: 265-275. Camptosar Product Label.	No t1/2 reported from Xie, et al.
331	Irofulven	158440-71-2	3.1	140	NF	0.4	0.3	Paci A, Rezai K, Deroussent A, De Valeriola D, Re M, Weill S, Cvitkovic E, Kahatt C, Shah A, Waters S, Weems G, Vassal G, and Lokiec F (2006) Pharmacokinetics, metabolism, and routes of excretion of intravenous irofulven in patients with advanced solid tumors. Drug Met. Disp. 34: 1918-1926.
332	Isepamicin	58152-03-7	0.32	1.3	0.95	4.1	24	Nomeir AA, Radwanski E, Cutler D, Affrime M, Christopher D, Korduba C, Batra V, Lin C, and Cayen MN (1997) Single-dose pharmacokinetics of isepamicin in young and geriatric volunteers. J. Clin. Pharmacol. 37: 1021-1030. Tod M, Padoin C, and Petitjean O (2000) Clinical pharmacokinetics and pharmacodynamics of isepamicin. Clin. Pharmacokinet. 38: 205-223.
333	Isoniazide	54-85-3	0.82	7.4	1	1.8	1	Advenier C, St.Aubin A, Gobert C, Houin G, Albengres E, and Tillement JP (1980) Pharmacokinetics of isoniazid in the elderly. Br. J. Clin. Pharmacol. 10: 167-169. Kurz H, Mauser-Ganshorn A, and Stickel HH (1977) Differences in the binding of drugs to plasma proteins from newborn and adult man. I. Eur. J. Clin. Pharmacol. 11: 463-467.	VDss calculated from reported micro rate constants. CL and t1/2 are for fast acetylators. CL and t1/2 for slow acetylatore were 3.7 mL/min/kg and 3.1h, respectively.
334	Isoproterenol	7683-59-2	1.5	56	0.71	0.43	0.41	Illi A, Sundberg S, Ojala-Karlsson P, Korhonen P, Scheinin M, and Gordin A (1995) The effect of entacapone on the disposition and hemodynamic effects of intravenous isoproterenol and epinephrine. Clin. Pharmacol. Ther. 58: 221-227. Sager G, Bratlid H, and Little C (1987) Binding of catecholamines to alpha-1 acid glycoprotein, albumin and lipoproteins in human serum. Biochem. Pharmacol. 36: 3607-3…	Pharmacokinetic parameters were calculated from C vs t data obtained by digitization of the plot provided in the reference.
335	Isosorbide Dinitrate	87-33-2	1.9	31	0.72	1	1.68667	Platzer R, Reutemann G, and Galeazzi RL (1982) Pharmacokinetics of intravenous isosorbide dinitrate. J. Pharmacokinet. Biopharm. 10: 575-586. Santoni Y, Iliadis A, Cano JP, Luccioni R, and Frances Y (1986) Pharmacokinetics of isosorbide dinitrate and its mononitrate metabolites after intravenous infusion. J. Pharmacokinet. Biopharm. 14: 1-17. Straehl P and Galeazzi RL (1985) Isosorbide dinitrate …
336	Isosorbide-2-Mononitrate	16106-20-0	0.86	6.2	NF	2.3	1.9	Straehl P, Galeazzi RL, and Soliva M (1984) Isosorbide 5-mononitrate and isosorbide 2-mononitrate kinetics after intravenous and oral dosing. Clin. Pharmacol. Ther. 36: 485-491.
337	Isosorbide-5-Mononitrate	16051-77-7	0.7	2	1	5.8	4.1	Major RM, Taylor T, Chasseaud LF, Darragh A, and Lambe RF (1984) Isosorbide 5-mononitrate kinetics. Clin. Pharmacol. Ther. 35: 653-659. Straehl P, Galeazzi RL, and Soliva M (1984) Isosorbide 5-mononitrate and isosorbide 2-mononitrate kinetics after intravenous and oral dosing. Clin. Pharmacol. Ther. 36: 485-491.
338	Isoxicam	34552-84-6	0.19	0.07	0.035	44	33	Kolle EU and Vollmer KO (1986) Pharmacokinetics of isoxicam following intravenous, intramuscular, oral and rectal administration in healthy volunteers. Br. J. Clin. Pharmacol. 22(Suppl 2): 135S-141S. Jolliet P, Simon N, Bree F, Urien S, Pagliara A, Carrupt PA, Testa B, and Tillement JP (1997) Blood-to-brain transfer of various oxicams: effects of plasma binding on their brain delivery. Pharm. Res…	VDss calculated from C vs t data obtained by digitization of plots in the reference.
339	Isradipine	75695-93-1	1.5	26	0.04	1	3.3	Christensen HR, Antonsen K, Simonsen K, Lindekar A, Bonde J, Angelo HR, and Kampmann JP (2000) Bioavailability and pharmacokinetics of isradipine after oral and intravenous administration: half-life shorter than expected? Pharmacol. Toxicol. 86: 178-182. Kirsten R, Nelson K, Kirsten D, and Heintz B (1988) Clinical pharmacokinetics of vasodilators. Part I. Clin. Pharmacokinet. 34: 457-482.	VDss was calculated from C vs t data obtained by digitization of the plot provided in the reference.
340	Itraconazole	84625-61-6	7.4	5.1	0.002	24	25	Heykants J, Van Peer A, Van de Velde V, Van Rooy P, Meuldermans W, Lavrijsen K, Woestenborghs R, Van Cutsem J, and Cauwenbergh G (1989) The clinical pharmacokinetics of itraconazole: an overview. Mycoses 32(Suppl 1): 67-87.	VDss was calculated from C vs t data obtained by digitization of the plot provided in the reference.
341	IVL745	229627-58-1	0.25	11	NF	0.38	1.6	Rohatagi S, Shah B, Zhang J, Zeng Z, Kirkesseli S, and Jensen BK (2004) Estimating mass balance for inhaled drugs in humans: An example with a VLA-4 antagonist, IVL745. J. Clin. Pharmacol. 44: 348-358.
342	Ixabepilone	219989-84-1	11	10	NF	18	17	Abraham J, Agrawal M, Bakke S, Rutt A, Edgerly M, Balis FM, Widemann B, Davis L, Damle B, Sonnichsen D, Lebwohl D, Bates S, Kotz H, and Fojo T (2003) Phase I trial and pharmacokinetic study of BMS-247550, an epothilone B analog, administered intravenously on daily schedule for five days. J. Clin. Oncol. 21: 1866-1873.
343	Kanamycin	59-01-8	0.26	1.4	0.99	3.1	2.1	Kirby WMW, Clarke JT, Libke RD, and Regamey C (1976) Clinical pharmacology of amikacin and kanamycin. J. Infect. Dis. 134: S312-S315. Gordon RC, Regamey C, and Kirby WMM (1972) Serum protein binding of the aminoglycoside antibiotics. Antimic. Agents Chemother. 2: 214-216. Clarke JT, Libke RD, Regamey C, and Kirby WMM (1974) Comparative pharmacokinetics of amikacin and kanamycin. Clin. Pharmacol. …	VDss, CL not reported in Clarke paper but could be digitized.
344	Ketamine	6740-88-1	2.9	19	0.47	2.5	2.8	Geisslinger G, Hering W, Thomann P, Knoll R, Kamp HD, and Brune K (1993) Pharmacokinetics and pharmacodynamics of ketamine enantiomers in surgical patients using a stereoselective analytical method. Br. J. Anaesth. 70: 666-671. Pedraz JL, Lanao JM, Calvo MB, Muriel C, Hernandez-Arbeiza J, and Dominguez-Gil A (1987) Pharmacokinetic and clinical evaluation of ketamine administered by i.v. and epidu…	Racemate; data were combined.
345	Ketanserin	74050-98-9	3.9	6.7	0.055	9.7	12	Heykants J, Van Peer A, Woestenborghs R, Gould S, and Mills J (1986) Pharmacokinetics of ketanserin and its metabolite ketanserin-ol in man after intravenous, intramuscular and oral administration. Eur. J. Clin. Pharmacol. 31: 343-350. Persson B, Pettersson A, and Hedner T (1987) Pharmacokinetics of ketanserin in patients wuith essential hypertension. Eur. J. Clin. Pharmacol. 32: 259-265. Trenk D…
346	Ketobemidone	469-79-4	0.48	9.2	NF	0.87	2.3	Bondesson U, Arner S, Anderson P, Boreus LO, and Hartvig P (1980) Clinical pharmacokinetics and oral bioavailability of ketobemidone. Eur. J. Clin. Pharmacol. 17: 45-50.	Calculated from reported rate micro-constants.
347	Ketoprofen	22071-15-4	0.13	1.6	0.008	1.4	2.1	Debruyne D, de Ligny BH, Ryckelynck JP, Albessard F, and Moulin M (1987) Clinical pharmacokinetics of ketoprofen after single intravenous administration as a bolus or infusion. Clin. Pharmacokinet. 12: 214-221. Lee KJ, Mower R, Hollenbeck T, Castelo J, Johnson N, Gordon P, Sinko PJ, Holme K, and Lee YH (2003) Modulation of nonspecific binding in ultrafiltration protein binding studies. Pharm. Res…
348	Ketorolac	74103-06-3	0.11	0.35	0.0068	5.2	5.1	Jung D, Mroszczak E, and Bynum L (1988) Pharmacokinetics of ketorolac tromethamine in humans after intravenous, intramuscular and oral administration. Eur. J. Clin. Pharmacol. 35: 423-425. Reed MD, Myers CM, and Blumer JL (2001) Influence of midazolam on the protein binding of ketorolac. Curr. Ther. Res. 62: 558-565. Mroszczak EJ, Lee FM, Combs D, Sarnquist FH, Huang BL, Wu AT, Tokes LG, Maddox M…
349	KRN-5500	151276-95-8	0.17	2.7	NF	1.1	1.3	Supko JG, Eder JP, Ryan DP, Seiden MV, Lynch TJ, Amrein PC, Kufe DW, and Clark JW (2003) Phase I clinical trial and pharmacokinetic study of the spicamycin analog KRN5500 administered as a 1-hour intravenous infusion for five consecutive days to patients with refractory solid tumors. Clin. Canc. Res. 9: 5178-5186.
350	KW-2170	207862-44-0	12	18	NF	11	32	Saeki T, Eguchi K, Takashima S, Sugiura T, Hida T, Horikoshi N, Aiba K, Kuwabara T, and Ogawa M (2004) Phase I and pharmacokinetic study of KW-2170, a novel pyrazoloacridone compound, in patients with malignant tumors. Cancer Chemother. Pharmacol. 54: 459-468.
351	Labetalol	36894-69-6	4.8	23	0.5	3.5	4.4	Cheymol G, Poirier JM, Carrupt PA, Testa B, Weissenburger J, Levron JC, and Snoeck E (1997) Pharmacokinetics of .beta.-adrenoceptor blockers in obese and normal volunteers. Br. J. Clin. Pharmacol. 43: 563-570. Martin LE, Hopkins R, and Bland R (1976) Metabolism of labetalol by animals and man. Br. J. Clin. Pharmacol. (Supp): 695-710
352	Lamifiban	144412-49-7	0.29	1.9	0.94	2.5	2.1	Lave T, Saner A, Coassolo P, Brandt R, Schmitt-Hoffmann AH, and Chou RC (1996) Animal pharmacokinetics and interspecies scaling from animals to man of lamifiban, a new platelet aggergeation inhibitor. J. Pharm. Pharmacol. 48: 573-577.
353	Lamivudine	134678-17-4	1.3	4.8	0.94	4.4	9.1	Yuen GJ, Morris DM, Mydlow PK, Haidar S, Hall ST, and Hussey EK (1995) Pharmacokinetics, absolute bioavailability, and absorption characteristics of lamivudine. J. Clin. Pharmacol. 35: 1174-1180. Takubo T, Hirayama S, Moriya T, Minamide Y, Kato T, Nakamura R, and Kinami J (1997) Studies on the metabolic fate of lamivudine (II): tissue distribution, transfer into fetus and milk, plasma protein bin…
354	Lansoprazole	103577-45-3	0.28	4.4	0.021	1.1	1	Gerloff J, Mignot A, Barth H, and Heintze K (1996) Pharmacokinetics and absolute bioavailability of lansoprazole. Eur. J. Clin. Pharmacol. 50: 293-297. Freston JW, Pilmer BL, Chiu YL, Wang Q, Stolle JC, Griffin JS, and Lee CQ (2004) Evaluation of the pharmacokinetics and pharmacodynamics of intravenous lansoprazole. Alimentary Pharmacol. Ther. 19: 1111-1122. Karol MD, Machinist JM, and Cavanaugh …
355	Letrozole	112809-51-5	1.9	0.57	0.41	59	45	Sioufi A, Gauducheau N, Pineau V, Marfil F, Jaouen A, Cardot JM, Godbillon J, Czendlik C, Howald H, Pfister C, and Vreeland F (1997) Absolute bioavailability of letrozole in healthy postmenopausal women. Biopharm Drug Dispos. 18: 779-89. Colussi DM, Parisot CY, and Lefevre GY (1998) Plasma protein binding of letrozole, a new nonsteroidal aromatase enzyme inhibitor. J. Clin. Pharmacol. 38: 727
356	Leuprolide	53714-56-0	0.38	2	0.54	3.1	2.9	Sennello LT, Finley RA, Chu SY, Jagst C, Max D, Rollins DE, and Tolman KGJ (1986) Single-dose pharmacokinetics of leuprolide in humans following intravenous and subcutaneous administration. Pharm. Sci. 75: 158-160. Eligard Product Label
357	Levodopa	59-92-7	1.7	23	0.76	1.2	1.3	Robertson DRC, Wood ND, Everest H, Monks K, Waller DG, Renwick AG, and George CF (1989) The effect of age on the pharmacokinetics of levodopa administered alone and in the presence of carbidopa. Br. J. Clin. Pharmacol. 28: 61-69. Rizzo V, Memmi M, Moratti R, Melzi d'Eril G, and Perucca E (1996) Concentrations of L-dopa in plasma and plasma ultrafiltrates. J. Pharm. Biomed. Anal. 14: 1043-1046
358	Levofloxacin	100986-85-4	1.2	1.9	0.75	11	8.8	Furlanut M, Brollo L, Lugatti E, Di Qual E, Dolcet F, Talmassons G, and Pea F (2003) Pharmacokinetic aspects of levofloxacin 500mg once daily during sequential intravenous/oral therapy in patients with lower respiratory tract infections. J. Antimic. Chemother. 51: 101-106. Bergogne-Berezin E (2002) Clinical role of protein binding of quinolones. Clin. Pharmacokinet. 41: 741-750.
359	Levomepromazine	60-99-1	12	9.9	NF	21	30	Bagli M, Hoflich G, Rao, ML, Langer M, Baumann P, Kolbinger M, Barlage U, Kasper S, and Moller HJ (1995) Bioequivalence and absolute bioavailability of oblong and coated levomepromazine tablets in CYP2D6 phenotyped subjects. Int. J. Clin. Pharmacol. Ther. 33: 646-652.
360	Levonorgestrel	797-63-7	1.5	1.8	0.025	14	9.4	Stead RJ, Grimmer SFM, Rogers SM, Back DJ, Orme MLE, Hodson ME, and Batten JC (1987) Pharmacokinetics of contraceptive steroids in patients with cystic fibrosis. Thorax 42: 59-64. Aviane Product Label.
361	Levosimendan	141505-33-1	0.24	3.8	0.02	1.1	1.1	Sundberg S, Antila S, Scheinin H, Hayha M, Virtanen M, and Lehtonen L (1998) Integrated pharmacokinetics and pharmacodynamics of the novel calcium sensitizer levosimendan as assessed by systolic time intervals. Int. J. Clin. Pharmacol. Ther. 36: 629-635. Lilleberg J, Antila S, Karlsson M, Mieminen MS, and Pentkainen PJ (1994) Pharmacokinetics and pharmacodynamics of simendan, a novel calcium sens…
362	Lidocaine	137-58-6	1.8	16	0.33	1.9	1.6	Bauer LA, Brown T, Gilbaldi M, Hudson L, Nelson S, Raisys V, and Shea JP (1982) Influence of long-term infusions on lidocaine kinetics. Clin. Pharmacol. Ther. 31: 433-437. Bennett PN, Aarons LJ, Bending MR, Steiner JA, and Rowland M (1982) Pharmacokinetics of lidocaine and its deethylated metabolite: dose and time dependecy studies in man. J. Pharmacokinet. Biopharm. 10: 265-281. Grossman SH, Dav…
363	Lincomycin	154-21-2	1	2.1	0.14-0.72	7.5	5.6	Gwilt PR and Smith RB (1986) Protein binding and pharmacokinetics of incomycin following intravenous administration of high doses. J. Clin. Pharmacol. 26: 87-90.	Averaged values over three doses. Saturable protein binding reported.
364	Linezolid	165800-03-3	0.58	1.8	0.69	5.4	4.5	Stalker DJ, Jungbluth GL, Hopkins NK, and Batts DH (2003) Pharmacokinetics and tolerance of single- and multiple-dose oral and intravenous linezolid, an oxazolidinone antibiotic, in healthy volunteers. J. Antimic. Chemother. 51: 1239-1246. Zyvox Product Label.
365	Lisinopril	76547-98-3	0.89	1.2	1	12	42	Beermann B, Till AE, Gomez HJ, Hichens M, Bolognese JA, and Junggren IL (1989) Pharmacokinetics of lisinopril (IV/PO) in healthy volunteers. Biopharm. Drug Dispos. 10: 397-409. Kirsten R, Nelson K, Kirsten D, and Heintz B (1988) Clinical pharmacokinetics of vasodilators. Part I. Clin. Pharmacokinet. 34: 457-482.	VDss calculated using C vs t data obtained by digitization of the plots provided in the reference. Dose levels averaged.
366	Lithium Carbonate	554-13-2	0.62	1.3	1	7.9	7.8	Waring WS, Webb DJ, Maxwell SR (2002) Lithium carbonate as a potential pharmacological vehicle: intravenous kinetics of single-dose administration in healthy subjects. Eur. J. Clin. Pharmacol. 58: 431-434.
367	Lorazepam	846-49-1	1.3	1	0.09	22	17	Wermeling DPH, Miller JL, Archer SM, Manaligod JM, and Rudy AC (2001) Bioavailability and pharmacokinetics of lorazepam after intranasal, intravenous, and intramuscular administration. J. Clin. Pharmacol. 41: 1225-1231. Desmond PV, Roberts RK, Wood AJJ, Dunn GD, Wilkinson, GR, Schenker S (1980) Effect of heparin administration on plasma binding of benzodiazepines. Br. J. Clin. Pharmacol. 9: 171-1…
368	Lorcainide	59729-31-6	6.6	16	0.15	6.9	6.5	Klotz U, Mueller-Seydlitz P, and Heimburg P (1979) Disposition and antiarrythmic effect of lorcainide. Int. J. Clin. Pharmacol. Biopharm. 17: 152-158. Klotz U, Mueller-Seydlitz P, and Heimburg P (1978) Pharmacokinetics of lorcainide in man: a new antiarrhythmic agent. Clin. Pharmacokinet. 3: 407-418.
369	Lormetazepam	848-75-9	1.6	4	0.12	6.7	4.9	Humpel M, Illi V, Milius W, Wendt H, and Kurowski M (1979) The pharmacokinetics and biotransformation of the new benzodiazepine lormetazepam in humans. Eur. J. Drug Metab. Pharmacokinet. 4: 237-243.	Pharmacokinetic parameters were calculated from C vs t obtained by digitization of the plot included in the reference.
370	Losartan	114798-26-4	0.37	8.2	0.01	0.75	1.8	Lo MW, Goldberg MR, McCrea JB, Lu H, Furtek CI, and Bjornsson TD (1995) Pharmacokinetics of losartan, an angiotensin II receptor antagonist, and its active metabolite EXP3174 in humans. Clin. Pharmacol. Ther. 58: 641-649. Kirsten R, Nelson K, Kirsten D, and Heintz B (1988) Clinical pharmacokinetics of vasodilators. Part I. Clin. Pharmacokinet. 34: 457-482.
371	Lovastatin (acid)	75225-51-3	0.87	7.2	0.043	1.3	1.4	Duggan DE, Chen IW, Bayne WF, Halpin RA, Duncan CA, Schwartz MS, Stubbs RJ, Vickers S (1989) The physiological disposition of lovastatin. Drug Metab Dispos. 17: 166-173.	Pharmacokinetic paramaters were calculated using C vs t data obtained by digitization of the plot provided in the reference.
372	Loxiglumide	107097-80-3	0.24	1	NF	4	5.2	Setnikar I, Chiste R, Makovec F, Rovati LC, and Warrington SJ (1988) Pharmacokinetics of loxiglumide after single intravenous or oral doses in man. Arz. Forsch. 38: 716-720.	VDss was calculated from rate micro-contants provided in the reference.
373	Maprotiline	10262-69-8	45	14	0.11	54	51	Maguire KP, Norman TR, Burrows GD, and Scoggins BA (1980) An evaluation of maprotiline intravenous kinetics and comparison of two oral doses. Eur. J. Clin. Pharmacol.18: 249-254. Lynn K, Braithwaite R, Dawling S, and Rosser R (1981) Comparison of the serum protein binding of maprotiline and phenytoin in uraemic patients on haemodialysis. Eur. J. Clin. Pharmacol. 19: 73-77.	VDss calculated from reported compartmental paramaters included in the reference by Maguire, et al.
374	Maxipost	187523-35-9	10	15	0.0038	11	37	Zhang D, Krishna R, Wang L, Zeng J, Mitroka J, Dai R, Narasimhan N, Reeves RA, Srinivas NR, and Klunk LJ (2005) Metabolism, pharmacokinetics, and protein covalent binding of radiolabeled maxipost (BMS-204352) in humans. Drug Metab. Dispos. 33: 83-93. Krishna R, Yao M, Kaczor D, Vachharajani N, and Srinivas NR. (2001) In vitro protein binding studies with BMS-204352: lack of protein binding displa…
375	Mebendazole	31431-39-7	1.2	15	0.086	1.3	1.1	Dawson M, Braithwaite PA, Roberts MS, Watson TR (1985) The pharmacokinetics and bioavailability of a tracer dose of [3H]-mebendazole in man. Br. J. Clin. Pharmacol. 19: 79-86.
376	Medroxalol	56290-94-9	7.9	16	NF	8.2	11	Haegele KD, Jaillion P, Cheymol G, Alken RG, Schechter PJ, and Koch-Weser J (1983) Kinetics of medroxalol, a beta and alpha-adrenoceptor antagonist. Clin. Pharmacol. Ther.34: 785-791. Keeley FJ, Weiner DL, and Okerholm RA (1983) Bioavailability of medroxalol in man. Biopharm. Drug Dispos. 4: 305-309.	Calculations were done using data from digitization of the C vs t plot in the reported reference by Keeley et al. and from C vs t data listed in Haegele et al..
377	Melagatran	159776-70-2	0.23	1.9	0.93	2	1.6	Eriksson UG, Bredberg U, Hoffmann KJ, Thuresson A, Gabrielsson M, Ericsson H, Ahnoff M, Gislen K, Fager G, and Gustafsson D (2003) Absorption, distribution, metabolism, and excretion of ximelagatran, an oral direct thrombin inhibitor, in rats, dogs, and humans. Drug Metab. Dispos. 31: 294-305.
378	Meloxicam	71125-38-7	0.15	0.12	0.003	21	18	Narjes H, Turck D, Busch U, Heinzel G, and Nehmiz G (1996) Pharmacokinetics and tolerability of meloxicam after i.m. administration. Br. J. Clin. Pharmacol. 41: 135-139. Busch U, Heinzel G, and Narjes H (1995) The effect of cholestyramine on the pharmaciokinetics of meloxicam, a new non-steroidal anti-inflammatory drug (NSAID), in man. Eur. J. Clin. Pharmacol. 48: 269-272. Turck D, Busch U, Heinz…
379	Melperone	3575-80-2	14	46	NF	5	3.9	Borgstrom L, Larsson H, and Molander L (1982) Pharmacokinetics of parenteral and oral melperone in man. Eur. J. Clin. Pharmacol. 23: 173-176.	Data from 20 mg dose. All pharmacokinetic parameters calculated from digitized C vs t plot in the reported reference.
380	Melphalan	148-82-3	0.48	7	0.14	1.1	1	Woodhouse KW, Hamilton P, Lennard A, and Rawlins MD (1983) The pharmacokinetics of melphalan in patients with multiple myeloma: an intravenous/oral study using a conventional dosing regimen. Eur. J. Clin. Pharmacol. 24: 283-285. Hersh MR, Ludden TM, Kuhn JG, and Knight WA (1983) Pharmacokinetics of high dose melphalan. Invest. New Drugs. 1: 331-334. Gera S, Musch E, Osterheld HKO, and Loos U (198…
381	MEN-10755	169317-77-5	2.4	2.5	NF	17	21	Bos AME, deVries EGE, Dombernovsky P, Aamdal S, Uges DRA, Schrijvers D, Wanders J, Roelvink MWJ, Hanauske AR, Bortini S, Capriati A, Crea AEG, and Vermorken JB (2001) Pharmacokinetics of MEN-10755, a novel anthracycline disaccharide analogue, in two phase 1 studies in adults with advanced solid tumors. Canc. Chemother. Pharmacol. 48: 361-369.
382	Meperidine	57-42-1	2.3	4.9	0.42	6.4	7.9	Chan K, Tse J, Jennings F, and Orme ML (1987) Pharmacokinetics of low-dose intravenous pethidine in patients with renal dysfunction. J. Clin. Pharmacol. 27: 516-22. Verbeek RK, Cardinal JA, and Wallace SM (1984) Effect of age and sex on the plasma binding of acidic and basic drugs. Eur. J. Clin. Pharmacol. 27: 91-97.	VDss calculated from C vs t data provided in the reference.
383	Mepivacaine	96-88-8	0.95	6.8	0.3	2.5	2	Burm AGL, Cohen IMC, van Kleef JW, Vletter AA, Olieman W, and Groen K (1997) Pharmacokinetics of the enantiomers of mepivacaine after intravenous administration of the racemate in volunteers. Anesth. Analg. 84: 85-89. Allgayer H, Zahringer J, Bach P, and Bircher J (1984) Lack of effect of haemodialysis on mebendazole kinetics: studies in a patient with echinococcosis and renal failure. Eur. J. Cl…	Average of two enantiomers.
384	Meprobamate	57-53-4	0.7	0.6	1	19	14	Held H and Oldershausen HF (1969) Zur pharmakokinetik von meprobamat bei chronischen hepatopathien und arzneimittelsucht. Klin. Wschr. 47: 78-80. Douglas JF, Bradshaw WH, Ludwig BJ, and Powers D (1964) Interaction of plasma protein with related 1,3-propanediol dicarbamates. Biochem. Pharmacol. 13: 537-539.	Pharmacokinetic parameters were calculated from C vs t data obtained by digitization of the plot provided in the reference.
385	Meptazinol	54340-58-8	3.3	28	0.73	2	1.7	Norbury HM, Franklin RA, and Graham DF (1983) Pharmacokinetics of the new analgesic, meptazinol, after oral and intravenous administration to volunteers. Eur. J. Clin. Pharmacol. 25: 77-80. Gepts E, Sonck WA, Camu F, and Vercruysse A (1987) Pharmacokinetics of intravenously administered meptazinol during general anesthesia in man. Eur. J. Anaesth. 4: 35-43. Franklin RA (1988) The clinical pharmac…	VDss was calculated from C vs t data provided in the reference by Norbury, et al.
386	Mercaptopurine, 6-	50-44-2	1	15	0.85	1.11111	1	Coffey JJ, White CA, Lesk AB, Rogers WI, and Seppick AA (1972) Effect of allopurinol on the pharmacokinetics of 6-mercaptopurine *NSC 755) in cancer patients. Cancer Res. 32: 1283-1289. Esposito M, Rosso R, and Santi L (1974) Plasma protein binding of antineoplastic drugs in rats and humans. IRCS Library Compendium 2: 1180.	Pharmacokinetic parameters were calculated using the mean C vs t values from three study subjects receiving intravenous 500 mg/m2.
387	Meropenem	96036-03-2	0.3	3.9	0.87	1.3	1	Burman LA, Nilsson-Ehle I, Hutchinson M, Haworth SJ, and Norrby SR (1991) Pharmacokinetics of meropenem and its metabolite ICI 213,689 in healthy subjects with known renal metabolism of imipenem. J. Antimic. Chemother. 27: 219-224. Leroy A, Fillastre JP, Etienne I, Borsa-Lebas F, and Humbert G (1992) Pharmacokinetics of meropenem in subjects with renal insufficiency. Eur. J. Clin. Pharmacol. 42: …
388	Metformin	657-24-9	0.64	7.4	1	1.4	1.7	Pentikainen PJ, Neuvonen PJ, and Penttila A (1979) Pharmacokinetics of metformin after intravenous and oral administration to man. Eur. J. Clin. Pharmacol. 16: 195-202.	VDss calculated from reported rate micro-constants.
389	Methadone	76-99-3	4.4	1.7	0.21	43	31	Nilsson MI, Gronbladh L, Widerlov E, and Anggard E (1983) Pharmacokinetics of methadone in methadone maintenance treatment: characterization of therapeutic failures. Eur. J. Clin. Pharmacol. 25: 497-501. Kristensen K, Blemmer T, Angelo HR, Christrup LL, Drenck NE, Rasmussen SN, and Sjoegren P (1996) Stereoselective pharmacokinetics of methadone in chronic pain patients. Ther. Drug Monit. 18: 221-…
390	Methamphetamine	537-46-2	4.3	4.4	0.85	16	12	Harris DS, Boxenbaum H, Everhart ET, Sequeira G, Mendelson JE, and Jones RT (2003) The bioavailability of intranasal and smoked methamphetamine. Clin. Pharmacol. Ther. 74: 475-486. Cook CE, Jeffcoat AR, Hill JM, Pugh DE, Patetta PK, Sadler BM, White WR, and Perez-Reyes M (1993) Pharmacokinetics of methamphetamine self-administered to human subjects by smoking S-(+)-methamphetamine hydrochloride. …	Values for individual stereoisomers were averaged.
391	Methicillin	61-32-5	0.32	6.6	0.43	0.8	0.64	Yaffe SJ, Gerbacht LM, Mosovich LL, Mattar ME, Danish M, and Jusko WJ (1977) Pharmacokinetics of methicillin in patients with cystic fibrosis. J. Infect. Dis. 135: 828-831. Dittert LW, Griffen WO, LaPiana JC, Shainfeld FJ, and Doluisio JT (1969) Pharmacokinetic interpretation of penicillin levels in serum and urine after intravenous administration. Antimic. Ag. Chemother. 42-48. Bergan T (1984) P…	VDss calculated using micro rate constants reported in the reference by Dittert, et al. Concentrations determined using a bioassay.
392	Methimazole	60-56-0	0.86	3.7	NF	3.8	2.4	Hengstmann JH and Hohn H (1985) Pharmacokinetics of methimazole in humans. Klin. Wochenschr. 63: 1212-1217.
393	Methohexital	151-83-7	1.1	12	0.27	1.5	1.6	Breimer DD (1976) Pharmacokinetics of methohexitone following intravenous infusion in humans. Br. J. Anaesth. 48: 643-649. Brand L, Mark LC, Snell MM, Vrindten P, and Dayton PG (1963) Physiologic disposition of methohexital in man. Anesthesiol. 24: 331-335.
394	Methotrexate	59-05-2	0.43	2.1	0.37	3.4	3.9	Bore P, Bruno R, Lena N, Favre R, and Cano JP (1987) Methotrexate and 7-hydroxymethotrexate pharmacokinetics following intravenous bolus administration and high-dose infusion of methotrexate. Eur. J. Canc. Clin. Oncol. 23: 1385-1390. Herman RA, Veng-Pedersen P, Hoffman J, Koehnke R, and Furst DE (1989) Pharmacokinetics of low-dose methotrexate in rheumatoid arthritis patients. J. Pharm. Sci. 78: …
395	Methyldopa	555-30-6	0.69	3.5	0.85	3.3	5.9	Skerjanec A, Campbell NRC, Robertson S, and Tam YK (1995) Pharmacokinetics and presystemic gut metabolism of methyldopa in healthy human subjects. J. Clin. Pharmacol. 35: 275-280. Stenbaek O, Myhre E, Rugstag HE, Arnold E, and Hansen T (1977) Pharmacokinetics of methyldopa in healthy man. Eur. J. Clin. Pharmacol. 12: 117-123. Myhre E, Rugstad HE, and Hansen T (1982) Clinical pharmacokinetics of m…
396	Methylnaltrexone	73232-52-7	2.6	22	NF	2	2.5	Yuan CS, Doshan H, Charney MR, O'Connor M, Karrison T, Maleckar SA, Israel RJ, and Moss J (2005) Tolerability, gut effects, and pharmacokinetics of methylnaltrexone following repeated intravenous administration in humans. J. Clin. Pharmacol. 45: 538-546.
397	Methylnortestosterone, 7α-, 19-	3764-87-2	0.8	20	NF	0.67	0.65	Kumar N, Suvisaari J, Tsong YY, Aguillaume C, Bardin CW, Lahteenmaki P, and Sundaram K (1997) Pharmacokinetics of 7a-methyl-19-nortestosterone in men and cynomolgus monkeys. J. Androl. 18: 352-358.	VDss calculated from C vs t data obtained by digitization of the plot provided in the reference.
398	Methylphenidate	113-45-1	2.2	0.55	0.85	4.5	4.8	Srinivas NR, Hubbard JW, Korchinski ED, and Midha KK (1993) Enantioselective pharmacokinetics of dl-threo-methylphenidate in humans. Pharm. Res. 10: 14-21. De la Torre R, Farre M, Navarro M, Pacifici R, Zuccaro P, and Pichini S (2004) Clinical pharmacokinetics of amfetamine and related substances: monitoring in conventional and non-conventional matrices. Clin. Pharmacokinet. 43: 157-185.	Data for individual stereoisomers were averaged.
399	Methylprednisolone	83-43-2	1.2	6.1	0.23	3.5	2.3	Booker BM, Magee MH, Blum RA, Lates CD, and Jusko WJ (2002) Pharmacokinetic and pharmacodynamic interactions between diltiazem and methylprednisolone in healthy volunteers. Clin. Pharmacol. Ther. 72: 370-382.
400	Methylthiomethylpaclitaxel, 7-	160237-25-2	11	6.4	NF	29	32	Sun W, Stevenson JP, Gallagher ML, Vaughn D, Hahn SM, Haller DG, Cohen M, Kopit J, Gallant G, and O'Dwyer PJ (2003) Phase I and pharmacokinetic trial of the novel taxane BMS-184476 administered as a 1-hour intravenous infusion in combination with cisplatin every 21 days. Clin. Canc. Res. 9: 5221-5227.
401	Metoclopramide	364-62-5	3.2	5.7	0.6	9.4	7.2	Magueur E, Hagege H, Attali P, Singlas E, Etienne JP, and Taburet AM (1991) Pharmacokinetics of metoclopramide in patients with liver cirrhosis. Br. J. Clin. Pharmacol. 31: 185-187. Webb D, Buss DC, Fifield R, Bateman DN, and Routledge PA The plasma protein binding of metoclopramide in health and renal disease. Br. J. Clin. Pharmacol. 21: 334-336.	VDss calculated from C vs t data obtained by digitization of the plot provided in the reference.
402	Metocurine	5152-30-7	0.4	1.2	0.65	5.6	5.1	Brotherton WP and Matteo RS (1981) Pharmacokinetics and pharmacodynamics of metocurine in humans with and without renal failure. Anesthesiology 55: 273-276. Avram MJ, Shanks CA, Henthorn TK, Ronai AK, Kinzer J, and Wilkinson CJ (1987) Metocurine kinetics in patients undergoing operations requiring cardiopulmonary bypass. Clin. Pharmacl. Ther. 42: 576-581.	VDss calculated from micro rate constants provided in the reference.
403	Metolazone	17560-51-9	1.6	1.4	0.05	19	20	Tilstone WJ, Dargie H, Dargie EN, Morgan HC, and Kennedy AC (1974) Pharmacokinetics of metolazone in normal subjects and in patients with cardiac or renal failure. Clin. Pharmacol. Ther. 16: 322-329.	C vs t data was for total radioactivity, justified in the reference that radioactivity in plasma was due to just unchanged drug.
404	Metoprolol	51384-51-1	3.1	13	0.88	4	3.6	Jordo L, Attman PO, Aurell M, Johansson L, Johnsson G, and Regardh CG (1980) Pharmacokinetic and pharmacodynamic properties of metoprolol in patients with impaired renal function. Clin. Pharmacokinet. 5: 169-180. Schaaf LJ, Campbell SC, Mayersohn MB, Vagedes T, and Perrier DG (1987) Influence of smoking and gender on the disposition kinetics of metoprolol. Eur. J. Clin. Pharmacol. 33: 355-361. Ri…	VDss calculated using micro rate constants reported in the reference by Richard et al.
405	Metrizoate	1949-45-7	0.17	2.7	1	1	1.3	Back SE, Krutzen E, and Nilsson-Ehle P (1988) Contrast media as markers for glomerular filtration: a pharmacokinetic comparison of four agents. Scand. J. Clin. Lab Invest. 48: 247-253.	VDss calculated from C vs t data obtained by digitization of the plot provided in the reference.
406	Metronidazole	443-48-1	0.4	0.85	0.96	7.8	7.1	Sanvordekar DR, Chien YW, Lin TK, Lambert HJ (1975) Binding of metronidaole and its derivatives to plasma proteins: an assessment of drug binding phenomenon. J. Pharm Sci. 64: 1797-1803. Bergan T and Thorsteinsson SB (1986) Pharmacokinetics of metronidazole and its metabolites in reduced renal function. Chemotherapy 32: 305-318.	Plasma concentraions determined using a bioassay.
407	Mexiletine	31828-71-4	5.9	8.3	0.36	12	9.9	Pentikainen PJ, Hietakorpi S, Halinen MO, and Lampinen LM (1986) Cirrhosis of the liver markedly impairs the elimination of mexiletine. Eur. J. Clin. Pharmacol. 30: 83-88. McErlane KM, Igwemezie L., Kerr CR (1987) Stereoselective serum protein binding of mexiletine enantiomers in man. Res. Comm. Chem. Path. Pharmacol. 56: 141-144.	Average of two enantiomers.
408	Mezlocillin	51481-65-3	0.09	2.1	0.7	0.71	1.2	Modr Z, Dvoracek K, Janku I, and Krebs V (1982) Beitrag zur pharmakokinetik und dosierung von mezlocillin bei intravenoser infusion. Infection 10(Supp 3): s190-s195. Bergan T (1984) Pharmacokinetics of beta-lactam antibiotics. Scand. J. Infect. Dis. 42(Suppl): 83-98.	VDss calculated using micro rate constants reported in the reference.
409	Mibefradil	116644-53-2	3.1	4	0.005	13	13	Welker HA (1998) Single- and multiple-dse mibefradil pharmacokinetics in normal and hypertensive subjects. J. Pharm. Pharmacol. 50: 983-987. Welker HA, Wiltshire H, and Bullingham R (1998) Clinical pharmacokinetics of mibefradil. Clin. Pharmacokinet. 35: 405-423.
410	Micafungin	235114-32-6	0.21	0.17	0.0023	21	16	Hebert MF, Blough DK, Townsend RW, Allison M, Buell D, Keirns J, and Bekersky I (2005) Concomitant tacrolimus and micafungin pharmacokinetics in healthy volunteers. J. Clin. Pharmacol. 45: 1018-1024. Hebert MF, Smith HE, Marbury TC, Swan SK, Smith WB, Townsend RW, Buell D, Keirns J, and Bekersky I (2005) Pharmacokinetics of micafungin in healthy volunteers, volunteers with moderate liver disease,…
411	Midazolam	59467-70-8	1.1	5.3	0.017	3.5	3.1	Heizmann P, Eckert M, and Ziegler WH (1983) Pharmacokinetics and bioavailability of midazolam in man. Br. J. Clin. Pharmacol. 16: 43s-49s. Pentikainen PJ, Valisalmi L, Himberg JJ, and Crevoisier C (1989) Pharmacokinetics of midazolam following intravenous and oral administration in patients with chronic liver disease and in healthy subjects. J. Clin. Pharmacol. 29: 272-277.
412	Miglitol	72432-03-2	0.28	1.7	1	2.7	2.3	Ahr AH, Boberg M, Brendel E, Krouse HP, and Steinke W (1997) Pharmacokinetics of miglitol. Absorption, distribution, metabolism, and excretion following administration to rats, dogs, and man. Arz. Forsch. 47: 734-745.	Pharmacokinetic parameters were calculated from plasma total radioactivity measurements after administration of radiolabelled miglitol. Analysis of samples showed that miglitol parent drug was the only drug-related entity.
413	Milrinone	78415-72-2	0.25	6.2	0.035	0.67	0.8	Stroshane RM, Koss RF, Biddlecome CE, Luczkowec C, and Edelson J (1984) Oral and intravenous pharmacokinetics of milrinone in human volunteers. J. Pharm. Sci. 73: 1438-1441. Woolfrey SG, Hegbrant J, Thysell H, Fox PA, Lendrem DW, Lockwood GF, Lasher K, Rogers J, and Greenslade D (1995) Dose regimen adjustment for milrinone in congestive heart failure patients with moderate and severe renal failur…
414	Minocycline	10118-90-8	1.6	1.2	NF	22	17	Simon VC, Malerczyk V, Preuss I, Schmidt K, and Grahman H (1976) In vitro aktivitat und pharmakokinetik von minocyclin. Arz. Forsch. 26: 556-560.	Calculated from C vs t data given in Table 4 for the 200 mg dose in Simon, et al.
415	Mirtazapine	85650-52-8	4.2	8	0.15	8.8	15	Voortman G and Paanakker JE (1995) Bioavailability of mirtazepine from Remeron tablets after single and multiple oral dosing. Human Psychopharmacol. 10: s83-s96. Timmer CJ, Sitsen JM, and Delbressine LP (2000) Clinical pharmacokinetics of mirtazapine. Clin. Pharmacokinet. 38: 461-74.
416	Mitoxantrone	65271-80-9	12	7.9	0.25	25	53	Canal P, Attal M, Chatelut E, Guichard S, Huguet F, Muller C, Schlaifer D, Laurent G, Houin G, and Bugat R (1993) Plasma and cellular pharmacokinetics of mitoxantrone in high dose chemotherapeutic regimen for refractory lymphomas. Canc. Res. 53: 4850-4854. Scott LJ and Figgitt DP (2004) Mitoxantrone: a review of its use in multiple sclerosis. CNS Drugs 18: 379-396.
417	Mivacurium (cis/cis)	106791-40-6	0.27	5.2	0.7	0.87	0.83	Head-Rapson AG, Devlin JC, Parker CJ, Hunter JM (1994) Pharmacokinetics of the three isomers of mivacurium and pharmacodynamics of the chiral mixture in hepatic cirrhosis. Br J Anaesth. 73: 613-618. Roy JJ and Varin F (2004) Physicochemical properties of neuromuscular blocking agents and their impact on the pharmacokinetic-pharmacodynamic relationship. Br. J. Anaesth. 93: 241-248.
418	Moclobemide	71320-77-9	1.1	10	0.77	1.8	1.5	Schoerlin MP, Mayersohn M, Korn A, and Eggers H (1987) Disposition kinetics of moclobemide, a monoamine oxidase-A enzyme inhibitor: single and multiple dosing in normal subjects. Clin. Pharmacl. Ther. 42: 395-404. Raaflaub J, Haefelfinger P, and Trautman KH (1984) Single-dose pharmacokinetics of the MAO-inhibitor moclobemide in man. Arz. Forsch. 34: 80-82. Schoerlin MP, Mayersohn M, Hoevels B, Eg…
419	Montelukast	158966-92-8	0.15	0.68	0.002	3.8	5	Zhao JJ, Rogers JD, Holland SD, Larson P, Amin RD, Haesen R, Freeman A, Seiberling M, Merz M, and Cheng H (1997) Pharmacokinetics and bioavailability of montelukast sodium (MK-0476) in healthy young and elderly volunteers. Biopharm. Drug Dispos. 18: 769-777. Cheng H, Leff JA, Amin R, Gertz BJ, De Smet M, Noonan N, Rogers JD, Malbecq W, Meisner D, and Somers G (1996) Pharmacokinetics, bioavailabil…
420	Morphine	57-27-2	2.3	26	0.65	1.47436	2	Owen JA, Sitar DS, Berger L, Briwnell L, Duke PC, and Mitenko PA (1983) Age related morphine kinetics. Clin. Pharmacil. Ther. 34: 364-368. Berkowitz BA (1976) The relationship of pharmacokinetics to pharmacological activity: morphine, methadone and naloxone. Clin. Pharmacokinet. 1: 219-230. Lotsch J, Weiss M, Kobal G, and Geisslinger G (1998) Pharmacokinetics of morphine-6-glucuronide and its for…
421	Morphine-6-Glucuronide	20290-10-2	0.12	2.2	NF	0.91	1.4	Lotsch J, Weiss M, Kobal G, and Geisslinger G (1998) Pharmacokinetics of morphine-6-glucuronide and its formation from morphine after intravenous administration. Clin. Pharmacol. Ther. 63: 629-639.
422	Moxalactam	64952-97-2	0.17	0.72	0.39	3.9	2.9	Wise R, Baker S, and Livingston R (1980) Comparison of cefotaxime and moxalactam pharmacokinetics and tissue levels. Antimic. Ag. Chemother. 18: 369-371. Standiford HC, Drusano GL, Bustamante CI, Rivera G, Forrest A, Tatem B, Leslie J, and Moody M (1986) Imipenem coadministered with cilastatin compared with moxalactam: integration of serum pharmacokinetics and microbiologic activity following sin…
423	Moxifloxacin	151096-09-2	1.4	2.4	0.6	9.7	8.2	Avelox IV Product Label	VDss calculated using C vs t data obtained by digitization of the plot provided in the label.
424	Moxonidine	75438-57-2	1.8	11	0.93	2.7	2.2	Theodor R, Weimann HJ, Weber W, and Michaelis K (1991) Absolute bioavailability of moxonidine. Eur. J. Drug Met. and Pharmacokin. 16: 153-159. Schaefer HG, Toublanc N, and Weimann HJ (1998) The pharmacokinetics of moxonidine. Rev. Contemp. Pharmacother. 9: 481-490.
425	Nadolol	42200-33-9	1.9	2.9	0.14	11	9.2	Morrison RA, Singhvi SM, Creasey WA, and Willard DA (1988) Dose proportionality of nadolol pharmacokinetics after intravenous administration to healthy subjects. Eur. J. Clin. Pharmacol. 33: 625-628. Patel L, Johnston A, and Turner P (1984) Nadolol binding to human serum proteins. J. Pharm. Pharmacol. 36: 414-415.
426	Nafcillin	147-52-4	0.22	3.3	0.13	1.1	0.7	Waller ES, Sharanevych MA, and Yakatan GJ (1982) The effect of probenecid on nafcillin disposition. J. Clin. Pharmacol. 22: 482-489. Bergan T (1984) Pharmacokinetics of beta-lactam antibiotics. Scand. J. Infect. Dis. 42(Suppl): 83-98.	VDss calculated using micro rate constants reported in the reference. Note: Plasma concentrations determined by bioassay; assumes no active metabolites.
427	Nalbuphine	20594-83-6	4.6	22	0.5	3.5	3.7	Aitkenhead AR, Lin ES, and Achola KJ (1988) The pharmacokinetics of oral and intravenous nalbuphine in healthy volunteers. Br. J. Clin. Pharmacol. 25: 264-268. Jaillion P, Gardin ME, Lecocq B, Richard MO, Meignan S, Blondel Y, Grippat JC, Bergnieres J, and Vergnoux O (1989) Pharmacokinetics of nalbuphine in infants, young healthy volunteers, and elderly patients. Clin. Pharmacol. Ther. 46: 226-233
428	Nalmefene	55096-26-9	8.2	15	0.65	9.1	8.8	Frye RF, Matzke GR, Jallad NS, Wilhelm JA, Bikhazi GB (1996) The effect of age on the pharmacokinetics of the opioid antagonist nalmefene. Br. J. Clin. Pharmacol. 42: 301-306. Dixon R, Ghowes J, Gentile J, Hsu HB, Hsaio J, Garg D, Weidler D, Meyer M, and Tuttle R (1986) Nalmefene: inravenous safety and kinetics of a new opioid antagonist. Clin. Pharmacol. Ther. 39: 49-53. Frye RF, Matzke GR, Scha…
429	Naloxone	465-65-6	1.7	23	0.54	1.2	1.1	Ngai SH, Berkowitz BA, Yang JC, Hempstead J, and Spector S (1976) Pharmacokinetics of naloxone in rats and man: basis for its potency and short duration of action. Anesthesiology 44: 398-401. Asali LA and Brown KF (1984) Naloxone protein binding in adult and fetal plasma. Eur. J. Clin. Pharmacol. 27: 459-463.	Pharmacokinetic parameters were calculated from C vs t data obtained by digitization of the plot provided in the reference.
430	Naltrexone	16590-41-3	7.6	57	0.79	2.2	1.9	Wall ME, Brine DR, and Perez-Reyes M (1981) Metabolism and disposition of naltrexone in man after oral and intravenous administration. Drug Metab. Dispos. 9: 369-375. Ludden TM, Malspeis L, Baggot JD, Sokoloski TD, Frank SG, and Reuning RH (1976) Tritiated naltrexone binding in plasma from several species and tissue distribution in mice. J. Pharm. Sci. 65: 712-716	Calculated from C vs t data provided in the report.
431	Napsagatran	154397-77-0	0.36	6.4	NF	0.94	1.9	Hauptmann J. (2002) Pharmacokinetics of an emerging new class of anticoagulant/antithrombotic drugs A review of small-molecule thrombin inhibitors. Eur J Clin Pharmacol 57: 751-758.
432	Naratriptan	121679-13-8	2.4	6.6	0.7	6.1	6.6	Amerge Product Label.
433	Nateglinide	105816-04-4	0.15	1.8	0.029	1.4	1.5	Weaver ML, Orwig BA, Rodriguez LC, Graham ED, Chin JA, Shapiro MJ, Mcleod JF, and Mangold JB (2001) Pharmacokinetics and metabolism of nateglinide in humans. Drug Metab. Dispos. 29: 415-421. Choudhury S, Hirschberg Y, Filipek R, Lasseter K, and McLeod JF (2000) Single-dose pharmacokinetics of nateglinide in subjects with hepatic cirrhosis. J. Clin. Pharmacol. 40: 634-640.
434	Nebivolol	118457-14-0	11	14	NF	13	10	Cheymol G, Poirier JM, Carrupt PA, Testa B, Weissenburger J, Levron JC, and Snoeck E (1997) Pharmacokinetics of .beta.-adrenoceptor blockers in obese and normal volunteers. Br. J. Clin. Pharmacol. 43: 563-570.
435	Nefazodone	83366-66-9	0.51	7.5	0.01	1.1	1.2	Barbhaiya RH, Dandekar KA, and Greene DS (1996) Pharmacokinetics, absolute bioavailability, and disposition of [14C]nefazodone in humans. Drug Metab. Dispos. 24: 91-5. PPB data from http://www.drugs.com/ppa/nefazodone_hydrochloride.html
436	Nefopam	13669-70-0	5.6	12	NF	8.1	5	Chawla J, Le Guern ME, Alquier C, Kalhorn TF, and Levy RH (2005) Effect of route of administration on the pharmacokinetic behavior of enantiomers of nefopam and desmethylnefopam. Ther. Drug Monit. 25: 203-210.	VDss calculated from digitized C vs t data for (+) enantiomer.
437	Nelarabine	121032-29-9	4.9	81	0.8	1	0.5	Arranon Product Label.
438	Neostigmine	59-99-4	0.74	9.2	NF	1.3	1.3	Morris RB, Cronnelly R, Miller RD, Stanski DR, and Fahey MR (1981) Pharmacokinetics of edrophonium and neostigmine when antagonizing d-tubocurarine neuromuscular blockade in man. Anesthesiol. 54: 399-402.
439	Netilmicin	56391-56-1	0.073	0.55	1	2.2	3.2	Welling PG, Baumueller A, Lau CC, and Madsen PO (1977) Netilmicin Pharmacokinetics After Single Intravenous Doses to Elderly Male Patients. Antimic. Agents Chemother. 12: 328-334. Contrepois A, Brion N, Garaud JJ, Faurisson F, Delatour F, Levy JC, Deybach JC, and Carbon C (1985) Renal disposition of gentamicin, dibekacin, tobramycin, netilmicin, and amikacin in humans. Antimic. Agents Chemother. …	Used data from group 1 (mean age 54 yr) and analyzed C vs t data provided in the reference by Welling et al.
440	Nevirapine	129618-40-2	1.3	0.3	0.32	81	53	Lamson MJ, Sabo JP, MacGregor TR, Pav JW, Rowland L, Hawi A, Cappola M, and Robinson P (1999) Single dose pharmacokinetics and bioavailability of nevirapine in healthy volunteers. Biopharm. Drug Dispos. 20: 285-291. Almond LM, Boffito M, Hoggard PG, Bonora S, Raiteri R, Reynolds HE, Garazzino S, Sinicco A, Khoo SH, Back DJ, and Di Perri G (2004) The Relationship between Nevirapine Plasma Concentr…
441	Nicardipine	55985-32-5	1	11	0.01	1.5	4.1	Guerret M, Cheymol G, Hubert M, Julien-Larose C, and Lavene D (1989) Simultaneous study of the pharmacokinetics of intravenous and oral nicardipine using a stable isotope. Eur. J.Clin. Pharmacol. 37: 381-385. Kirsten R, Nelson K, Kirsten D, and Heintz B (1998) Clinical pharmacokinetics of vasodilators. Part I. Clin. Pharmacokinet. 34: 457-482.
442	Nicotine	54-11-5	2.6	18	0.95	2.4	2	Benowitz NL, Jacob P, Jones RT, and Rosenberg J (1982) Interindividual variability in the metabolism and cardiovascular effects of nicotine in man. J. Pharmacol. Exp. Ther. 221: 368-372.
443	Nifedipine	21829-25-4	0.79	7.3	0.044	1.8	1.9	Rashid TJ, Martin U, Clarke H, Waller DG, Renwick AG, and George CF (1995) Factors affecting the absolute bioavailability of nifedipine. Br. J. Clin. Pharmacol. 40: 51-58. Robertson DRC, Waller DG, Renwick AG, and George CF (1988) Age-related changes in the pharmacokinetics and pharmacodynamics of nifedipine. Br. J. Clin. Pharmacol. 25: 297-305. Kleinbloesem CH, van Harten J, Wilson JPH, Danhof M…
444	Nimodipine	66085-59-4	1.1	15	0.016	1.2	1.3	Muck W, Breuel HP, and Kuhlmann J (1996) The influence of age on the pharmacokinetics of nimodipine. Int. J. Clin. Pharmacol. Ther. 34: 293-298. Ramsch KD, Graefe KH, Scherline D, Sommer J, and Ziegler R (1986) Pharmacokinetics and metabolism of calcium-blocking agents nifedipine, nitrendipine, and nimodipine. Am. J. Nephrol. 6(Suppl 1): 73-80. Hynymen M, Siltanen T, Sahlman A, Pohjasvaara T, Muc…
445	Nisoldipine	63675-72-9	5.5	15	0.003	6.5	11	van Harten J, van Brummelen P, Lodewijks MTM, Danhof M, Breimer DD (1988) Pharmacokinetics and hemodynamic effects of nisoldipine and its interaction with cimetidine. Clin. Pharmacol. Ther. 43: 332-341. van Harten J, van Brummelen P, Wilson JHP, Lodewijks MTM, and Breimer DD (1988) Nisoldipine: kinetics and effects on blood pressure and heart rate in patients with liver cirrhosis after intravenou…
446	Nitrazepam	146-22-5	1.7	0.86	0.13	33	26	Jochemsen R, VanBeusekom BR, Spoelstra P, Janssens AR, and Breimer DD (1983) Effect of age and liver cirrhosis on the pharmacokinetics of nitrazepam. Br. J. Clin. Pharmacol. 15: 295-302. Jochemsen R, Hogendoorn JJH, Dingemanse J, Hermans J, Boeijinga JK, and Breimer DD (1982) Pharmacokinetics and bioavailability of intravenous, oral, and rectal nitrazepam in humans. J. Pharmacokinet. Biopharm. 10…	VDss calculated using C vs t data obtained by digitization of the plot provided in the references.
447	Nitrendipine	39562-70-4	6.1	25	0.02	4.1	8.2	Mikus G, Fischer C, Heuer B, Langen C, and Eichelbaum M (1987) Application of stable isotope methodology to study the pharmacokinetics, bioavailability, and metabolism of nitrendipine after i.v. and p.o. administration. Br. J. Clin. Pharmacol. 24: 561-569. Soons PA, DeBoer AG, Van Brummelen P, and Breimer DD (1989) Oral absorption ptrofile of nitrendipine in healthy subjects: a kinetic and dynami…
448	Nitrofurantoin	67-20-9	0.57	9.7	0.17	0.98	0.97	Hoener BA and Patterson SE (1981) Nitrofurantoin disposition. Clin. Pharmacol. Ther. 29: 808-816. Kurz H, Mauser-Ganshorn A, and Stickel HH (1977) Differences in the binding of drugs to plasma proteins from newborn and adult man. I. Eur. J. Clin. Pharmacol. 11: 463-467. Mannisto PT and Lamminsivu U (1982) Nitrofurantoin is highly bound to plasma protein. J. Antimic. Chemother. 9: 327-328.
449	Nizatidine	76963-41-2	1	9.8	0.65	1.7	1.5	Aronoff GR, Bergstrom RF, Bopp RJ, Sloan RS, and Callaghan JT, (1988) Nizatidine disposition in subjects with normal and imparired renal function. Clin. Pharmacol. Ther. 43: 688-695. Knadler MP, Bergestrom RF, Callaghan JT, and Rubin A (1986) Nizatidine, an H2-blocker. Its metabolism and disposition in man. Drug Metab. Dispos. 14: 175-82	VDss calculated using C vs t data obtained by digitization of the plot provided in the reference.
450	NK 611	105760-98-3	0.3	0.4	0.013	17	14	Mross K, Huettmann A, Herbst K, Hanauske AR, Schilling T, Manegold C, Burk K, and Hossfeld DK (1996) Pharmacokinetics and pharmacodynamics of the new podophyllotoxin derivative NK 611: A study by the AIO groups PHASE-I and APOH. Cancer Chemother. Pharmacol. 38: 217-224. Rassmann I., Thodtmann R, Mross M, Huttmann A, Berdel WE, Manegold C, Fiebig HH, Kaeser-Frohlich A, Burk K, and Hanauske AR (199…
451	Nomifensine	24526-64-5	6	22	0.4	4.5	6.5	Lindberg RLP, Syvalahti EKG, and Pihlajamaki KK (1986) Disposition of nomifensine after acute and prolonged dosing. Clin. Pharmacol. Ther. 39: 384-388. Heptner W, Hornke I, Cavagna F, Fehlhaber HW, Rupp W, and Neubauer HP (1978) Metabolism of nomifensine in man and animal species. Arz. Forsch. 28: 58-64	VDss calculated from data obtained by digitization of a plot in the reference.
452	Nortilidine	38677-94-0	2.5	9.9	NF	4.2	4.4	Hajda JP, Jahnchen E, Oie S, and Trenk D (2002) Sequential first-pass metabolism of nortilidine: the active metabolite of the synthetic opioid drug tilidine. J. Clin. Pharmacol. 42: 1257-1261.	VDss calculated from data obtained by digitization of a plot in the reference.
453	Nortriptyline	72-69-5	22	10	0.12	37	30	Overo KF, Gram LF, and Hansen V (1977) Interaction of perphenazine with the kinetics of nortriptyline. Acta Pharmacol. Toxicol. 40: 97-105. Nyberg G and Maartensson E (1984) Determination of free fractions of tricyclic antidepressants. Naunyn-Sch. Arch. Pharmacol. 327: 260-265.	VDss values were calculated for three of the subjects in the paper by Overo, et al, by digitizing the C vs t plots presented in the reference, and analyzing the resulting C vs t data.
454	Ofloxacin	82419-36-1	1.6	2.5	0.75	11	8.9	Gascon AR, Campo, E, Hernandez RM, Calvo B, Errasti J, and Pedraz JL (1998) Pharmacokinetics and tissue distribution of intravenous ofloxacin for antibiotic prophylaxis in biliary surgery. Clin. Drug Invest. 15: 491-496. Bergogne-Berezin E (2002) Clinical role of protein binding of quinolones. Clin. Pharmacokinet. 41: 741-750.
455	Olcegepant	204697-65-4	0.31	2.6	NF	1.9	2.5	Iovino M, Feifel U, Yong CL, Wolters JM, and Wallenstein G (2004) Safety, tolerability and pharmacokinetics of BIBN 4096 BS, the first selective small molecule calcitonin gene-related peptide receptor antagonist, following single intravenous administration in healthy volunteers. Cephalalgia 24: 645-56.
456	Olsalazine	15722-48-2	0.07	1.2	NF	0.97	0.9	Ryde EM and Ahnfelt NO (1988) The pharmacokinetics of olsalazine sodium in healthy volunteers after a single i.v. dose and after oral doses with and without food. Eur. J. Clin. Pharmacol. 34: 481-488.
457	Omeprazole	73590-58-6	0.24	8.4	0.05	0.48	0.58	Regardh CG, Andersson T, Lagerstrom PO, Lundborg P, and Skanberg I (1990) The pharmacokinetics of omeprazole in humans-a study of single intravenous and oral doses. Ther. Drug Monit. 12: 163-172. Regardh CG, Gabrielsson M, Hoffman KJ, Lofberg I, and Skanberg I (1985) Pharmacokinetics and metabolism of omeprazole in animals and man--an overview. Scand. J Gastroent.108(Suppl): 79-94.	CL and t1/2 values were reported as medians.
458	Ondansetron	99614-02-5	1.8	5.8	0.27	5.2	3.4	Pritchard JF, Bryson JC, Kernodle AE, Benedetti TL, and Powell JR (1992) Age and gender effects on ondansetron pharmacokinetics: evaluation of healthy aged volunteers. Clin. Pharmacol. Ther. 51: 51-55.. Zofran Product Label.
459	Oseltamivir acid	187227-45-8	0.37	4.8	0.97	1.3	1.8	He G, Massarella J, and Ward P (1999) Clinical pharmacokinetics of the progrug oseltamivir and its active metabolite Ro 64-0802. Clin. Pharmacokinet. 37: 471-484.
460	Oxacillin	66-79-5	0.19	6.3	0.07	0.5	0.7	Dittert LW, Griffen WO, LaPiana JC, Shainfeld FJ, and Doluisio JT (1969) Pharmacokinetic interpretation of penicillin levels in serum and urine after intravenous administration. Antimic. Agents Chemother. 42-48. Bergan T (1984) Pharmacokinetics of beta-lactam antibiotics. Scand. J. Infect. Dis. 42(Suppl): 83-98.	VDss calculated using micro rate constants reported in the reference by Dittert, et al. Concentrations determined using a bioassay.
461	Oxazepam	604-75-1	0.59	1.1	0.04	8.9	6.7	Sonne J, Loft S, Dossing M, Vollmer-Larsen A, Olesen KL, Victor M, Andreasen F, and Andreasen PB (1988) Bioavailability and pharmacokinetics of oxazepam. Eur. J. Clin. Pharmacol. 35: 385-389. Lucek RW and Coutinho CB (1976) The role of substituents in the hydrophobic binding of the 1,4-benzodiazepines by human plasma proteins. Molec. Pharmacol. 12: 612-619. Desmond PV, Roberts RK,, Wood AJJ, Dunn…
462	Oxiracetam	62613-82-5	0.55	1.8	NF	4.9	7.5	Perucca E, Albrici A, Gatti G, Spalluto R, Visconti M, and Crema A (1984) Pharmacokinetics of oxiracetam following intravenous and oral administration in healthy volunteers. Eur. J. Drug Metab. Pharmacokinet. 3: 267-274.
463	Oxybutynin	5633-20-5	0.85	5.1	0.0034	2.7	7.2	Douchamps J, Derenne F, Stockis A, Gangji D, Juvent M, and Herchuelz A (1988) The pharmacokinetics of oxybutynin in man. Eur. J. Clin. Pharmacol. 35: 515-520. Mizushima H, Takanaka K, Abe K, Fukazawa I, and Ishizuka H (2007) Stereoselective pharmacokinetics of oxynutynin and N-desethyloxybutynin in vitro and in vivo. Xenobiotica 37: 59-73.	Parameters calculated from C vs t data obtained by digitization of the plot provided in the reference. Used data from 1 mg dose.
464	Oxycodone	76-42-6	2.5	6.1	0.55	6.8	5.5	Leow KP, Smith MT, Watt JA, Williams BE, and Cramond T (1992) Comparative oxycodone pharmacokinetics in humans after intravenous, oral, and rectal administration. Ther. Drug Monit. 14: 479-484. Leow KP, Wright AWE, Cramond T, and Smith MT (1993) Determination of the serum protein binding of oxycodone and morphine using ultrafiltration. Ther. Drug Monit. 15: 440-447.
465	Oxytetracycline	79-57-2	1.7	2	0.9	12	10	Kunin CM, Darnbush AC, and Finland M (1959) Distribution and excretion of four tetracycline analogs in normal young men. J. Clin. Invest. 38 1950-1963.	calculated from digitized plots
466	Paclitaxel	33069-62-4	3	6.4	0.12	7.8	11	Sonnichsen DS and Relling MV (1994) Clinical pharmacokinetics of paclitaxel. Clin. Pharmacokinet. 27: 256-269.	Averaged values listed in Table 1 of Sonnichsen and Relling. For t1/2 values, used longest value reported in each reference.
467	Palonosetron	135729-61-2	6.3	2.6	0.38	40	39	Stoltz R, Cyong JC, Shah A, and Parisi S (2004) Pharmacokinetic and safety evaluation of palonosetron, a 5-hydroxytryptamine-3 receptor antagonist, in U.S. and Japanese healthy subjects. J. Clin. Pharmacol. 44: 520-531. Siddiqui M, Asif A, and Scott LJ.(2004) Palonosetron. Drugs 64: 1125-1132.	VDss was calculated from C vs t data obtained by digitization of the plot provided in the reference.
468	Pamidronic acid (Pamidronate)	40391-99-9	1.8	2.5	NF	12	32	Berenson JR, Rosen L, Vescio R, Lau HS, Woo M, Sioufi A, Kowalski MO, Knight RD, and Seaman JJ (1997) Pharmacokinetics of pamidronate disodium in patients with cancer with normal or impaired renal function. J. Clin. Pharmacol. 37: 285-290.	Pharmacokinetic parameters were calculated from C vs t data obtained by digitization of the plot provided in the reference.
469	Pancuronium	15500-66-0	0.2	1.5	0.09	2.2	1.9	Caldwell JE, Castagnoli KP, Canfell PC, Fahey MR, Lynam DP, Fisher DM, and Miller RD (1988) Pipecuronium and pancuronium: comparison of pharmacokinetics and duration of action. Br. J. Anaesth. 61: 693-697. Wood M, Stone WJ, and Wood AJJ (1983) Plasma binding of pancuronium: effects of age, sex, and disease. Anesth. Analg. 62: 29-32
470	Panipenem	87726-17-8	0.19	2.6	NF	1.2	0.96	Saito A (1991) Pharmacokinetics of panipenem/betamipron. Chemotherapy 39(Suppl. 3)4: 227-235.	VDss calculated from C vs t data provided in the reference.
471	Pantoprazole	102625-70-7	0.17	2.2	0.02	1.9	1.9	Pue MA, Laroche J, Meineke I, and deMey C (1993) Pharmacokinetics of pantoprazole following single intravenous and oral administration to healthy male subjects. Eur. J. Clin. Pharmacol. 44: 575-578. Huber R; Hartmann M; Bliesath H; Luhmann R; Steinijans V W; Zech K Pharmacokinetics of pantoprazole in man. International journal of clinical pharmacology and therapeutics (1996), 34(1 Suppl), S7-16
472	Papaverine	58-74-2	0.95	11	0.073	1.4	1.8	Garrett ER, Roseboom H, Green JR, and Schuermann W (1978) Pharmacokinetics of papaverine hydrochloride and the biopharmaceutics of its oral dosage forms. Int. J. Clin. Pharmacol. Biopharm. 16: 193-208. Berg G, Jonsson KA, Hammar M, and Norlander B (1988) Variable bioavailability of papaverine. Pharmacol. Toxicol. 62: 308-310.	Parameters calculated from C vs t data obtained by digitization of the plots reported in Garrett, et al and averaged for two dose levels. VDss was obtained by digitization of the plot in Berg, et al.. All data were averaged together weighted for the number of subjects in each study.
473	Paricalcitol	131918-61-1	0.41	0.89	0.0016	7.7	5.3	Carr RA, Andre AK, Chen P, Grabowski BA, Chang MS, Locke CS, Williams LA, and Chojkier M (2006) The effect of hepatic insufficiency on the safety and pharmacokinetics of paricalcitol (ZemplarR). Nephron 103: c100-c105.	Free fraction calculated by comparing free and total AUC values reported in the reference.
474	Paroxetine	61869-08-7	18	18	0.06	17	13	Lund J, Thayssen P, Mengel H, Pedersen OI, Kristensen CB, and Gram LF (1982) Paroxetine: pharmacokinetics and cardiovascular effects after oral and intravenous single doses in man. Acta Pharmacol. Toxicol. 51: 351-357. Paxil Product Label.	VDss was calculated from micro rate constants reported in the reference.
475	Pefloxacin	70458-92-3	1.5	2	0.75	13	11	Frydman AM, Le Roux Y, Lefebvre MA, Djebbar F, Fourtillan JB, and Gaillot J (1986) Pharmacokinetics of perfloxacin after repeated intravenous and oral administration (400mg bid) in young healthy volunteers. J. Antimic. Chemother. 17(Suppl B): 65-79. Bergogne-Berezin E (2002) Clinical role of protein binding of quinolones. Clin. Pharmacokinet.41: 741-750.	Pharmacokinetic parameters were calculated from C vs t data obtained by digitization of the plot provided in the reference.
476	Penciclovir	39809-25-1	1.1	8.4	0.84	2.4	2.1	Fowles SF, Pierce DM, Prince WT, and Staniforth D (1992) The tolerance to and pharmacokinetics of penciclovir (BRL 39123A), a novel antiherpes agent, administered by intravenous infusion to healthy subjects. Eur. J. Clin. Pharmacol. 43: 513-516. Filer CW, Allen GD, Brown TA, Fowles SE, Hollis FJ, Mort EE, Prince WT, and Ramji JV (1994) Metabolic and pharmacokinetic studies following oral administ…	Parameters calculated from digitized plots and averaged over all dose levels.
477	Penicillin G	61-33-6	0.24	6.9	0.4	0.58	0.7	Dittert LW, Griffen WO, LaPiana JC, Shainfeld FJ, and Doluisio JT (1969) Pharmacokinetic interpretation of penicillin levels in serum and urine after intravenous administration. Antimic. Agents Chemother. 42-48. Malerczyk VV, Ruegenberg W, Seiler KU, and Simon C (1979) Untersuchungen zur konkurrenz verscheidener antibiotika um ihre bindungsstellen an serumeiweissen. Arzneim. Forsch. 29: 169-171.	VDss calculated using micro rate constants reported in the reference by Dittert, et al. Concentrations determined using a bioassay.
478	Pentamidine	100-33-4	53	74	NF	12	25	Conte JE, Duncan S, McKenna E, and Zurlinden E (1999) Effect of gender and race on the pharmacokinetics of pentamidine in HIV-infected patients. Clin, Drug Invest. 17: 293-299.
479	Pentazocine	359-83-1	3.4	23	0.39	2.5	2.5	Ritschel WA, Bykadi G, Hoffmann KA, Norman EJ, Lucker PJ, and Rindt W (1982) Disposition and clinical side effectsof pentazocine when administered day and night. Arz. Forsch. 32: 64-68. Ritschel WA, Hoffmann KA, Willig JL, Frederick KA, and Wetzelberger N (1986) The effect of age on the pharmacokinetics of pentazocine. Meth. Find. Expt. Clin. Pharmacol. 8: 497-503. Ehrnebo M, Agurell S, Boreus LO…
480	Pentobarbital	76-74-4	0.91	0.47	0.39	32	22	Ehrenbo M (1974) Pharmacokinetics and distribution properties of pentobarbital in humans following oral and intravenous administration. J. Pharm. Sci. 63: 1114-1118. Bayliff CD, Schwartz ML, and Hardy BG (1985) Pharmacokinetics of high-dose pentobarbital in severe head trauma. Clin. Pharmacol. Ther. 38: 457-461. Ehrnebo M and Odar-Cederlof I (1975) Binding of amobarbital, pentobarbital and diphen…	VDss calculated using micro rate constants reported in the reference by Ehrenbo.
481	Pentoxifylline	6493-05-6	1.8	39	NF	0.77	1.2	Beermann B, Ings R, Mansby J, Chamberlain J, and McDonald A (1985) Kinetics of intravenous and oral pentoxifylline in healthy subjects. Clin. Pharmacol. Ther. 37: 25-28. Rames A, Poirier JM, LeCoz F, Midavaine M, Lecocq B, Grange JD, Poupon R, Cheymol G, and Jaillon P (1990) Pharmacokinetics of intravenous and oral pentoxifylline in healthy volunteers and in cirrhotic patients. Clin. Pharmacol. T…	Calculated VDss from C vs t data obtained by digitization of plots included in the references.
482	Perindoprilat	95153-31-4	0.76	1.7	0.16	7.6	29	Devissaguet JP, Ammoury N, Devissaguet M, and Perret L (1990) Pharmacokinetics of perindopril and its metabolites in healthy volunteers. Fundam. Clin. Pharmacol. 4: 175-189. Parker E, Aarons L, Rowland M, and Resplandy G (2005) The pharmacokinetics of perindoprilat in normal volunteers and patients: Influence of age and disease state. Eur. J. Pharm. Sci. 26: 104-113.	VDss calculated from data obtained by digitization of a plot in the reference.
483	Perphenazine	58-39-9	18	27	0.07	11	9.4	Eggert Hansen C, Rosted CT, Elley J, Bolvig Hansen L, Kragh-Sorensen P, Larsen NE, Naestoft J, and Hvidberg (1976) Clinical pharmacokinetics studies of perphenazine. Br. J. Clin. Pharmacol. 3: 915-923. Verbeek RK, Cardinal JA, Hill AG, and Midha KK (1983) Binding of phenothiazine neuroleptics to plasma proteins. Biochem. Pharmacol. 32: 2565-2570.	VDss was determined from C vs t data obtained by digitization of the plots presented in the reference.
484	Phenacetin	62-44-2	1.4	21	0.47	1.1	0.92	Raaflaub J and Dubach UC (1975) On the pharmacokinetics of phenacetin in man. Eur. J. Clin. Pharmacol. 8: 261-265. Kurz H, Mauser-Ganshorn A, and Stickel HH (1977) Differences in the binding of drugs to plasma proteins from newborn and adult man. I. Eur. J. Clin. Pharmacol. 11: 463-467.	VDss data calculated from C vs t data reported in the paper. Values are for whole blood.
485	Phencyclidine	77-10-1	6.9	5.1	0.35	23	16	Cook CE, Brine DR, Jeffcoat AR, Hill JM, Wall ME, Perez-Reyes M, and Di Guiseppi SR (1982) Phencyclidine disposition after intravenous and oral doses. Clin. Pharmacol. Ther. 31: 625-634.	VDss obtained from C vs t data obtained by digitization of the plot provided in the reference.
486	Phenethicillin	147-55-7	0.3	4.2	0.25	1.2	0.91	Overbosch D, Mattie H, and van Furth R (1985) Comparative pharmacodynamics and clinical pharmacokinetics of phenoxymethylpenicillin and pheneticillin. Br. J. Clin. Pharmacol. 19: 657-668. Bergan T (1984) Pharmacokinetics of beta-lactam antibiotics. Scand. J. Infect. Dis. 42(Suppl): 83-98.	VDss calculated from reported rate micro-constants
487	Phenobarbital	50-06-6	0.54	0.063	0.49	140	99	Wilensky AJ, Friel PN, Levy RH, Confort CP, and Kaluzny SP (1982) Kinetics of phenobarbital in normal subjects an epileptic patients. Eur. J. Clin. Pharmacol. 23: 87-92. Kurz H, Mauser-Ganshorn A, and Stickel HH (1977) Differences in the binding of drugs to plasma proteins from newborn and adult man. I. Eur. J. Clin. Pharmacol. 11: 463-467.
488	Phenoxymethylpenicillin	87-08-1	0.41	6.8	0.45	1	0.84	Overbosch D, Mattie H, and van Furth R (1985) Comparative pharmacodynamics and clinical pharmacokinetics of phenoxymethylpenicillin and pheneticillin. Br. J. Clin. Pharmacol. 19: 657-668. Bergan T (1984) Pharmacokinetics of beta-lactam antibiotics. Scand. J. Infect. Dis. 42(Suppl): 83-98.	VDss calculated from reported rate micro-constants
489	Pimobendan	74150-27-9	2.04	14	0.024	2.2	1.8	Chu KM, Shieh SM, and Hu OYP (1995) Plasma and red blood cell pharmacokinetics of pimobendan enantiomers in healthy Chinese. Eur. J. Clin. Pharmacol. 47: 537-542.	Data from enantiomers averaged.
490	Pindolol	13523-86-9	1.2	7.7	0.58	2.6	2.2	Lavene D, Weiss YA, Safar ME, Loria Y, Agorus H, Georges D, and Milliez PL (1977) Pharmacokinetics and hepatic extraction ratio of pindolol in hypertensive patients with normal and impaired renal function. J. Clin. Pharmacol. 17: 501-508. Henry JA and Mitchell SN (1981) Effect of pH on human plasma protein binding of a series of .beta.-adrenoceptor antagonists. Br. J. Clin. pharmacol. 11: 119P-12…	VDss calcualted from reported micro rate constants.
491	Piperacillin	61477-96-1	0.27	4	0.5	1.1	0.96	De Schepper PJ, Tjandramaga TB, Mullie A, Verbesselt R, van Hecken A, Verberckmoes R, and Verbist L (1982) Comparative pharmacokinetics of piperacillin in normals and in patients with renal failure. J. Antimic. Chemother. 9(Suppl B) 49-57. Tjandramaga TB, Mullie A, Verbesselt R, De Schepper PJ, and Verbist L (1978) Piperacillin: human pharmacokinetics after intravenous and intramuscular administr…
492	Pipercuronium	68399-58-6	0.35	3	0.98	1.9	1.9	D'Honneur G, Khalil M, Dominique C, Haberer JP, Kleef UW, and Duvaldestin P (1993) Pharmacokinetics and pharmacodynamics of pipercuronium in patients with cirrhosis. Anesth. Analg. 77: 1203-1206. Szeleczky G, Ronai-Lukacs S, and Vereczkey L (1984) Protein-binding of pipecuronium bromide (Arduan) in human plasma. Stud. Org. Chem. 18: 251-254.
493	Piretanide	55837-27-9	0.17	3.1	0.058	0.91	1.3	Trenk D, Wagner F, Jaehnchen E, Spahn H, and Mutschler E (1987) Pharmacokinetics and bioavailability of piretanide in healthy volunteers following intramuscular administration. Arz.Forsch. 37: 1382-1385. Elliott HL, Ansari AF, Campbell BC, and Lawrence JR (1982) Protein binding of piretanide in normal and uremic serum. Eur. J. Clin. Pharmacol. 21: 311-313.
494	Piritramide	302-41-0	4.7	7.8	0.061	10	8	Keitzmann D, Briede I, Bouillon T, Gundert-Remy U, and Kettler D (1996) Pharmacokinetics of piritramide after and intravenous bolus in surgical patients. Acta Anaesthesiol. Scand. 40: 898-903.
495	Pirmenol	68252-19-7	1.4	1.8	0.13	13	8.4	Hammill SC, Shand DG, Routledge PA. Hindman MC, Baker JT, and Pritchett ELC (1982) Pirmenol, a new antiarrhythmic agent: initial study of efficacy, safety and pharmacokinetics. Circulation 65: 369-375,	VDss calculated from reported rate microcnstants.
496	PNU-145156E	154788-16-6	0.27	0.00469571	NF	960	730	Groen HJM, deVries EGE, Wynendaele W, van der Graaf WTA, Fokkema W, Lechuga MJ, Poggesi T, Dirix LY, and van Oosterom AT (2001) PNU-145156E, a novel angiogenesis inhibitor, in patients with solid tumors: a phase I and pharmacokinetic study. Clin. Canc. Res. 7: 3928-3933.	VDss calculated from digitized plot of 200 mg/m2 dose.
497	Pravastatin (acid)	81093-37-0	0.46	14	0.5	0.59	0.78	Singhvi SM, Pan HY, Morrison RA, and Willard DA (1990) Dispositon of pravastatin sodium, a tissue-selective HMG-CoA reductase inhibitor, in healthy subjects. Br. J. Clin. Pharmacol. 29: 239-243. Quion JA and Jones PH (1994) Clinical pharmacokinetics of pravastatin. Clin. Pharmacokinet. 27: 94-103.
498	Prazosin	19216-56-9	0.73	4.7	0.06	2.6	2	Meredith PA, Elliott HL, Kelman AW, and Reid JL (1985) Application of pharmacokinetic-pharmacodynamic modelling for the comparison of quinazoline alpha-adrenoreceptor agonists in normotensive volunteers. J. Cardiovasc. Pharmacol. 7: 532-537. Vanholder R, Van Landschoot N, De Smet R, Schoots A, and Ringoir S (1988) Drug protein binding in chronic renal failure: evaluation of nine drugs. Kidney Int…
499	Prednisolone	50-24-8	0.86	2.9	0.25	4.8	3.4	Rose JQ, Yurchak AM, Meikle AW, and Jusko WJ (1981) Effect of smoking on prednisone, prednisolone, and dexamethasone pharmacokinetics. J. Pharmacokinet. Biopharm. 9: 1-14.	Note: prednisolone demonstrates complex dose-dependent PK (Frey BM and Fey FJ (1990) Clinical pharmacokinetics of prednisone and prednisolone. Clin. Pharmacokinet. 19: 126-146.
500	Prednisone	53-03-2	0.57	2.5	0.27	3.8	2.9	Georgitis JW, Flesher KA, and Szefler SJ (1982) Bioavailability assessment of a liquid prednisone preparation. J. Allerg. Clin. Immunol. 70: 243-247. Ferry JJ and Wagner JG (1987) The nonlinear pharmacokinetics of prednisone and prednisolone. II. Plasma protein binding of prednisone and prednsolone in rabbit and human plasma. Biopharm. Drug Dispos. 8: 261-272.	Calculated parameters from C vs t data provided in the reference.
501	Prilocaine	721-50-6	3.7	29	0.72	2.2	1.8	van der Meer AD, Blum AGL, Stienstra R, van Kleef JW, Vletter AA, and Olieman W (1999) Pharmacokinetics of prilocaine after intravenous administration in volunteers: enantioselectivity. Aneasthesiol. 90: 988-992.	Data for individual stereoisomers were averaged.
502	Primaquine	90-34-6	4	5.8	NF	11	7.1	Mihaly GW, Ward SA, Edwards G, Nicholl DD, Orme MLE, and Breckenrodge AM (1985) Pharmacokinetics of primaquine in man. I. Studies of the absolute bioavailability and effects of dose size. Br. J. Clin. Pharmacol. 19: 745-750.	VDss calculated from digitized C vs t plot.
503	Probenecid	57-66-9	0.13	0.25	0.13	8.7	5.9	Kartzinel R, Ebert MH, and Chase TN (1976) Intravenous probenecid loading. Effect on plasma and cerebrospinal fluid probenecid levels and on monoamine metabolites in cerebrospinal fluid. Neurology 26: 992-996. Emanuelsson BM, Beermann B, and Paalzow LK (1987) Non-linear elimination and protein binding of probenecid. Eur. J. Clin. Pharmacol. 32: 395-401.	Parameters were determined using C vs t data obtained by digitization of the plot provided in the reference. Protein binding is saturable; the value at half maximum is reported.
504	Procainamide	51-06-9	2.2	10	0.84	3.7	3.1	Christoff PB, Conti DR, Naylor C, and Jusko WJ (1983) Procainamide disposition in obesity. Drug Intell. Clin. Pharm. 17: 516-522. Reidenberg MM, Drayer DE, Levy M, and Warner H (1975) Polymorphic acetylation of procainamide in man. Clin. Pharmacol. Ther. 17: 722-730
505	Prochlorperazine	58-38-8	22	16	NF	23	9	Taylor WB and Bateman DN (1987) Preliminary studies of the pharmacokinetics and pharmacodynamics of prochlorperazine in healthy volunteers. Br. J. Clin. Pharmacol. 23: 137-142.	VDss was determined using C vs t data obtained by digitization of the plot provided in the reference.
506	Procyclidine	77-37-2	0.74	0.86	NF	14	12	Whiteman PD, Fowle ASE, Hamilton MJ, Peck AW, Bye A, dean K, and Webster A (1985) Pharmacokinetics and pharmacodynamics of procyclidine in man. Eur. J. Clin. Pharmacol. 28: 73-78.	VDss calculated from digitized C vs t plot.
507	Promazine	58-40-2	8.1	14	0.11	9.6	7.9	Koytchev R, Alken RG, Kirkov V, Neshev G, Vagaday M, and Kunter U (1994) Absolute bioverfugbarkeit von chlorpromazin, promazin, und promethazin. Arz. Forsch. 44: 121-125. Hu OYP and Curry SH (1989) Stability, human blood distribution and rat tissue localization of promazine and desmonomethylpromazine. Biopharm. Drug Dispos. 10: 537-548.
508	Promethazine	60-87-7	14	14	0.09	17	14	Koytchev R, Alken RG, Kirkov V, Neshev G, Vagaday M, and Kunter U (1994) Absolute bioverfugbarkeit von chlorpromazin, promazin, und promethazin. Arz. Forsch. 44: 121-125. Quinn J and Calvert R (1976) The disposition of promethazine in man. J. Pharm. Pharmacol. 28(Suppl.) 59P. Hu OYP and Curry SH (1989) Stability, human blood distribution and rat tissue localization of promazine and desmonomethylp…
509	Propafenone	54063-53-5	2.2	16	0.038	2.2	2.1	Arboix M, Puigdemont A, Moya A, and Cinca J (1985) Pharmacokinetics of intravenous propafenone in patients with episodes of paroxysmal supraventricular tachycardia. Meth. Find. Exptl. Clin. Pharmacol. 7: 436-438. Hollmann M, Brode E, Hotz D, Kaumeier S, and Kerhahn OH (1983) Investigations on the pharmacokinetics of propafenone in man. Arzn. Forsch. 33: 763-770. Chan GLY, Axelson JE, Price JDE, M…	VDss calculated from analysis of the C vs t data provided in the reference by Arboix, et al and Hollmann et al..
510	Propofol	2078-54-8	4.7	36	0.016	2.2	3.2	Ibrahim A, Park S, Feldman J, Karim A, and Kharasch ED (2002) Effects of parecoxib, a parenteral COX-2-specific inhibitor, on the pharmacokinetics and pharmacodynamics of propofol. Anesthesiology 96: 88-95. Servin F, Desmonts JM, Haberer JP, Cockshott ID, Plummer GF, and Farinotti R (1988) Pharmacokinetics and protein binding of propofol in patients with cirrhosis. Anesthesiology 69: 887-891. Sha…
511	Propoxyphene	469-62-5	12	15	0.24	13.3333	18	Gram LF, Schmidt K, Christensen FN, and Schou J (1984) D-Propoxyphene kinetics in man: significance of a deep third compartment. Eur. J. Clin. Pharmacol. 26: 749-752. Giacomini KM, Gibson TP, and Levy G (1978) Plasma protein binding of d-propoxyphene in normal subjects and anephric patients. J. Clin. Pharmacol. 18: 106-109.	VDss calculated from exponential three-compartment coefficients reported in the reference.
512	Propranolol	525-66-6	3.1	12	0.13	4.3	3.4	Henry JA and Mitchell SN (1981) Effect of pH on human plasma protein binding of a series of .beta.-adrenoceptor antagonists. Br. J. Clin. Pharmacol. 11: 119P-120P. Cheymol G, Poirier JM, Carrupt PA, Testa B, Weissenburger J, Levron JC, and Snoeck E (1997) Pharmacokinetics of .beta.-adrenoceptor blockers in obese and normal volunteers. Br. J. Clin. Pharmacol. 43: 563-570.
513	Propylthiouracil	51-52-5	0.34	3.1	0.18	1.8	1.3	Kampmann J and Skovsted L (1974) Pharmacokinetics of propylthiouracil. Acta Pharmacol. Toxicol. 35: 361-369. Giles HG, Roberts EA, Orrego H, and Sellers EM (1981) Disposition of intravenous propylthiouracil. J. Clin. Pharmacol. 21: 466-471.	VDss calculated from reported rate microconstants.
514	Pseudohypericin	55954-61-5	0.56	0.62	NF	15	20	Kerb R, Brockmuller J, Staffeldt B, Ploch M, and Roots I (1996) Single dose and steady-state pharmacokinetics of hypericin and pseudohypericin. Antimic. Agents Chemother. 40: 2087-2093.
515	Pyridostigmine	155-97-5	1.1	9.6	1	1.8	1.5	Aquilonius SM, Eckernaes SA, Hartvig P, Lindstroem B, and Osterman PO (1980) Pharmacokinetics and oral bioavailability of pyridostigmine in man. Eur. J. Clin. Pharmacol. 18: 423-428. Kornfeld P, Samuels AJ, Wolf RL, and Osserman KE (1970) Metabolism of pyridostigmine-14C in myasthenia gravis. Evidence for multiple metabolites. Neurology 20: 634-641.	VDss calculated from C vs t data obtained by digitization of plots in the reference.
516	Pyrimethamine	58-14-0	0.43	0.052	0.095	140	140	Almond DS, Szwandt ISF, Edwards G, Lee MG, and Winstanley PA (2000) Disposition of intravenous pyrimethamine in healthy volunteers. Antimic. Ag. Chemother. 44: 1691-1693. Cavallito JC, Nichol CA, Brenckman WD, Deangelis RL, Stickney DR, Simmons WS, and Sigel CW (1978) Lipid-soluble inhibitors of dihydrofolate reductase. I. Kinetics, tissue distribution, and extent of metabolism of pyrimethamine, …	Note: Incorrect calculations in the original paper.
517	Quercetin	117-39-5	0.12	11	0.009	0.2	0.6	Ferry DR, Smith A, Malkhandi J, Fyfe DW,DeTakats PG, Anderson D, Baker J, Kerr DJ (1996) Phase I clinical trial of the flavonoid quercetin: Pharmacokinetics and evidence for in vivo tyrosine kinase inhibition. Clin. Cancer Res. 2: 659-668. Boulton DW, Walle UK, and Walle T (1998) Extensive binding of the bioflavonoid quercetin to human plasma proteins. J. Pharm. Pharmacol. 50: 243-249.
518	Quinacrine	83-89-6	45	5.1	0.13	150	120	Shannon JA, Earle DP, Brodie BB, Taggart JV, and Berliner RW (1944) The pharmacological basis for the rational use of atabrine in the treatment of malaria. J. Pharmacol. Exp. Ther. 81: 307-330.	Pharmacokinetic parameters were calculated from C vs t provided in the reference.
519	Quinaprilat	82768-85-2	0.13	0.93	0.32	2.3	2.3	Breslin E, Posvar E, Neub M, Trenk D, and Jahnchen E (1996) A pharmacodynamic and pharmacokinetic comparison of intravenous quinaprilat and oral quinapril. J. Clin. Pharmacol. 36: 414-421. Accuretic Product Label.	VDss calculated from C vs t data obtained by digitization of the plot provided in the reference.
520	Quinidine	56-54-2	2.9	4	0.26	12	6.6	Ueda CT, Williamson BJ, and Dzindzio BS (1976) Disposition kinetics of dihydroquinidine following quinidine administration. Res. Comm. Chem. Path. Pharmacol. 14: 215-225. Fremstad D, Nilson OG, Stirsein L, Amlie J, and Jacobson S (1979) Pharmacokinetics of quinidine related to protein binding in man. Eur. J. Clin. Pharmacol. 15: 187-192. Woo E and Greenblatt DJ (1979) Pharmacokinetic and clinical…
521	Quinine	130-95-0	1.8	1.9	0.3	16	11	White NJ, Clinical pharmacokinetics of antimaliria drugs. Clin. Pharmacokinet. 10: 187-215. White NJ, Chanthavanich P, Krishna S, Bunch C, and Silamut K (1983) Quinine disposition kinetics. Br. J. Clin. Pharmacol. 16: 399-403.	VDss calculated from reported rat micro-constants.
522	Quinupristin	120138-50-3	0.67	16	0.34	0.7	0.87	Chevalier P, Rey J, Pasquier O, Rouzier-Panis R, Harding N, and Montay G (2001) Multiple-dose pharmacokinetics and safety of two regimens of quinupristine/dalfopristin (Synercid) in healthy volunteers. J. Clin. Pharmacol. 41: 404-414. Bergeron M and Montay G (1997) The pharmacokinetics of quinupristin/dalfopristin in laboratory animals and in humans. J. Antimic. Chemother. 39(Supp. A): 129-138. B…
523	Rabeprazole	117976-89-3	0.22	4	0.037	0.92	1	Setoyama T, Laurent A, Humphries T, and Hasegawa J (2005) Pharmacokinetics of rabeprazole following single intravenous and oral administration to healthy subjects. Int. J. Clin. Pharmacol. Ther. 43: 37-42.	Pharmacokinetic parameters were calculated from C vs t data obtained by digitization of the plot provided in the reference.
524	Ranitidine	66357-35-5	1.2	9.6	0.95	2.1	2.1	Chau NP, Zech PY, Pozet N, and Hadj-Aissa A (1982) Ranitidine kinetics in normal subjects. Clin. Pharmacol. Ther. 31: 770-774. Van Hecken AM, Tjandramaga TB, Mullie A, Verbesselt R, and De Schepper PJ (1982) Ranitidine: single dose pharmacokinetics and absolute bioavailability in man. Br. J. Clin. Pharmacol. 14: 195-200. Smith IL, Ziemniak JA, Bernhard H, Eshelman FN, Martin LE, and Schentag JJ (…	VDss calculated from micro rate constants reported in the reference.
525	R-Apomorphine	58-00-4	1.6	40	0.057	0.67	0.68	Van Der Geest R, Van Laar T, Kruger PP, Gubbens-Stibbe JM, Bodde HE, Roos RAC, and Danhof M (1998) Pharmacokinetics, enantiomer interconversion, and metabolism of R-apomorphine in patients with idiopathic Parkinson's disease. Clin. Neuropharmacol. 21: 159-168. Smith RV, Velagapudi RB, McLean AM, and Wilcox RE (1985) Interactions of apomorphine with serum and tissue proteins. J. Med. Chem. 28: 613…
526	Reboxetine	71620-89-8	0.65	0.82	0.019	13	10	Fleishaker JC, Mucci M, Pellizzoni C, and Poggesi I (1999) Absolute bioavailability of reboxetine enantiomers and effect of gender of pharmacokinetics. Biopharm. Drug Dispos. 20: 53-57. Hendershot PE, Fleishaker JC, Lin KM, Nuccio ID, and Poland RE (2001) Pharmacokinetics of reboxetine in healthy volunteers with different ethnic descents. Psychopharmacology 155: 148-53.	Administered as a racemate; averaged data for the two enantiomers.
527	Recainam	74738-24-2	1.4	4.5	0.86	5.2	5	Anderson JL, Reddy P, Myerburg RJ, Waxman HL, and deVane PJ (1993) Antiarrhythmic and pharmacokinetic evaluation of intravenous recainam in patients with frequent ventricular premature complexes and unsustained ventricular tachycardia. Am. J. Cardiol. 71: 686-694. Scatina JA, Kimmel HB, Weinstein V, Troy SM, Sisenwine SF, and Cayen MN (1990) Species differences in the pharmacokinetics of recainam…
528	Remifentanil	132875-61-7	0.4	37	0.3	0.18	0.8	Egan TD, Lemmens HJM, Fiset P, Hermann DJ, Muir KT, Stanski DR, and Shafer SL (1993) The pharmacokinetics of the new short-acting opioid remifentanil (GI87084B) in healthy adult male volunteers. Anesthesiology 79: 881-892. Ultiva Product Label.	Terminal half-life was calculated from a population pharmacokinetic analysis in which clearance and volume of distribution were identical to parameters determined from a standard pharmacokinetic study.
529	Remoxipride	80125-14-0	0.65	1.7	0.16	6.4	5.5	Widman M, Nilsson LB, Bryske B, and Lundstroem J (1993) Disposition of remoxipride in different species: species differences in metabolism. Arz. Forsch. 43: 287-297. von Bahr C, Movin G, Yisak WA, Jostell KG, and Widman M (199) Clinical pharmacokinetics of remoxipride. Acta Psych Scand. 358(Suppl) 41-44.	Note probable typo in the article by von Bahr et al stating that CL is 119 liter/min--interpreted as 119 mL/min
530	Repaglinide	135062-02-1	0.35	7.8	0.015	0.75	0.87	Hatorp V, Oliver S, and Su CAPF (1998) Bioavailability of repaglinide, a novel antidiabetic agent, administered orally in tablet or solution form or intravenously in healthy male volunteers. Int. J. Clin. Pharmacol. Ther. 36: 636-641. Plum A, Muller LK, and Jansen JA (2000) The effects of selected drugs on the in vitro protein binding of repaglinide in human plasma. Meth. Find. Exp. Clin. Pharmac…
531	Repinotan	144980-29-0	0.21	2.2	NF	1.6	1.2	Heining R, Sundaresan P, Shah A and Boettcher M (2005) Effect of Gender and Age on the Pharmacokinetics of Repinotan. Clin. Drug. Invest. 25: 125-134.
532	Ribavirin	36791-04-5	14	5.2	1	45	45	Paroni R, DelPuppo M, Borghi C, Sirtoni CR, and Galli Kienle M (1989) Pharmacokinetics of ribavirin and urinary excretion of the major metabolite 1,2,4-triazole-3-carboxamide in normal volunteers. Int. J. Clin. Pharmacol. Ther. Toxicol. 27: 302-307. Preston SL, Drusano GL, Glue P, Nash J, Gupta SK, and McNamara P (1999) Pharmacokinetics and absolute bioavailability of ribavirin in healthy volunte…
533	Ribostamycin	25546-65-0	0.25	1.5	NF	2.8	2.5	Yamasaku F, Suzuki Y, and Umemura K (1980) Pharmacokinetics of ribostamycin in healthy volunteers and patients with impaired renal function. Jap. J. Antibiot. 33: 1318-1331.	VDss calculated from micro rate constants reported in the reference.
534	Rifabutin	72559-06-9	9.3	2.4	0.29	65	37	Skinner MH, Hsieh M, Torseth J, Pauloin D, Bhatia G, Harkonen S, Merigan TC, and Blaschke TF (1989) Pharmacokinetics of rifabutin. Antimic. Agents Chemoter. 33: 1237-1241.
535	Rifampin	13292-46-1	0.97	3.5	0.2	4.6	3.8	Houin G, Beucler A, Richelet S, Brioude R, Lafaix C, and Tillement JP (1983) Pharmacokinetics of rifampicin and desacetylrifampicin in tuberculosis patients after different rates of infusion. Ther. Drug Monit. 5: 67-72.	One compartment model described, so VD was assumed as VDss.
536	Risedronic acid (Risedronate)	105462-24-6	6.3	1.5	0.76	70	200	Mitchell DY, Barr WH, Eusebio RA, Stevens KAP, Duke FP, Russell DA, Nesbitt JD, Powell JH, and Thompson GA (2001) Risedronate pharmacokinetics and intra- and inter-subject variability upon single-dose intravenous and oral administration. Pharm. Res. 18: 166-170. Actonel Product Label.
537	Risperidone	106266-06-2	1.1	5.4	0.1	3.4	3.2	Huang ML, Van Peer A, Woestenborghs R, De Coster R, Heykants J, Jansen AAI, Zylicz Z, Visscher HW, and Jonkman JHG (1993) Pharmacokinetics of the novel antipsychotic agent risperidone and the prolactin response in healthy subjects. Clin. Pharmacol. Ther. 54: 257-268. Mannens G, Meuldermans W, Snoeck E, and Heykants J (1994) Plasma protein binding of risperidone and its distribution in blood. Psyc…	CYP2D6 EM data only.
538	Ritodrine	26652-09-5	4.4	31	0.64	2.4	2.6	Caritis SN, Venkataramanan R, Darby MJ, Chiao JP, and Krew M (1990) Pharmacokinetics of ritodrine administered intravenously: recommendations for changes in the current regimen. Am. J. Obstet. Gynecol. 162: 429-437. Gross AS and Brown KF (1985) Plasma protein binding of ritodrine at parturition and in nonpregnant women. Eur. J. Clin. Pharmacol. 28: 479-481.	Data from pregnant women.
539	Rivastigmine	123441-03-2	1.3	12	0.6	1.9	1.4	Polinsky RJ (1998) Clinical pharmacology of rivastigmine: a new-generation acetylcholinesterase inhibitor for the treatment of Alzheimer's disease. Clin. Ther. 20: 634-647. Hossain M, Jhee SS, Shiovitz T, McDonald C, Sedek G, Pommier F, and Cutler NR (2002) Estimation of the absolute bioavailability of rivastigmine in patients with mild to moderate dementia of the Alzheimer's type. Clin. Pharmaco…	VDss calculated from data digitized from Hossain, et al.,
540	Rizatriptan	144034-80-0	1.9	16	0.86	1.97917	2.2	Vyas KP, Halpin RA, Geer LA, Ellis JD, Liu L, Cheng H, Chavez-Eng C, Matuszewski BK, Varga SL, Guiblin AR, and Rogers JD (2000) Disposition and pharmacokinetics of the antimigraine drug, rizatriptan, in humans. Drug Metab. Dispos. 28: 89-95. Lee Y, Conroy JA, Stepanavage ME, Mendel CM, Somers G, McLoughlin DA, Olah TV, De Smet M, Keymeulen B, and Rogers JD (1999) Pharmacokinetics and tolerability…
541	Rocuronium	143558-00-3	0.21	3.7	0.54	0.945946	1.6	Cooper RA, Maddineni VR, Mirakhur RK, Wierda JM, Brady M, and Fitzpatrick KT (1993) Time course of neuromuscular effects and pharmacokinetics of rocuronium bromide (Org 9426) during isoflurane anaethesia in patients with and without renal failure. Br. J. Anaesth. 71: 222-226. Roy JJ and Varin F (2004) Physicochemical properties of neuromuscular blocking agents and their impact on the pharmacokine…
542	Rolitetracycline	751-97-3	0.54	0.97	0.5	9.3	8.8	Dimmling T and Vanderbeke O (1975) Pharmakokinetik oral und intravenos verabreichbarer tetracyclinpraparate. Med. Klin. 70: 279-285. Rinati MV and Fleischmann L (1973) Legame con sieroproteine di alcune tetracicline e loro derivati idrosolubili. Cl. Terap. 71: 57-61.	Calculations made from reported C vs t data. Plasma concentrations were determined using bioassay.
543	Romidepsin	128517-07-7	1.2	7.4	NF	2.6	11	Sandor V, Bakke S, Robey RW, Kang MH, Blagosklonny MV, Bender J, Brooks R, Piekarz RL, Tucker E, Figg WD, Chan KK, Goldspiel B, Fojo AT, Balcerzak SP, and Bates SE (2002) Phase I trial of the histone deacetylase inhibitor, depsipeptide (FR901228, NSC 630176), in patients with refractory neoplasms.Clin. Cancer Res. 8: 718-728.
544	Ropivacaine	84057-95-4	0.75	5.5	0.06	2.3	2.2	Halldin MM, Bredberg E, Angelin B, Arvidsson T, Askemark Y, Elofsson S, and Widman M (1996) Metabolism and excretion of ropivacaine in humans. Drug Metab. Dispos. 24: 962-968. Jokinen MJ, Olkkola KT, Ahonen J, and Neuvonen PJ (2003) Effect of ciprofloxacin on the pharmacokinetics of ropivacaine. Eur. J. Clin. Pharmacol. 58: 653-657. Jokinen MJ, Olkkola KT, Ahonen J, and Neuvonen PJ (2001) Effect …
545	Roquinimex	84088-42-6	0.21	0.082	NF	43	31	Strandgarden K, Hoglund P, Nordle O, Polacek J, Wannman H, and Gunnarsson PO.(1999) Dissolution rate-limited absorption and complete bioavailability of roquinimex in man. Biopharm. Drug Dispos. 20: 347-354.
546	Rosiglitazone	122320-73-4	0.2	0.65	0.002	5.1	3.9	Cox PJ, Ryan DA, Hollis FJ, Harris AM, Miller AK, Vousden M, and Cowley H (2000) Absorption, disposition, and metabolism of rosiglitazone, a potent thiazolidinedione insulin sensitizer, in humans. Drug Metab. Dispos. 28: 772-780. Miller AK, DiCicco RA, and Freed MI (2002) The effect of ranitidine on the pharmacokinetics of rosiglitazone in healthy adult male volunteers. Clin. Ther. 24: 1062-1071.…
547	Rosuvastatin	287714-41-4	1.7	11	0.12	2.6	2	Martin PD, Warwick MJ, Dane AL, Brindley C, and Short T (2003) Absolute oral bioavailability of rosuvastatin in healthy white adult male volunteers. Clin. Ther. 25: 2553-2563. Crestor Product Label.
548	RPR 109881A	192573-38-9	12	14	NF	14	20	Sessa C, Cuvier C, Caldiera S, Bauer J, Van Den Bosch S, Monnerat C, Semiond D, Perard D, Lebecq A, Besenval M, and Marty M (2002) Phase I clinical and pharmacokinetic studies of the taxoid derivative RPR 109881A administered as a 1-hour or a 3-hour infusion in patients with advanced solid tumors. Ann. Oncol. 13: 1140-1150.
549	Saquinavir	127779-20-8	3.6	13	0.028	4.6	13	Kupferschmidt HHT, Fattinger KE, Ha HR, Follath F, and Krahenbuhl S (1998) Grapefruit juice enhances the bioavailability of the HIV protease inhibitor saquinavir in man. Br. J. Clin. Pharmacol. 45: 355-359. Holladay JW, Dewey MJ, Michniak BB, Wiltshire H, Halberg DL, Weigl P, Liang Z, Halifax K, Lindup WE, and Back DJ (2001) Elevated alpha-1-acid glycoprotein reduces the volume of distribution an…
550	SarCNU	81965-43-7	0.76	9	NF	1.4	1	Panasci L, Stinson SF, Melnychuk D, Sandor V, Miller WH, Batist G, Patenaudr F, Bangash N, Panarello L, Alaoui-Jamali M, and Sausville E (2003) SarCNU, a nitosourea analog on a day 1, 5, and 9 oral schedule: a phase I and pharmacokinetic study in patients with advanced solid tumors. J. Clin. Oncol. 21: 232-240.	VDss was calculated using C vs t data obtained by digitization of the plot provided in the reference.
551	Sch34343	95415-91-1	0.3	7.5	0.35	0.67	0.8	Lin CC, Lim J, Radwanski E, Kim, HK, Marco A, Lapiguera A, DiGiore C, and Symchowicz S (1987) Pharmacokinetics and metabolism of an intravenously administered penem (Sch 34343) in humans. Antimic. Ag. Chemother. 31: 84-87. Eliopoulos GM, Reiszner E, and Moellering RC (1985) In vitro activity of Sch 34343 against enterococci and other Gram-positive bacteria. Antimic. Agents Chemother. 27: 28-32.	VDss calculated from digitized C vs t plot.
552	Scopolamine	51-34-3	3.1	16	NF	3.2	4.5	Putcha L, Cintron NM, Tsui J, Vanderploeg JM and Kramer WG (1989) Pharmacokinetics and oral bioavailability of scopolamine in normal subjects. Pharm. Res. 6: 481-485.	VDss calculated from digitized C vs t plot.
553	Selegiline	2323-36-6	1.9	20	0.13	1.6	1.3	Heinonen, EH, Anttila, MI, Lammintausta, RAS.(1994) Pharmacokinetic aspects of l-deprenyl (selegiline) and its metabolites. Clin Pharmacol Ther. 56: 742-749. De la Torre R, Farre M, Navarro M, Pacifici R, Zuccaro P, and Pichini S (2004) Clinical pharmacokinetics of amfetamine and related substances: monitoring in conventional and non-conventional matrices. Clin. Pharmacokinet. 43: 157-185. Emsam …
554	Sematilide	101526-83-4	0.82	3.7	0.96	3.7	3.8	Shi J, Ripley E, Gehr TWB, Sica DA, Dandekar KA, and Hinderling PH (1996) Pharmacokinetics of sematilide in renal failure. J. Clin. Pharmacol. 36: 131-143. Hinderling PH, Dilea C, Koziol T, and Millington G (1993) Comparative kinetics of sematilide in four species. Drug Metab. Dispos. 21: 662-669.
555	Sildenafil	139755-83-2	1.4	9.1	0.04	2.6	3.9	Nichols DJ, Muirhead GJ, and Harness JA (2002) Pharmacokinetics of sildenafil citrate after single oral doses in healthy male subjects: Absolute bioavailability, food effects and dose proportionality. Br. J. Clin. Pharmacol. 53(Suppl. 1): 5S-12S. Walker DK, Ackland MJ, James GC, Muirhead GJ, Rance DJ, Wastall P, and Wright PA (1999) Pharmacokinetics and metabolism of sildenafil in mouse, rat, rab…
556	Sisomicin	32385-11-8	0.19	1	0.15	3.2	2.4	Chung M, Schrogie JJ, and Symchowicz S (1981) Pharmacokinetic study of sisomicin in humans. J. Pharmacokinet. Biopharm. 9: 535-551. Lode H, Kemmerich B, and Koeppe P(1975) Comparative clinical pharmacology of gentamicin, sisomicin, and tobramycin. Antimic. Agents Chemother. 8: 396-401. Pechere JC, Pechere MM, and Dugal R (1976) Clinical pharmacokinetics of sisomycin: two-compartment model analysi…
557	Sitafloxacin	127254-12-0	1.5	3.7	0.51	6.7	6.6	O'Grady J, Briggs A, Atarashi S, Kobayashi H, Smith RL, Ward J, Ward C, and Milatovic D (2001) Pharmacokinetics and absolute bioavailability of sitafloxacin, a new fluoroquinolone antibiotic, in healthy male and female Caucsian subjects. Xenobiotica 31: 811-822. Nakashima M, Uematsu T, Kosuge K, Umemura K, Hakusui H, and Tanaka M (1995) Pharmacokinetics and tolerance of DU-6859a, a new fluoroquin…	VDss calculated from CL and MRT reported in the reference.
558	Sitagliptin	486460-32-6	2.8	6	0.62	7.77778	12	Januvia Product Label	Intravenous clearance was calculated from oral dose, oral exposure, and absolute bioavailability reported in the product label for a 100 mg dose.
559	Solifenacin	242478-37-1	8.2	2.1	0.02	65	52	Kuipers ME, Krauwinkel WJJ, Mulder H, and Visser N (2004) Solifenacin demonstrates high absolute bioavailability in healthy men. Drugs R D 5: 73-81. Krauwinkel WJJ, Smulders RA, Mulder H, Swart PJ, and Taekema-Roelvink MEJ (2005) Effect of age on the pharmacokinetics of solifenacin in men and women. Int. J. Clin. Pharmacol. Ther. 43: 227-238.
560	Sotalol	3930-20-9	1.3	2	0.62	11	6.3	Poirier JM, Jaillon P, Lecocq B, Lecocq V, Ferry A, and Cheymol G (1990) The pharmacokinetics of d-sotalol and d,l-sotalol in healthy volunteers. Eur. J. Clin. Pharmacol. 38: 579-582. Salazar DE, Much DR, Nichola PS, Seibold JR, Shindler D, and Slugg PH (1997) A pharmacokinetic-pharmacodynamic model of d-sotalol Q-Tc prolongation during intravenous administration to healthy subjects. J. Clin. Pha…
561	Sparfloxacin	110871-86-8	3.9	2.7	0.55	24	20	Zagam Product Label.
562	Spectinomycin	1695-77-8	0.13	0.99	NF	2.2	1.8	Wagner, JG, Novak, E, Leslie, LG, Metzler, CM (1968) Absorption, distribution and elimination of spectinomycin dihydrochloride in man. Int. Zeit. Klin. Pharmakol. Ther. Toxikol. 1: 261-285.	VDss calculated from C vs t data obtained by digitization of plots in the reference.
563	Squalamine	148717-90-2	0.23	1.2	NF	3.2	9.5	Hao D, Hammond LA, Eckhardt SG, Patnaik A, Takimoto CH, Schwartz GH, Goetz AD, Tolcher AW, McCreery HA, Mamun K, Williams JI, Holroyd KJ, and Rowinsky EK (2003) A phase I and pharmacokinetic study of squalamine, an aminosterol angiogenesis inhibitor. Clin. Canc. Res. 9: 2465-2471.	VDss calculated from C vs t data obtained by digitization of the representative plot provided in the report.
564	Stavudine	3056-17-5	0.67	8.2	1	1.4	1.4	Dudley MN, Graham KK, Kaul S, Geletko S, Dunkle L, Browne M, and Mayer K (1992) Pharmacokinetics of stavudine in patients with AIDS or AIDS-related complex. J. Infec. Dis. 166: 480-485. Horton CM, Dudley MN, Kaul S, Mayer KH, Squires K, Dunkle L, and Anderson R (1995) Population pharmacokinetics of stavudine (d4T) in patients with AIDS or advanced AIDS-related complex. Antimic. Agents Chemother. …
565	Streptomycin	57-92-1	0.34	0.78	0.65	7.3	4.3	Zhu M, Burman WJ, Jaresko GS, Berning SE, Jeliffe RW, and Peloquin CA (2001) Population pharmacokinetics of intravenous and intramuscular streptomycin in patients with tuberculosis. Pharmacother. 21: 1037-1045. Gordon RC, Regamey C, and Kirby WMM (1972) Serum protein binding of the aminoglycoside antibiotics. Antimic. Agents Chemother. 2: 214-216.
566	Sufentanil	56030-54-7	9.4	15	0.075	10	14	Hudson RJ, Bergstrom RG, Thomson IR, Sabourin MA, Rosenbloom M, and Strunin L (1989) Pharmacokinetics of sufentanil in patients undergoing abdominal aortic surgery. Anesthesiol. 70: 426-431. Scholz J, Bause H, Schulz M, Klotz U, Krishna DR, Pohl S, Schulte am Esch J (1994) Pharmacokinetics and effects on intracranial pressure of sulfentanil in head trauma patients. Br. J. Clin. Pharmacol. 38: 369…
567	Sulbactam	68373-14-8	0.32	5.1	0.62	1	1.1	Foulds G, Stankewich JP, Marshall DC, O'Brien MM, Hayes SL, Weidler DJ, and McMahon FG (1983) Pharmacokinetics of sulbactam in human. Antimic. Agents Chemother. 23: 692-699. Rho JP, Castle S, Smith K, Bawdon RE, and Norman DC (1992) Effect of impaired renal function on the pharmacokinetics of coadministered cefoperazone and sulbactam. J. Antimic. Chemother. 29: 701-709. Foulds G, Miller RD, Knirs…
568	Sulbenicillin	41744-40-5	0.15	1.6	0.5	1.6	1.2	Hansen I, Jacobsen E, and Wels J (1975) Pharmacokinetics of sulbenicillin, a new broad-spectrum semisynthetic penicillin. Clin. Pharmacol. Ther. 17: 339-347. Bergan T (1984) Pharmacokinetics of beta-lactam antibiotics. Scand. J. Infect. Dis. 42(Suppl): 83-98.	CL and VDss calculated from digitized plot. Serum concentrations were detemined using bioassay.
569	Sulfadiazine	68-35-9	0.29	0.55	0.44	8.8	7	Mannisto PT, Mantyla R, Mattila J, Nykanen S, and Lamminsivu (1982) Coparison of pharmacokinetics of sulphadiazine and sulphamethoxazole after intravenous administration. J. Antimic. Chemother. 9: 461-470. Wijkstroem A and Westerlund D (1983) Plasma protein binding of sulfadiazine, sulfamethoxazole and trimethoprim determined by ultrafiltration. J. Pharm. Biomed. Anal. 1: 293-299.	VDss deteremined from Cvs t data obtained by digitization of plots in the reference.
570	Sulfamethoxazole	723-46-6	0.3	0.36	0.23	14	9.8	Dudley MN, Levitz RE, Quintiliani R, Hickingbotham JM, and Nightingale CH (1984) Pharmacokinetics of trimethoprim and sulfamethoxazole in serum and cerebrospinal fluid of adult patients with normal meninges. Antimic. Agents Chemother. 26: 811-814. Wijkstroem A and Westerlund D (1983) Plasma protein binding of sulfadiazine, sulfamethoxazole and trimethoprim determined by ultrafiltration. J. Pharm.…
571	Sulfinpyrazone	57-96-5	0.12	0.34	0.017	5.9	6.2	Lecaillion JB, Souppart C, Schoeller JP, Humbert G, and Massias P (1979) Sulfinpyrazone kinetics after intravenous and oral administration. Clin. Pharmacol. Ther. 26: 611-617. Schlicht F, Staiger C, de Vries J, Gundert-Remy U, Hildebrandt R, Harenberg J, Wang NS, and Weber E (1985) Pharmacokinetics of sulphinpyrazone and its major metabolites after a single dose and during chronic treatment. Eur.…	VDss calculated from rate microconstants reported in the reference.
572	Sulfisoxazole	127-69-5	0.17	0.3	0.079	9.4	7.4	Kaplan SA, Weinfeld RE, Abruzzo CW, and Lewis M (1972) Pharmacokinetic profile of sulfisoxazole following intravenous, intramuscular, and oral administration to man. J. Pharm. Sci. 61; 773-778. Oie S, Gambertoglio JG, and Fleckenstein L (1982) Comparison of the disposition of total and unbound sulfisoxazole after single and multiple dosing. J. Pharmacokinet. Biopharm. 10: 157-72. Du Souich P, Cal…	Pharmacokinetic parameters were calculated from C vs t data provided in the reference by Kaplan, et al..
573	Sumatriptan	103628-46-2	1.7	19	0.83	1.5	1.7	Cosson VF, Fuseau E, Efthymiopoulos C, and Bye A (1997) Mixed effect modeling of sumatriptan pharmacokinetics during drug development. I Interspecies allometric scaling. J. Pharmacokinet. Biopharm. 25: 149-167. Scott AK (1994) Sumatriptan clinical pharmacokinetics. Clin. Pharmacokinet. 27: 337-344.
574	Suprofen	40828-46-4	0.04	0.76	0.006	0.88	2.1	Zulliger HW and Fassolt A (1985) Pharmacokinetics and bioavailability of suprofen injection solution after intravenous application versus capsules on six healthy male volunteers. Arzneim.Forsch. 35: 976-980. Chaikin P, Chasin M, Kennedy B, and Silverman BK (1983) Suprofen concentrations in human breast milk. J. Clin. Pharmacol. 23: 385-390.	All parameters were calculated from C vs t data provided in the reference.
575	Suramin	145-63-1	0.54	0.0057	0.003	1400	1200	Collins, JM, Klecker, RW, Yarchoan, R, Lane, HC, Fauci, AS, Redfield, RR, Broder, S, Myers, CE (1986) Clinical pharmacokinetics of suramin in patients with HTLV-III/LAV infection. J Clin Pharmacol. 26: 22-26.
576	Tacrine	321-64-2	11	56	0.25	3.3	3.3	Lou G, Montgomery PR, and Sitar DS (1996) Bioavailability and pharmacokinetic disposition of tacrine in elderly patients with Alzheimer's disease. J. Psych. Neurosci. 21: 334-339. Makela PM, Truman CA, Ford JM, and Roberts CJC (1994) Characteristics of plasma protein binding of tacrine hydrochloride: a new drug for Alzheimer's disease. Eur. J. Clin. Pharmacol. 47: 151-155.
577	Tacrolimus	104987-11-3	1.2	0.7	0.01	27	26	Mancinelli LM, Frassetto L, Floren LC, Dressler D, Carrier S, Bekersky I, Benet LZ, and Christians U (2001) The pharmacokinetics and metabolic disposition of tacrolimus: a comparison across ethnic groups. Clin. Pharmacol. Ther. 69: 24-31. Iwasaki K, Miyazaki Y, Teramura Y, Kawamura A, Tozuka Z, Hata T, and Undre N (1996) Binding of tacrolimus (FK506) with human plasma proteins re-evaluation and e…
578	Talinolol	57460-41-0	3.3	4.9	0.39	11	11	Trausch B, Oertel R, Richter K, and Gramatte T (1995) Disposition and bioavailability of the beta1-adrenoreceptor antagonist talinolol in man. Biopharm. Drug Dispos. 16: 403-414. Trausch B, Oertel R, Richter K, and Gramatte T (1995) Die proteinbindung von talinolol. Pharmazie 50: 72.
579	Tamsulosin	106133-20-4	0.21	0.62	0.01	5.6	6.8	van Hoogdalem E, Soeishi Y, Matsushima H, and Higuchi S (1997) Disposition of the selective alpha1A-adrenoceptor antagonist tamsulosin in humans: comparison with data from interspecies scaling. J. Pharm. Sci. 86: 1156-1161. Matsushima H, Kamimura H, Soeishi Y, Watanabe T, Higuchi S, and Tsunoo M (1998) Pharmacokinetics and plasma protein binding of tamsulosin hydrochloride in rats, dogs, and huma…
580	Tegaserod	145158-71-0	5.3	18	0.02	4.9	11	Appel-Dingemanse S, Lemarechal MO, Kumle A, Hubert M, and Legangneux E (1999) Integrated modelling of the clinical pharmacokinetics of SDZ HTF 919, a novel selective 5-HT4 receptor agonist, following oral and intravenous administration. Br. J. Clin. Pharmacol. 47: 483-491. Appel-Dingemanse S (2002) Clinical pharmacokinetics of tegaserod, a serotonin 5-HT4 receptor partial agonist with promotile a…
581	Teicoplanin A2-1	61036-64-4	1.5	0.2	0.11	140	150	Antony KK, Lewis EW, Kenny MT, Dulworth JK, Brackman MB, Kuzma R, Yuh L, Eller MG, and Thompson GA (1991) Pharmacokinetics and bioavailability of a new formulation of teicoplanin following intravenous and intramuscular administration to humans. J. Pharm. Sci. 80: 605-607. Bonati M, Traina GL, Villa G, Salvadeo A, Gentile MG, Fellin G, Rosina R, Cavenaghi L, and Buniva G (1987) Teicoplanin pharmac…
582	Telavancin	372151-71-8	0.11	0.2	0.07	9.2	6.7	Sun HK, Duchin K, Nightingale CH, Shaw JP, Seroogy J, and Nicolau DP (2006) Tissue penetration of telavancin after intravenous administration in healthy subjects. Antimicr. Agents Chemother. 50: 788-790. Shaw JP, Seroogy J, Kaniga K, Higgins DL, Kitt M, and Barriere S (2005) Pharmacokinetics, serum inhibitory and bacteriocidal activity, and safety of telavancin in healthy subjects. Anitmic. Agent…
583	Telithromycin	191114-48-4	3	14	0.41	3.6	12	Perret C, Lenfant B, Weinling E, Wessels DH, Scholtz HE, Montay G, and Sultan E (2002) Pharmacokinetics and Absolute Oral Bioavailability of an 800-mg Oral Dose of Telithromycin in Healthy Young and Elderly Volunteers. Chemotherapy 48: 217-223. Yamazaki H, Lamy S, Ducelier C, Bonnat C, and Lenfant B (2003) Study of binding of telithromycin to human serum proteins. Nippon Kagaku Ryoho Gakkai Zassh…
584	Telmisartan	144701-48-4	5.3	8.4	0.004	11	20	Stangier J, Schmid J, Turck D, Switek H, Verhagen A, Peeters PAM, van Marle SP, Tamminga WJ, Sollie FAE, and Jonkman JHG (2000) Absorption, metabolism, and excretion of intravenously and orally administered [14C]telmisartan in healthy volunteers. J. Clin. Pharmacol. 40: 1312-1322.
585	Temozolomide	85622-93-1	0.5	3.6	NF	2.3	1.5	Marzolini C, Decosterd LA, Shen F, Gander M, Leyvraz S, Bauer J, Buclin T, Biollaz J, and Lejeune F (1998) Pharmacokinetics of temozolamide in association with fitemustine in malignant melanoma and malignant glioma patients: comparison of oral, intravenous, and hepatic intra-arterial administration. Canc. Chemother. Pharmacol. 42: 433-440.	VDss calculated from digitized C vs t plot provided in the report.
586	Temsirolimus	162635-04-3	3	7.7	NF	10	18	Raymond E, Alexandre J, Faivre S, Vera K, Materman E, Boni J, Leister C, Korth-Bradley J, Hanauske A, and Armand JP (2004) Safety and pharmacokinetics of escalated doses of weekly intravenous infusion of CCI-779, a novel mTOR inhibitor, in patients with cancer. J. Clin. Oncol. 12: 2336-2347.
587	Teniposide	29767-20-2	0.41	0.19	0.0044	37	16	Holthuis JJM, de Vries LGE, Postmus PE, van Oort WWJ, Verleun H, Hulshoff A, Sleijfer DT, and Mulder NH (1987) Pharmacokinetics of high-dose teniposide. Canc. Treatm. Rep. 71: 599-603. Petros WP, Rodman JH, Relling MV, Christensen M, Pui CH, Rivera GK, and Evans WE (1992) Variability in teniposide plasma protein binding is correlated with serum albumin concentrations. Pharmacother. 12: 273-277.
588	Tenofovir	147127-20-6	0.83	3.1	0.93	3.8	5.8	Deeks SG, Barditch-Crovo P, Lietman PS, Hwang F, Cundy KC, Rooney JF, Hellman NS, Safrin S, and Kahn JO (1998) Safety, pharmacokinetics, and antiretroviral activity of intravenous 9-[2-(R)-(phosphonomethoxy)propyl]adenine, a novel anti-human immunodeficiency virus (HIV) therapy, in HIV-infected adults. Antimic. Agents Chemother. 42: 2380-2384. Fung HB, Stone EA, and Piacenti FJ (2002) Tenofovir d…	Averaged data from two dose levels.
589	Tenoxicam	59804-37-4	0.19	0.03	0.0085	92	67	Heintz RC, Guentert TW, Enrico JF, Dubach UC, Brandt R, and Jeunet FS (1984) Pharmacokinetics of tenoxicam in healthy human volunteers. Eur. J. Rheum. Inflam. 7: 33-44. Nilsen OG, Aasarod K, Wideroe TE, and Guentert TW (2001) Single- and multiple-dose pharmacokinetics, kidney tolerability and plasma protein binding of tenoxicam in renally impaired patients and healthy volunteers. Pharmacol. Toxic…	VDss calculated from reported micro rate constants in Heintz, et al..
590	Terazosin	63590-64-7	0.98	1.1	0.08	15	9	Patterson SE (1985) Terazosin kinetics after oral and intravenous doses. Clin. Pharmacol. Ther. 38: 423-427. Sonders RC (1986) Pharmacokinetics of terazosin. Am. J. Med. 80: 20-24.	VDss calculated from reported micro rate constants.
591	Terbutaline	23031-25-6	1.5	3.4	0.75	7.4	15	Borgstrom L, Nyberg L, Jonsson S, Lindberg C, and Paulson J (1989) Pharmacokinetic evaluation in man of terbutaline given as separate enantiomers and as the racemate. Br. J. Clin. Pharmacol. 27: 49-56. Nyberg L (1984) Pharmacokinetic parameters of terbutaline in healthy man. An overview. Eur. J. Resp. Dis. 65(Suppl 134) 149-160. Leferink JG, van den Berg W, Wagemaker-Engels I, Kreukniet J, and Ma…	Cited terminal phase t1/2. Data are for the racemate.
592	Terodiline	15793-40-5	5.1	1.1	0.08	81	56	Hallen B, Gabrielsson J, Palmer L, and Ekstrom B (1993) Pharmacokinetics of R(+)-terodiline given intravenously and orally to healthy volunteers. Pharmacol. Toxicol. 73: 153-158. Hallen B, Gabrielsson J, Nyambati S, Johansson A, Larsson E, and Guilbaud O (1995) Concomitant single-dose and multiple-dose pharmacokinetics of terodiline in man, with a note on its enantiomers and major metabolites. Ph…
593	Tesaglitazar	251565-85-2	0.13	0.039	0.0011	56	45	Ericsson H, Hamren B, Bergstrand S, Elebring M, Fryklund L, Heijer M, and Ohman KP (2004) Pharmacokinetics and metabolism of tesaglitazar, a novel dual acting peroxisome proliferator-activated receptor alpha/gamma agonist, after a single oral and intravenous dose in humans. Drug Metab. Dispos. 32: 923-929.
594	Tetracycline	60-54-8	1.2	1.5	0.78	12	9.4	Kunin CM, Darnbush AC, and Finland M (1959) Distribution and excretion of four tetracycline analogs in normal young men. J. Clin. Invest. 38: 1950-1963.	calculated from digitized plots
595	Tetrahydrocannabinol, D9-	1972-08-3	8.9	3.2	0.05	46	33	Wall ME, Sadler BM, Brine D, Taylor H, and Perez-Reyes M (1983) Metabolism, disposition, and kinetics of delta-9-tetrahydrocannabinol in men and women. Clin. Pharmacol. Ther. 34: 352-363. Busto U, Bendayan R, and Sellers EM (1989) Clinical pharmacokinetics of non-opiate abused drugs. Clin. Pharmacokinet. 16: 1-26.	VDss was calculated using C vs t data provided in the reference.
596	Tezosentan	180384-57-0	0.28	8.1	0.0085	0.58	3.8	Dingemanse J, Clozel M, and Giersbergen PLM (2002) Pharmacokinetics and pharmacodynamics of tezosentan, an intravenous dual endothelin receptor antagonist, following chronic infusion in healthy subjects. Br. J. Clin. Pharmacol. 53: 355-362. Treiber A, Van Giersbergen PLM, and Dingemanse J (2003) In vivo and in vitro disposition profile of tezosentan, an intravenous dual endothelin receptor antago…
597	Thalidomide	50-35-1	0.95	3.4	0.4	4.3	4.7	Eriksson T, Bjorkman S, Roth B, and Hoglund P (2000) Intravenous formulations of the enantiomers of thalidomide: pharmacokinetic and initial pharmacodynamic characterization in man. J. Pharm. Pharmacol. 52: 807-817. Eriksson T, Bjorkman S, and Hoglund P (2001) Clinical pharmacology of thalidomide. Eur. J. Clin. Pharmacol. 57: 365-376.	Values represent the average for bioth stereoisomers, which interconvert.
598	Theophylline	58-55-9	0.51	0.86	0.61	9.9	7.2	Kraan J, Borgstrom L, Koeter GH, Laseur M, Jonkman JHG, and deNoord OE (1988) Creation of four consecutive intantaneous steady-state plasma concentration plateaus of theophylline and enprofylline by repeated infusions with expoonentially decreasing delivery rates. Eur. J. Clin. Pharmacol. 35: 657-661. Lee KJ, Mower R, Hollenbeck T, Castelo J, Johnson N, Gordon P, Sinko PJ, Holme K, and Lee YH (20…
599	Thionylan (Methapyrilene)	91-80-5	3.3	28	NF	2	1.6	Calandre EP, Alferez N, Hassanein K, and Azarnoff DL (1981) Methapyrilene kinetics and dynamics. Clin. Pharmacol. Ther. 29: 527-532.	VDss calculated from C vs t data obtained by digitization of the plot included in the reference.
600	Thiopental	76-75-5	1.2	8.2	0.14	2.4	2	Cordato DJ, Gross AS, Herkes GK, and Mather LE (1997) Pharmacokinetics of thiopentone enantiomers following intravenous injection or prolonged infusion of rac-thiopentone. Br. J. Clin. Pharmacol. 43: 355-362. Kurz H, Mauser-Ganshorn A, and Stickel HH (1977) Differences in the binding of drugs to plasma proteins from newborn and adult man. I. Eur. J. Clin. Pharmacol. 11: 463-467.	Data from individual stereoisomers were combined. Half-life was estimated from the C vs t plot provided in the reference.
601	Thiotepa	52-24-4	1.6	6.7	0.9	4	2.7	Ackland SP, Choi KE, Ratain MJ, Egorin MJ, Williams SF, Sinkule JA, and Bitran JD (1988) Human plasma pharmacokinetics of thiotepa following administration of high-dose thiotepa and cyclophosphamide. J. Clin. Oncol. 6: 1192-1196. Hagen B and Nilsen OG (1987) The binding of thio-TEPA in human serum and to isolated serum protein fractions. Cancer Chemother. Pharmacol. 20: 319-323.
602	Tiagabine	115103-54-3	1.1	1.6	0.04	12	10	Jansen JA, Oliver S, Dirach J, and Mengel HB (1995) Absolute bioavailability of tiagabine. Epilepsia 36(Suppl. 3): s159
603	Tiazofurin	60084-10-8	1.1	2.4	NF	7.6	5.9	Jayaram HN, Lapis E, Tricot G, Kneebone P, Paulik E, Zhen W, Engeler GP, Hoffmann R, and Weber G (1992) Clinical pharmacokinetic study of tiazofurin administered as a 1-hour infusion. Int. J. Canc. 51: 182-188. Roberts JD, Stewart JA, McCormish JJ, Krakoff IR, Culham CA, Hartshorn JN, Newman RA, Haugh LD, and Young JA (1987) Phase 1 trail of tiazofurin administered by iv bolus daily for 5 days, w…
604	Ticarcillin	34787-01-4	0.16	1.8	0.55	1.5	1	Watanabe K, Koyama M, Iijima F, Nakazawa H, and Nakahira K (1986) Phase I studies on BRL 28500 (clavulanic acid-ticarcillin). Chemotherapy 34: 247. Bergan T (1984) Pharmacokinetics of beta-lactam antibiotics. Scand. J. Infect. Dis. 42(Suppl): 83-98. Libke RD, Clarke JT, Ralph ED, Luthy RP, and Kirby WMM (1975) Ticarcillin vs carbenicillin: clinical pharmacokinetics. Clin. Pharmacol. Ther. 17: 441…	Combined data from Watanabe and Libke papers
605	Tigecycline	220620-09-7	12	3.8	0.2	53	48	Muralidharan G, Micalizzi M, Speth J, Raible D, and Trpy S (2005) Pharmacokinetics of tigecycline after single and multiple doses in healthy subjects. Antimic. Agents Chemother. 49: 220-229. Doan TL, Fung HB, Mehta D, and Riska PF (2006) Tigecycline: a glycylcycline antimicrobial agent. Clin. Ther. 28: 1079-1106.
606	Tilidine	51931-66-9	4	16	0.21	4.2	5	Vollmer KO, Thomann P, and Hengy H (1989) Pharmacokinetics of tilidine and metabolites in man. Arz. Forsch. 39: 1283-1288. Janicke UA and Gundert-Remy U (1985) Stereoselective protein binding of (+/-)-cis and (+/-) trans tilidine. Arch. Pharmacol. 329: R101.
607	Timolol	26839-75-8	1.5	8.5	0.9	3	2.2	Vermeij P, el Sherbini-Schepers M, and van Zweiten PA (1978) The disposition of timolol in man. J. Pharm. Pharmacol. 30: 53-55. Meier J (1982) Pharmacokinetic comparison of pindolol with other beta adrenoceptor blocking agents. Am. Heart J. 104: 364-373.	Parameters were calculated from C vs t data obtained by digitization of plots in the reference.
608	Tinidazole	19387-91-8	0.59	0.6	0.8	16	13	Vinge E, Andersson KE, Ando G, and Lunell E (1983) Biological availability and pharmacokinetics of tinidazole after single and repeated doses. Scand. J. Infect. Dis. 15: 391-397. Sawyer PR, Brogden RN, Pinder RM, Speight TM, and Avery GS (1976) Tinidazole: a review of its antiprotozoal activity and therapeutic efficacy. Drugs 11: 423-440.	VDss calculated from digitized C vs t plot.
609	Tirapazamine	27314-97-2	0.56	8.9	0.81	1	0.78	Senan S, Rampling R, Graham MA, Wilson P, Robin H, Eckardt N, Lawson N, McDonald A, von Roemeling R, Workman P, and Kaye SB (1997) Phase I and pharmacokinetic study of tirapazamine (SR 4233) administered every three weeks. Clin. Cancer Res. 3: 31-38. Robin H, Senan S, Workman P, and Graham MA (1995) development and validation of a sensitive solid-phase extraction and high performance liquid chrom…
610	Tirofiban	142373-60-2	0.99	4.3	0.36	1.8	1.6	Barrett JS, Murphy G, Peerlinck K, De Lepeliere I, Gould RJ, Panebianco D, Hand E, Deckmyn H, Vermylen J, and Arnout J (1994) Pharmacokinetics and pharmacodynamics of MK-383, a selective non-peptide platelet glycprotein-IIb/IIIa receptor antagonist, in healthy men. Cin. Pharmacol. Ther. 56: 377-388. Kondo K and Umemura K (2002) Clinical pharmacokinetics of tirofiban, a nonpeptide glycoprotein IIb…
611	Tizanidine	51322-75-9	2.4	11	0.7	3.6	2.4	Zanaflex Product Label. Granfors MT, Backman JT, Laitila J, and Neuvonen PJ (2004) Tizanidine is mainly metabolized by cytochrome P450 1A2 in vitro. Br. J. Clin. Pharmacol. 57: 349-353.	Clearance value cited in Granfors, et al.
612	Tobramycin	32986-56-4	0.23	1.6	1	2.4	2	Bourget P, Fernandez H, Delouis C, abd Taburet AM (1991) Pharmacokinetics of tobramycin in pregnant women, safety and efficacy of a once-daily dose regimen. J. Clin. Pharm. Ther. 16: 167-176. Champoux N, Du Souich P, Ravaoarinoro M, Phaneuf D, Latour J, and Cusson JR (1996) Single-dose pharmacokinetics of ampicillin and tobramycin administered by hypodermoclysis in young and older healthy volunte…	Data from Champeaux et al was digitized to calculate parameters.
613	Tocainide	41708-72-9	1.8	2.2	0.87	14	12	Lalka D, Meyer MB, Duce BR, and Elvin AT (1976) Kinetics of the oral antiarrhythmic lidocaine congener, tocainide. Clin. Pharmacol. Ther. 19: 757-766. Thomson AH, Murdoch G, Pottage A, Kelman AW, Whiting B, and Hillis WS (1986) The pharmacokinetics of R- and S-tocainide in patients with acute ventricular arrhythmias. Br. J. Clin. Pharmacol. 21: 149-154, Sedman AJ, Bloedow DC, and Gal J (1982) Ser…	Combined data from individual enantiomers.
614	Tolamolol	38103-61-6	4	14	0.089	4.8	2.5	Faulkner JK, Stopher DA, Walden R, Singleton W, and Taylor SH (1975) Pharmacokinetic and pharmacological studies with tolamolol in man. Br. J. Clin. Pharmacol. 2: 423-428.	VDss calculated from reported micro rate constants.
615	Tolbutamide	64-77-7	0.12	0.21	0.05	9.5	7	Zilly W, Breimer DD, and Richter E (1975) Induction of drug metabolism in man after rifampicin treatment measured by increased hexobarbital and tolbutamide clearance. Eur. J. Clin. Pharmacol. 9: 219-227. Ayanoglu G, Uihlein M, and Grigoleit HG (1986) A new aspect of serum protein binding of tolbutamide. Int. J. Clin. Pharmacol. Ther. Toxicol. 24: 65-68.	Concentration-dependent protein binding reported; free fraction value is cited that was collected at relevant circulating concentrations.
616	Tolcapone	134308-13-7	0.12	1.9	0.0012	1.1	1.1	Jorga KM, Kroodsma JM, Fotteler B, Heizmann P, Meyer J, Rasch MC, and van Hattum J (1998) Effect of liver impairment on the pharmacokinetics of tolcapone and its metabolites. Clin. Pharmacol. Ther. 63: 646-654.
617	Toloxatone	29218-27-7	1.5	11	0.49	2.3	1.6	Strolin Benedetti M, Rovei V, Dencker SJ, Nagy A, and Johansson R (1982) Pharmacokinetics of toloxatone in man following intravenous and oral administrations. Arz. Forsch. 32: 276-280.	VDss calculated from C vs t data obtained by digitization of the plot provided in the reference.
618	Tolterodine	124937-51-5	1.5	8.4	0.037	2.97619	2.4	Brynne N, Stahl MMS, Hallen B, Edlund PO, Palmer L, Hoglund P, and Gabrielsson J (1997) Pharmacokinetics and pharmacodynamics of tolterodine in man: a new drug for the treatment of urinary bladder overactivity. Int. J. Clin. Pharmacol. Ther. 35: 287-295. Brynne N, Dalen P, Alvan G, Bertilsson L, and Gabrielsson J (1998) Influence of CYP2D6 polymorphism on the pharmacokinetics and pharmacodynamics…	Data from CYP2D6 EM subjects included.
619	Tomopenem	222400-20-6	0.23	1.9	0.91	2	1.7	Shibayama T, Matsushita Y, Hirota T, Ikeda T, and Kuwahara S (2006) Pharmacokinetics of CS-023 (RO4908463), a novel parenteral carbapenem, in healthy male Caucasian volunteers. Antimicr. Agents Chemother. 50: 4186-4188. Shibayama T, Matsushita Y, Kawai K, Hirota T, Ikeda T, and Kuwahara S (2007) Pharmacokinetics and disposition of CS-023 (RO4908463), a novel parenteral carbapenem, in animals Anti…
620	Topixantrone	156090-18-5	57	27	NF	39	45	Mross K, Scheulen ME, Licht T, Unger C, Richly H, Stern AC, Kutz K, Camboni MG, Barbieri P, Verdi E, Vincenzi B, and Bernareggi A (2004) Phase I clinical and pharmacokinetic study of BBR 3576, a novel aza-anthropyrazole, administered i.v. every 4 weeks in patients with advanced solid tumors: a phase 1 study group trial of the Central European Society of Anticancer Drug Research (CESAR). Anti-Canc…
621	Topotecan	123948-87-8	1.8	13	0.65	2.3	2.3	Schellens JHM, Creemers GJ, Beijnen JH, Rosing H, de Boer-Dennert M, McDonald M, Davies B, and Verweij J (1996) Bioavailability and pharmacokinetics of oral topotecan: a new topoisomerase I inhibitor. Br. J. Canc. 73: 1268-1271. van Warmerdam LJC, Verweij J, Schellens JHM, Rosing H, Davies BE, de Boer-Dennert M, Maes RAA, and Beijnen JH (1995) Pharmacokinetics and pharmacodynamics of topotecan ad…
622	Torsemide	56211-40-6	0.21	0.53	0.01	6.6	5.1	Spahn H, Knauf H, and Mutschler E (1990) Pharmacokinetics of torasemide and its metabolites in healthy controls and in chronic renal failure. Eur. J. Clin. Pharmacol. 39: 345-348. Knauf H and Mutschler E (1998) Clinical pharmacokinetics and pharmacodynamics of torasemide. Clin. Pharmacokinet. 34: 1-24.	VDss calculated from reported MRT.
623	Trabectedin	114899-77-3	25	12	NF	35	44	Lau L, Supko JG, Blaney S, Harshon L, Seibel N, Krailo M, Qu W, Malkin D, Jimeno J, Bernstein M, and Baruchel S (2005) A phase I and pharmacokinetic study of ecteinascidin-743 (Yondelis) in children with refractory solid tumors. A children's oncology group study. Clin. Canc. Res. 11: 672-677.	Note: Pharmacokinetic data were from children.
624	Tramadol	27203-92-5	2.8	6.5	0.8	7.2	5.8	Lintz W, Barth H, Osterloh G, and Schmidt-Boethelt E (1998) Pharmacokinetics of tramadol and bioavailability of enteral tramadol formulations. 3rd communication. Suppositories. Arz. Forsch. 48: 889-899. Grond S and Sablotzki A (2004) Clinical pharmacology of tramadol. Clin. Pharmacokinet. 43: 879-923.	Parameters calculated from data reported in a table in Lintz, et al.
625	Tranexamic acid	1197-18-8	0.38	2.4	NF	2.6	2.3	Puigdellivol E, Carral ME, Moreno J, Pla-Delfina JM, and Jane F (1985) Pharmacokinetics and absolute bioavailability of intramuscular tranexamic acid in man. Int. J. Clin. Pharmacol. Ther. Toxicol. 23: 298-301.	PK parameters were calculated from reported C vs t data. Data table in the report has incorrect units.
626	Traxoprodil	134234-12-1	4.4	27	0.63	2.6	3.7	Taylor TJ, Diringer K, Russell T, Venkatakrishnan K, Wilner K, Crownover PH, Benincosa LJ, and Gibbs MA (2006) Absolute oral bioavailability of traxoprodil in cytochrome P450 2D6 extensive and poor metabolizers. Clin. Pharmacokin. 45: 989-1001. Protein binding from in-house data, Pfizer, Inc.	Data from CYP2D6 extensive metabolizers.
627	Trazodone	19794-93-5	0.52	1.4	NF	6.2	7.3	Nilsen OG and Dale O (1992) Single dose pharmacokinetics of trazodone in healthy subjects. Pharmacol. Toxicol. 71: 150-153.	VDss calculated from C vs t data obtained by digitization of the plot provided in the reference.
628	Triamcinolone Acetonide	76-25-5	1.4	9.4	0.2	2.5	2.4	Argenti D, Shah B, Heald D (1999) A pharmacokinetic study to evaluate the absolute bioavailability of triamcinolone acetonide following inhalation administration. J. Clin. Pharmacol. 39: 695-702. Mager DE and Jusko WJ (2002) Quantitative structure pharmacokinetic/pharmacodynamic relationships of corticosteroids in man. J. Pharm. Sci. 91: 2441-2451.	VDss calculated from C vs t data obtained by digitization of the plot provided in the reference.
629	Triamterene	396-01-0	13	63	0.42	3.4	4.3	Gilfrich HJ, Kremer G, Mohrke W, Mutschler E, and Volger KD (1983) Pharmacokinetics of triamterene after i.v. administration to man: determination of bioavailability. Eur. J. Clin. Pharmacol. 25: 237-241. Hasegawa J, Lin ET, Williams RL, Sorgel F, and Benet LZ (1982) Pharmacokinetics of triamterene and its metabolite in man. J. Pharmacokinet. Biopharm. 10: 507-523.
630	Triazolam	28911-01-5	0.58	3	0.1	3.2	2.7	Vanderveen RP, Jirak JL, Peters GR, Cox SR, and Bombardt PA (1991) Effect of ranitidine on the disposition of orally and intravenously administered triazolam. Clin. Pharm. 10: 539-543. Kroboth PD, Smith RB, Sorkin MI, Silver MR, Rault R, Garry M, and Juhl RP (1984) Triazolam protein binding and correlation with alpha-1 acid glycoprotein concentration. Clin. Pharmacol. Ther. 36: 379-383.	VDss calculated from C vs t data obtained by digitization of the plot provided in the reference.
631	Trimazosin	35795-16-5	0.18	0.96	NF	3.1	3.1	Meredith PA, Elliott HL, Kelman AW, and Reid JL (1985) Application of pharmacokinetic-pharmacodynamic modelling for the comparison of quinazoline alpha-adrenoreceptor agonists in normotensive volunteers. J. Cardiovasc. Pharmacol. 7: 532-537.
632	Trimethoprim	738-70-5	1.5	2.1	0.5	12	9.6	Mannisto PT, Mantyla R, Mattila J, Nykanen S, and Lamminsivu U (1982) Comparison of pharmacokinetics of sulphadiazine and sulphamethoxazole after intravenous infusion. J. Antimic. Chemother. 9: 461-470. Dudley MN, Levitz RE, Quintiliani R, Hickingbotham JM, and Nightingale CH (1984) Pharmacokinetics of trimethoprim and sulfamethoxazole in serum and cerebrospinal fluid of adult patients with norma…	VDss calculated from C vs t data obtained by digitization of the plot showing the 200 mg dose.
633	Trimetrexate	52128-35-5	0.77	0.77	0.05	17	17	Neutrexin Product Label
634	Trimipramine	739-71-9	16	16	0.051	17	23	Abernethy DR, Greenblatt DJ, and Shader RI (1984) Trimipramine kinetics and absolute bioavailability: use of gas-liquid chromatography with nitrogen-phosphorus detection. Clin. Pharmacol. Ther. 35: 348-353.	VDss calculated from C vs t data obtained by digitization of the plot provided in the reference.
635	Tropisetron	89565-68-4	9.7	26	NF	6.3	5.6	Kees F, Farber L, Bucher M, Mair G, Morike K, and Grobecker H (2001) Pharmacokinetics of therapeutic doses of tropisetron in healthy volunteers. Br. J. Clin. Pharmacol. 52: 705-707.
636	Trospectomycin	88669-04-9	0.7	1.7	NF	6.9	11	Nichols DJ, Bye A, and Novak E (1991) Pharmacokinetics of trosectomycin sulphate in healthy subjects after single intravenous and intramuscular doses. Br. J. Clin. Pharmacol. 32: 255-257.	Averaged data from all dose levels.
637	Trovafloxacin	147059-72-1	1.3	1.4	0.24	15	11	Vincent J, Venitz J, Teng R, Baris BA, Willavize SA, Polzer RJ, and Friedman HL (1997) Pharmacokinetics and safety of trovafloxacin in healthy male volunteers following administration of single intravenous doses of the prodrug, alatrovafloxacin. J. Antimic. Chemother. 39(Suppl B): 75-80. Teng R, Liston TE, Harris SC (1996) Multiple-dose pharmacokinetics and safety of trovafloxacin in healthy volu…	Dosed as alatrovafloxacin prodrug which is very rapidly converted to trovafloxacin.
638	Troxacitabine	145918-75-8	1	2.4	NF	6.9	82	Giles FJ, Cortes JE, Baker SD, Thomas DA, O'Brien S, Smith TL, Beran M, Bivins C, Jolivet J, and Kantarjian HM. (2001) Troxacitabine, a novel dioxolane nucleoside analog, has activity in patients with advanced leukemia. J. Clin. Oncol. 19: 762-771.
639	Tubocurarine	57-94-3	0.45	3.4	0.58	2.2	2	Razman IM, Shanks CA, and Triggs EJ (1978) Studies of d-tubocurarine pharmacokinetics in humans and dogs. Anaesth. Intens. Care 6: 30-35. Ghoneim MM, Kramer SE, Bannow R, Pandya H, and Routh JI (1973) Binding of d-tubocurarine to plasma proteins in normal man and in patients with hepatic or renal disease. Anesthesiol. 39: 410-415.	Pharmacokinetic parameters determined from reported two-compartment model parameters.
640	UK-240,455	178908-09-3	0.8	6	0.13	2.2	1.4	Webster R, Cole S, Gedge J, Roffey S, Walker D, and Wild W (2003) Pharmacokinetics and disposition of a novel NMDA glycine site antagonist (UK-240,455) in rats, dogs, and man. Xenobiotica 33: 541-560.
641	Urapidil	34661-75-1	0.75	3.1	NF	4	3.5	Zech K, Steinijans VW, and Radtke HW (1986) Pharmacokinetics of urapidil in normal subjects. In Amery (Ed) Treatment of Hypertension with Urapidil: Preclinical and Clinical Update. 29-38, ICSS 101, RSM Services Ltd, London.	VDss calculated using C vs t data obtained from a digitized plot.
642	Valproic Acd	99-66-1	0.14	0.16	0.084	15	12	Bryson SM, Verma N, Scott PJW, and Rubin PC (1983) Pharmacokinetics of valproic acid in young and elderly subjects. Br. J. Clin. Pharmacol. 16: 104-105. Hussein Z, Patterson KJ, Lamm JE, Cavanaugh JH, and Granneman GR (1993) Effect of infusion duration on valproate pharmacokinetics. Biopharm. Drug Dispos. 14: 389-399. Gugler R and Meuller G (1978) Plasma protein binding of valproic acid in health…
643	Valsartan	137862-53-4	0.22	0.49	0.04	7.5	9.5	Flesch G, Muller P, and Lloyd P (1997) Absolute bioavailability and pharmacokinetics of valsartan, an angiotensin receptor antagonist, in man. Eur. J. Clin. Pharmacol. 52: 115-120. Colussi DM, Parisot C, Rossolino ML, Brunner LA, and Lefevre GY (1997) Protein binding in plasma of valsartan, a new angiotensin II receptor antagonist. J. Clin. Pharmacol. 37: 214-221.
644	Valspodar	121584-18-7	1.8	2.6	0.022	12	10	Lush RM, Meadows B, Fojo AT, Kalafsky G, Smith HT, Bates S, and Figg WD (1997) Initial pharmacokinetics and bioavailability of PSC 833, a P-glycoprotein antagonist. J. Clin. Pharmacol. 37: 123-128. Simon N, Dailly E, Combes O, Malaurie E, Lemaire M, Tillement JP, and Urien S (1998) Role of lipoproteins in the plasma binding of SDZ PSC 833, a novel multidrug resistance-reversing cyclosporin. Br. J…
645	Vancomycin	1404-90-6	0.54	1.3	0.7	6.9	6.5	Rodvold KA, Blum RA, Fischer JH, Zokufa HZ, Rotschafer JC, Crossley KB, and Riff LJ (1988) Vancomycin pharmacokinetics in patients with various degrees of renal function. Antimic. Agents Chemother. 32: 848-852. Matzke GR, McGory RW, Halstenson CE, and Keane WF (1984) Pharmacokinetics of vancomycin in patients with various degrees of renal function. Antimic. Agents Chemother. 25: 433-437. Cutler N…
646	Vardenafil	224785-90-4	3	13	0.05	3.8	4.5	Levitra Product Label
647	Vecuronium Bromide	50700-72-6	0.3	4.5	0.25	1.1	1.4	Arden JR, Lynam DP, Castagnoli KP, Canfell PC, Cannon JC, and Miller RD (1988) Vercuronium in alcoholic liver disease: a pharmacokinetic and pharmacodynamic analysis. Anesthesiology 68: 771-776. Cameron M, Donati F, and Varin F (1995) In vitro plasma protein binding of neuromuscular blocking agents in different subpopulations of patients. Anesth. Analg 81: 1019-1025. Bencini AF, Scaf AH, Sohn YJ,…
648	Venlafaxine	93413-69-5	4.4	14	0.73	5.2	5	Patat A, Troy S, Burke J, Trocherie S, Danjou P, LeCoz F, Allain H, and Gandon JM (1998) Absolute bioavailability and electroencephalographic effects of conventional and extended-release formulations of venlafaxine in healthy subjects. J. Clin. Pharmacol. 38: 256-267. Effexor Product Label.
649	Verapamil	52-53-9	3.7	18	0.093	3.4	2.8	Abernethy DR, Wainer IW, Longstreth JA, and Andrawis NS (1993) Stereoselective verapamil disposition and dynamics in aging during racemic verapamil administration. J. Pharmacol. Exp. Ther. 266: 904-911. Zachariah PK, Moyer TP, Theobald HM, Frantz RP, Kurtz SB, McCarthy JT, and Smith RL (1991) The pharmacokinetics of racemic verapamil in patients with impaired renal function. J. Clin. Pharmacol. 3…	Values for indivudual enantiomers were averaged.
650	Verlukast	120443-16-5	0.11	0.68	0.0004	2.7	2.3	Depre M, Margolskee DJ, Hseih JYK, Van Hecken A, Buntinx A, De Lepeleire I, Rogers JD, and De Schepper PJ (1992) Plasma drug profiles and tolerability of MK-571 (L-660,711), a leukotriene D4 receptor antagonist, in man. Eur. J. Clin. Pharmacol. 43: 427-430. Cheng H, Schwartz JI, Lin C, Amin RD, Seibold JR, Lasseter KC, Ebel DL, Tocco DJ, and Rogers JD (1994) The bioavailability and nonlinear phar…	Parameters were determined using C vs t data obtained by digitization of the plots in the reference by Depre, et al.
651	Viloxazine	46817-91-8	0.73	2.1	NF	5.8	4.1	Pisani F, Fazio A, Spina E, Artesi C, Pisani B, Russo M, Trio R, and Perucca E (1986) Pharmacokinetics of the antidepressant drug viloxazine in normal subjects and in epileptic patients receiving chronic anticonvulsant treatment. Psychopharmacol. 90: 295-298.	VDss calculated from data obtained by digitization of the C vs t plot in the report.
652	Vinblastine	865-21-4	28	3.1	0.14	150	67	Lu K, Yap HY, and Loo TL (1983) Clinical pharmacokinetics of vinblastine by continuous intravenous infusion. Canc. Res. 43: 1405-1408. Lee KJ, Mower R, Hollenbeck T, Castelo J, Johnson N, Gordon P, Sinko PJ, Holme K, and Lee YH (2003) Modulation of nonspecific binding in ultrafiltration protein binding studies. Pharm.Res. 20: 1015-1021.	Highly variable; used the median value.
653	Vincristine	57-22-7	2.4	2	0.4	20	23	Sethi VS, Jackson DV, White DR, Richards F, Stuart JJ, Muss HB, Cooper MR, and Spurr CL (1981) Pharmacokinetics of vincristine sulfate in adult cancer patients. Cancer Res. 41: 3551-3555. Abdel-Rahman M, Wosch F, Harder S, and Woodcock BG (1992) Interaction between verapamil and vincristine binding to plasma proteins. Int. J. Clin. Pharmacol. Ther. Toxicol. 30:536
654	Vindesine	53643-48-4	5	2.2	NF	38	35	Ohnuma T, Norton L, Andrejczuk A, and Holland JF (1995) Pharmacokinetics of vindesine given as an intravenous bolus and 24-hour infusion in humans. Cancer Res. 45: 464-469.	VDss calculated using micro rate constants provided in the reference.
655	Vinorelbine	71486-22-1	23	20	0.87	18	26	Sorio R, Robieux I, Galligioni E, Freschi, A, Colussi AM, Crivellari D, Saracchini S, and Monfardini S (1997) Pharmacokinetics and tolerance of vinorelbine in elderly patients with metastatic breast cancer. Eur. J. Cancer 33: 301-303. Gebbia V and Puozzo C (2005) Oral versus intravenous vinorelbine: clinical safety profile. Exp. Op. Drug Safety 4: 915-928.
656	Voriconazole	137234-62-9	2.2	8.3	0.42	4.4	5.6	Purkins L, Wood N, Greenhalgh K, Eve MD, Oliver SD, and Nichols D (2003) The pharmacokinetics and safety of intravenous voriconazole - a novel wide-spectrum antifungal agent. Br. J. Clin. Pharmacol. 56(Suppl. 1): 2-9. Roffey SJ, Cole S, Comby P, Gibson D, Jezequel SG, Nedderman ANR, Smith DA, Walker DK, and Wood N (2003) The disposition of voriconazole in mouse, rat, rabbit, guinea pig, dog, and …
657	Vorinostat	149647-78-9	0.5	28	0.29	0.3	0.76	Kelly WK, Richon VM, O'Connor O, Curley T, MacGregor-Curtelli B, Tong W, Klang M, Schwartz L, Richardson S, Rosa E, Drobnjak M, Cordon-Cordo C, Chiao JH, Rifkind R, Marks PA, Scher H (2003) Phase I clinical trial of histone deacetylase inhibitor: suberoylanilide hydroxamic acid administered intravenously. Clin. Cancer Res. 9: 3578-3588. Zolinza Product Label.	VDss calculated from digitized C vs t plot.
658	Warfarin	81-81-2	0.13	0.055	0.015	39	29	Bjornsson TD, Meffin PJ, Swezey S, and Blaschke TF (1979) Clofibrate displaces warfarin from plasma proteins in man: an example of a pure displacement interaction. J. Pharmacol. Exp. Ther. 210: 316-321.
659	Xamoterol	81801-12-9	0.64	3	0.97	3.6	7.7	Bastain W, Boyce MJ, Stafford LE, Morton PB, Clarke DA, and Marlow HF (1988) Pharmacokinetics of xamoterol after intravenous and oral administration to volunteers. Eur. J. Clin. Pharmacol. 34: 469-473.
660	Zalcitabine	7481-89-2	0.54	5.6	NF	1.6	1.2	Klecker RW, Collins JM, Yarchoan RC, Thomas R, McAtee N, Broder S, and Myers CE (1988) Pharmacokinetics of 2',3'-dideoxycytidine in patients with AIDS and related disorders. J. Clin. Pharmacol. 28: 837-842.
661	Zaleplon	151319-34-5	1.3	16	0.4	1.4	1.1	Rosen AS, Fournie P, Darwish M, Danjou P, and Troy SM (1999) Zaleplon pharmacokinetics and absolute bioavailability. Biopharm. Drug Dispos. 20: 171-175. Sonata Product Label.
662	Zanamivir	139110-80-8	0.23	1.6	0.86	2.4	1.7	Cass LMR, Efthymiopoulos C, and Bye A (1999) Pharmacokinetics of zanamivir after intravenous, oral, inhaled or intranasal administration to healthy volunteers. Clin. Pharmacokinet. 36(Suppl. 1): 1-11. Daniel MJ, Barnett JM, and Pearson BA (1999) The low potential for drug interactions with zanamivir. Clin. Pharmacokinet. 36(Suppl. 1): 41-50.
663	Zidovudine	30516-87-1	1.8	25	0.8	1.2	1.3	Aweeka FT, Mak M, Al-Uzri A, Peter K, Dett C, Franco J, Affrime M, Guerciolini R, Cutler DL, et al.(1995) Oral and intravenous zidovudine pharmacokinetics: The effect of granulocyte-macrophage colony stimulating factor. J. Clin. Pharmacol. 35: 856-864. Blum MR, Liao SHT, Good SS, and deMiranda P (1988) Pharmacokinetics and bioavailability of zidovudine in human. Am. J. Med. 85(Suppl 2A): 189-194.…
664	Ziprasidone	146939-27-7	1	5.1	0.0012	3.3	3.1	Miceli JJ, Wilner KD, Swan SK, and Tensfeldt TG (2005) Pharmacokinetics, safety, and tolerability of intramuscular Ziprasidone in healthy volunteers. J.Clin. Pharmacol. 45: 620-630. Aweeka F, Jayesekara D, Horton M, Swan S, Lambrecht L, Wilner KD, Sherwood J, Anziano RJ, Smolarek TA, and Turncliff RZ (2000) The pharmacokinetics of ziprasidone in subjects with normal and impaired renal function. B…
665	Zoledronic Acid	118072-93-8	0.6	2.2	0.78	4.5	11	Skerjanec A, Berenson J, Hsu C, Major P, Miller WH, Ravera C, Schran H, Seaman J, and Waldmeier F (2003) The pharmacokinetics and pharmacodynamics of zoledronic acid in cancer patients with varying degrees of renal function. J. Clin. Pharmacol. 43: 154-162. Reclast Product Label.	Pharmacokinetic parameters were calculated from C vs t data obtained by digitization of the plot provided in the reference.
666	Zolmitriptan	139264-17-8	1.8	6.7	0.75	4.6	3.6	Seaber EJ, Peck RW, Smith DA, Allanson J, Hefting NR, Van Lier JJm Sollie FAE, Wemer J, and Jonkman JHG (1998) The absolute bioavailability and effect of food on the pharmacokinetics of zolmitriptan in healthy volunteers. Br. J. Clin. Pharmacol. 46: 433-439. Dixon R and Warrander A (1997) The clinical pharmacokinetics of zolmitriptan. Cephalalgia 17(Suppl 18): 15-20.
667	Zolpidem	82626-48-0	0.54	4.3	0.08	2.1	1.7	Thenot JP, Hermann P, Durand A, Burke JT, Allen J, Garrigou D, Vajta S, Albin H, Thebault JJ, Olive G, and Warrington SJ (1988) Pharmacokinetics and metabolism of zolpidem in various animal species and humans. In Imidazopyridines in Sleep Disorders (ed Sauvanet JP, Langer SZ, and Morselli PL). Raven Press, New York, pp 139-153.
668	Zonampanel	210245-80-0	0.19	5.3	NF	0.6	0.78	Minematsu T, Sohida KY, Hashimoto T, Imai H, Usui T, and Kamimura H (2005) Identification of metabolites of [14C]zonampanel, an alpha-amino-3-hydroxy-5-methylisoxazole-4-propionate receptor antagonist, following intravenous infusion in healthy volunteers. Xenobiotica 35: 359-371.
669	Zopiclone	43200-80-2	1.3	3.3	0.2	6.6	5.2	Gaillot J, Heusse D, Hougton GW, Marc Aurele J, Dreyfus JF (1983) Pharmacokinetics and metabolism of zopiclone. Pharmacology 27(suppl. 2): 76-91. Fernandez C, Gimenez F, Thuillier A, and Farinotti R (1999) Stereoselective binding of zopiclone to human plasma proteins. Chirality 11: 129-132.
670	Zotarolimus	221877-54-9	1.3	0.67	NF	33	35	Palaparthy R, Pradhan R, Chan J, Wang Q, Ji Q, Achari R, Chira T, Schwartz LB, O'Dea R (2005) Pharmacokinetics and safety of ABT-578, a sirolimus (rapamycin) analogue, after single intravenous bolus injection in healthy male volunteers. Clin. Drug. Invest. 25: 491-498.
